# Supplementary material for: Continuous-Flow Synthesis of Arylthio-Cyclopropyl Carbonyl Compounds
Source: MDPI journal article supplement (doi:10.3390/molecules27227943), 2022-11-16
Supplement: s1 [file s1]

# Continuous-Flow Synthesis of Arylthio-Cyclopropyl Carbonyl Compounds

Davide Moi <sup>1</sup>, Maria Chiara Cabua <sup>1</sup>, Viktoria Velichko <sup>1</sup>, Andrea Cocco <sup>1</sup>, Annalisa Chiappone <sup>1</sup>, Rita Mocci <sup>1</sup>, Stefania Porcu <sup>2</sup>, Monica Piras <sup>3</sup>, Stefano Bianco <sup>4</sup>, Fabio Pesciaioli <sup>5,\*</sup> and Francesco Secci <sup>1,\*</sup>

## Table of contents

|                                                                             |     |
|-----------------------------------------------------------------------------|-----|
| 1. General remarks                                                          | S2  |
| 1.1. Catalyst milling procedure and column filling                          | S2  |
| 1.2. Catalyst loading and continuous flow parameters                        | S3  |
| 1.3. Continuous Flow system scheme                                          | S3  |
| 2. Grinded amberlyst 35 thermogravimetric analysis                          | S4  |
| 3. ATR-FTIR analysis of grinded AR-35                                       | S5  |
| 4. Brunauer–Emmett–Teller (BET) surface area analysis of AR-35              | S6  |
| 5. Scanning electron microscopy analysis of grinded AR-35                   | S8  |
| 6. AR-35 columns performance testing                                        | S10 |
| 7. <sup>1</sup> H and <sup>13</sup> C NMR characterization of compounds 3-7 | S12 |
| 8. References and notes                                                     | S25 |
| 9. Full BET original analysis reports                                       |     |

## 1. General remarks

Unless stated otherwise, respectively the synthesis of compounds **3a-j** were performed at room temperature using a continuous flow system constituted by an AR-35 packed column, two syringe pumps KD scientific Legato Syringe (or two HPLC pumps, Hitachi Elite la Chrom D2130) and a collecting flask. Synthesis of compounds **4-8** were performed at the indicated temperatures in a round bottom flask equipped with a stirring bar. Commercially available reagents were used as received unless otherwise noted. The resins used in this work were purchased from Sigma Aldrich (Amberlyst 15 and Amberlyst 35) and used after ball mill grinding. All the organic solvents used in these reactions have to be considered HPLC grade.  $^1\text{H}$  NMR spectra were recorded on 400 and 500 MHz Varian spectrometers at 300.15 K using  $\text{CDCl}_3$  (ref. 7.27 ppm), as a solvent.  $^{13}\text{C}$  NMR were recorded at 101 MHz and 126 MHz (ref.  $\text{CDCl}_3$  77.00 ppm) at 300.15 K using  $\text{CDCl}_3$ , as solvent. Chemical shifts ( $\delta$ ) are given in ppm. Coupling constant values ( $J$ ) are reported in Hz. Infrared spectra were recorded on a FT-IR Bruker Equinox-55 spectrophotometer and are reported in wavenumbers ( $\text{cm}^{-1}$ ). Low Mass Spectra Analysis were recorded on an Agilent-HP GC-MS (E.I. 70eV). High Resolution Mass Spectra (HRMS) were obtained using a Bruker High Resolution Mass Spectrometer in fast atom bombardment ( $\text{FAB}^+$ ) ionization mode. Melting points were determined with a Büchi M-560. Analytical thin layer chromatography was performed using 0.25 mm Aldrich silica gel 60-F plates. Flash chromatography was performed using Merk 70-200 mesh silica gel. Yields refer to chromatography and spectroscopically pure materials or using a Biotage Selekt Flash Chromatography instrument.

### 1.1. Catalyst milling procedure and column filling

Amberlyst 15 and amberlyst 35 (1.0g) was loaded into a zirconia SmartSnap™ grinding jar (15 mL) equipped with 1 ball ( $\varnothing = 8$  mm). The jar was sealed and shaken for 15 minutes at a frequency of 20 Hz using a FormTech FTS-1000 Shaker Mill® apparatus.

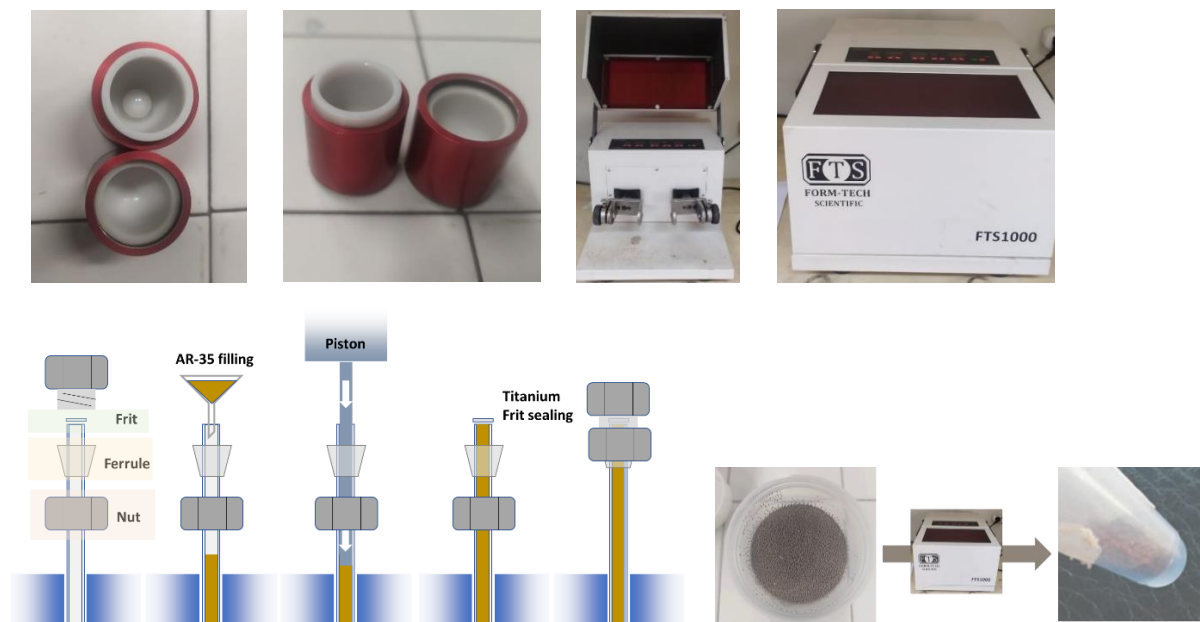

**Figure S1.** Process of grinding, filling and closure of the columns used for the synthesis of arylthio cyclopropyl carbaldehydes

After grinding, the powder was dried under vacuum at  $50^\circ\text{C}$  and filled portionwise (500 mg) in the column by using a funnel. The resin introduced into the column is pressed through an oil piston reaching an exerted pressure of  $500\text{ kg/cm}^2$ . The system is then sealed with a porous titanium frit and subsequently closed by tightening the column. To keep the columns away from moisture before they are used for the first time, they are closed with HPLC column caps and stored in a desiccator.

### 1.2. Catalyst loading and continuous flow parameters

- 5 cm columns (internal diam. 0.8 cm). Total amount of loaded AR-35 4.0 g
- 10 cm columns (internal diam. 0.8 cm). Total amount of loaded AR-35 8.0g
- 15 cm columns (internal diam. 0.8 cm). Total amount of loaded AR-35, ca. 12g

In this work the void volume  $V_0$  is defined as the volume of the liquid phase within the column and can be converted from the residence time ( $\tau_{\text{res}}$ ) and the mobile phase flow rate ( $Fr$ ).<sup>1</sup>

$$V_0 [\text{cm}^3] = \tau_{\text{res}} [\text{min}] \times \text{Flow rate} [\text{mL/min}]$$

$$V_{0\text{15 cm column}} [\text{cm}^3] = 5.6 \text{ min } Fr [0.5 \text{ mL/min}] = 2.8$$

### 1.3. Continuous Flow system scheme

For 15 cm columns packed with 12 g of AR-35.

The description of single parts (HPLC pumps, Raman probe etc. are reported in the general methods).

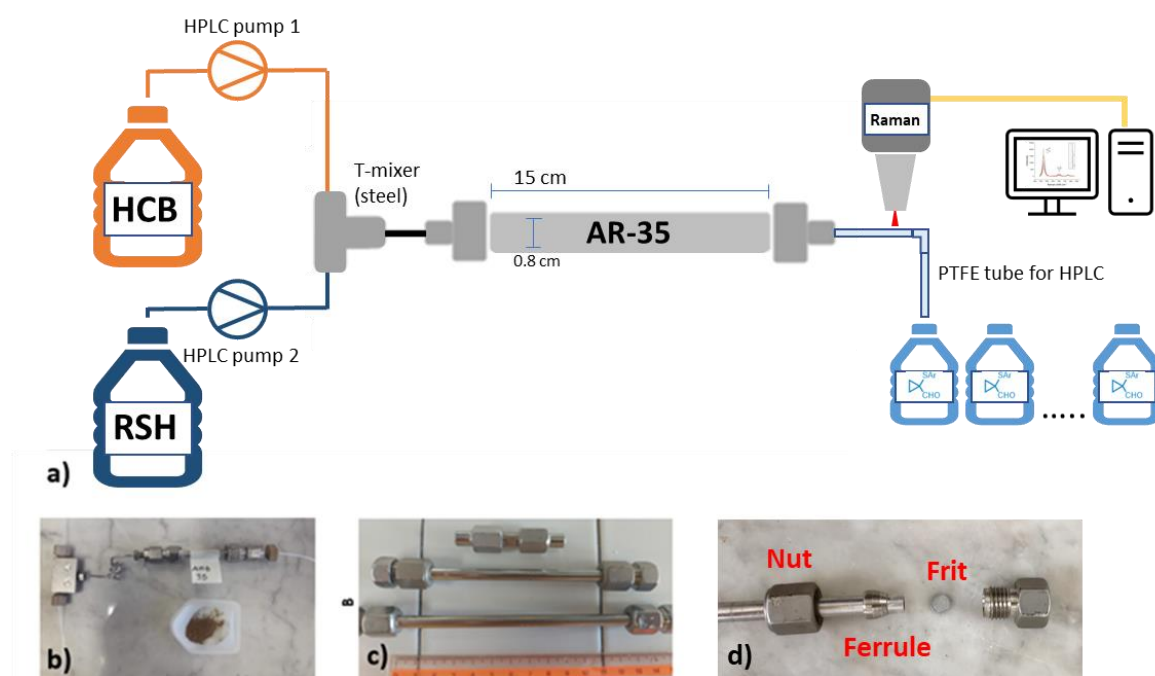

**Figure S2.** a) Representative diagram of the continuous flow system; b) 5 cm stainless steel column packed with AR-35; c) 2, 10 and 15 cm AR-35 packed columns; d) column components.

## 2. Grinded amberlyst 35 thermogravimetric analysis

TGA was performed with a NETZSCH TG 209F1 Libra instrument. The samples were dried overnight at 60°C. The test was performed under nitrogen flux imposing a heat ramp at 10°C/min up to 100, followed by 15 min of isothermal treatment (100°C) and then a second ramp up to 700 °C<sup>2</sup> (10°C/min) (figure S3)

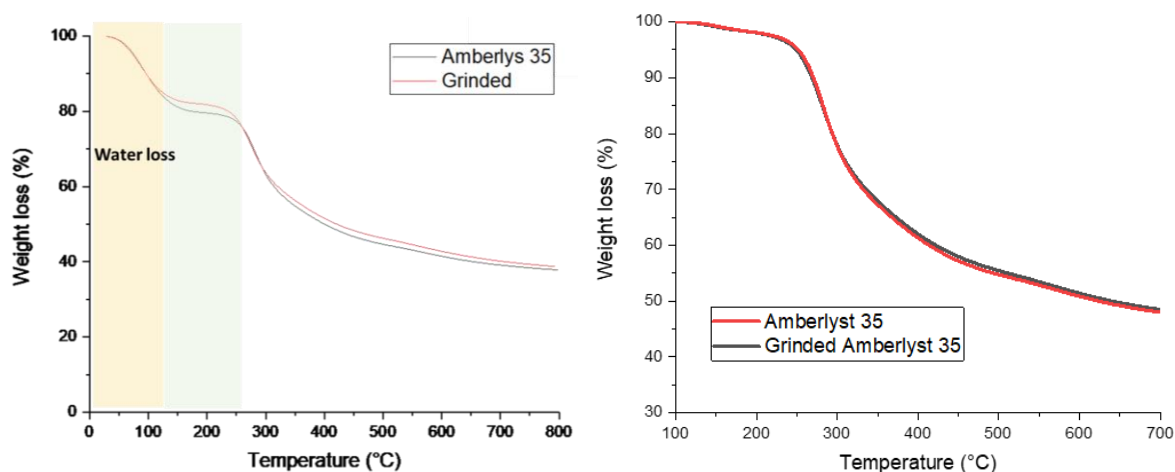

**Figure S3.** Comparison of TGA experiments between neat AR-35 and grinded AR-35 pre and post water removal by eating the sample.

From these analyses, it seems that the grinding process does not influence the thermal stability of the material. The grinded material presents a slightly higher weight loss during the first heating ramp up to 100°C that is linked to a higher water absorption before the measurement (figure S3).

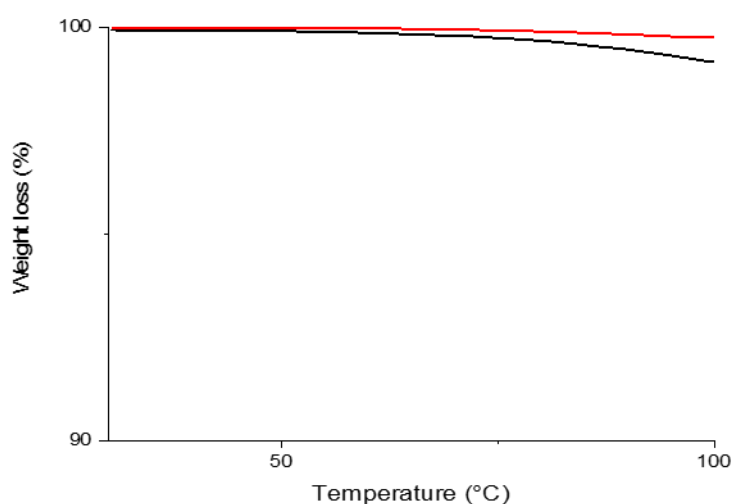

**Figure S4.** Comparison of TGA experiments between neat AR-35 and grinded AR-35

### 3. ATR-FTIR analysis of grinded AR-35

Attenuated total reflectance-infrared spectroscopy (ATR-FTIR) was performed with a Thermo Scientific Nicolet iS50 FTIR Spectrometer equipped with a diamond crystal ATR accessory. Thirty-two ATR spectra were collected with a resolution of  $4\text{ cm}^{-1}$  in the range of  $4000\text{--}500\text{ cm}^{-1}$ . The peak at  $2923\text{ cm}^{-1}$  was due to the aliphatic C single bond H stretching absorbance of methyl group in the main chain and in aromatic rings<sup>3</sup> (figure S4).

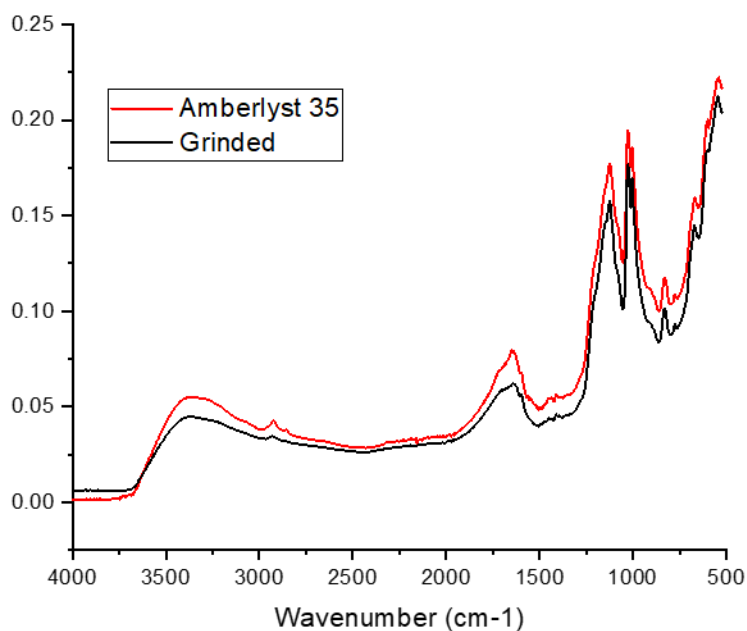

**Figure S5.** ATR-FTIR collected spectra of neat AR-35 and grinded AR-35

#### 4. Brunauer–Emmett–Teller (BET) surface area analysis of AR-35

BET measurements were performed with a ASAP 2020 Plus Micrometrics instrument. An adsorptive analysis of N<sub>2</sub> was performed at 77 K (see attached document).

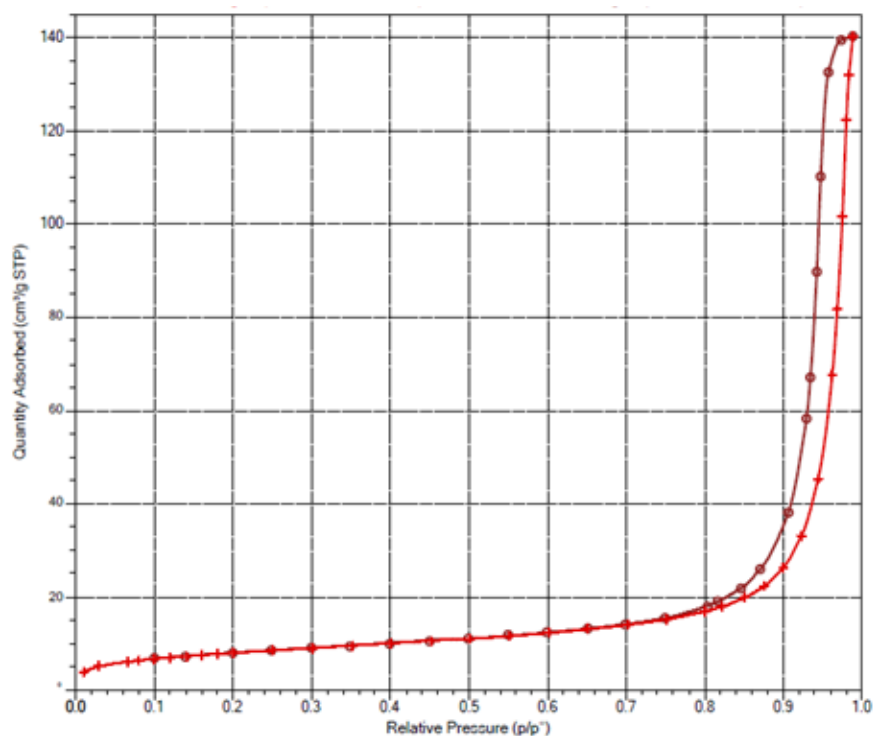

**Figure S6.** BET Isotherm Linear Plot Neat Amberlyst 35. Neat Amberlyst 35 BET surface area 28,6015 m<sup>2</sup>/g, grinded sample BET surface area 4,8426 m<sup>2</sup>/g

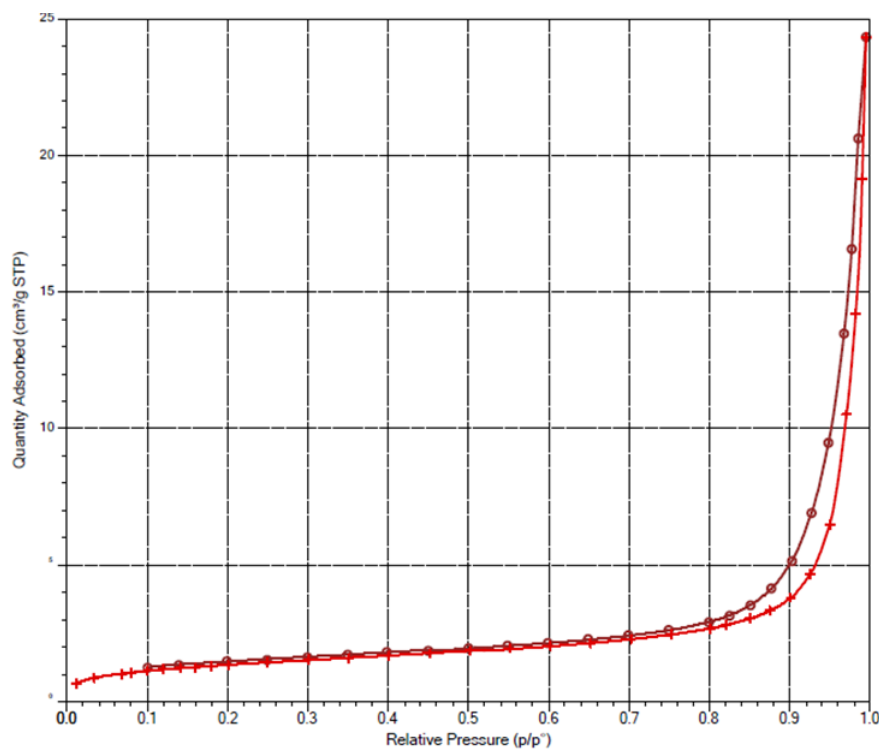

**Figure S7.** BET Isotherm Linear Plot grinded Amberlyst 35

EDX spectroscopy analysis was performed using a Bruker nano analytics probe for the characterization of AR-35, coupled to STEM.

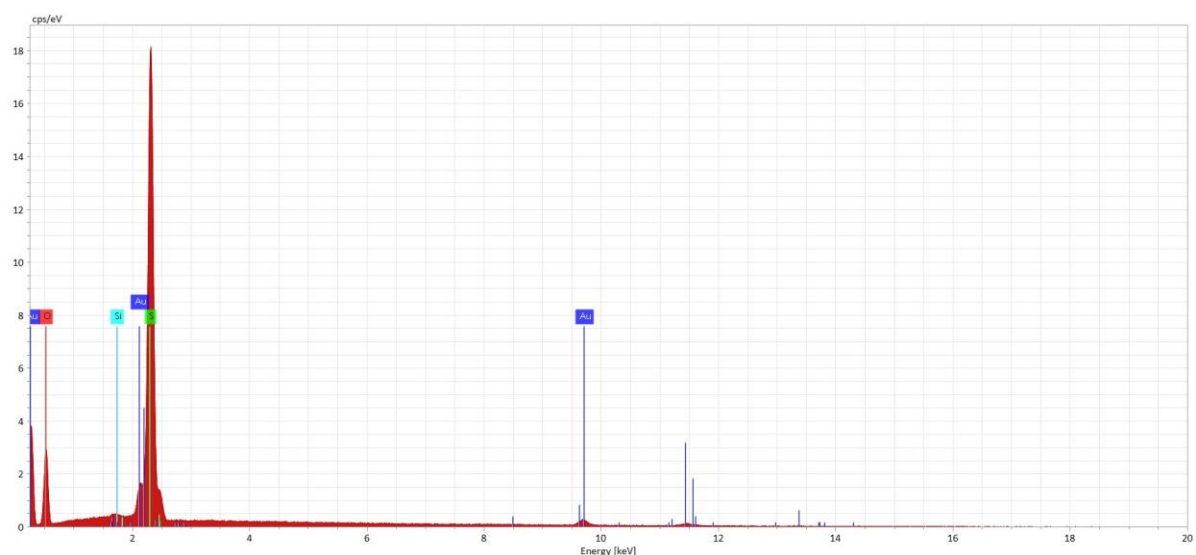

**Figure S8.** EDX (energy dispersive x-ray spectroscopy) analysis of a grinded AR-35 sample. Analysis of the surface material during the STEM analysis process and elements abundance. The higher peak is related to the amount of sulphur (as sulfonic acid) which is present in the amberlyst 35.



## 5. Scanning electron microscopy analysis of grinded AR-35

SEM was used to observe the microstructure surface of the sample. The sample was lying on a double-sided tape and thin strips of conductive copper sheet were placed in some places. Subsequently was sputtering gold to ensure good electrical conductivity. Finally the sample was observed by Zeiss Sigma 300 SEM electron microscope (FEG Oberkochen, Germany) in backscattered (AsB) mode.<sup>4</sup>

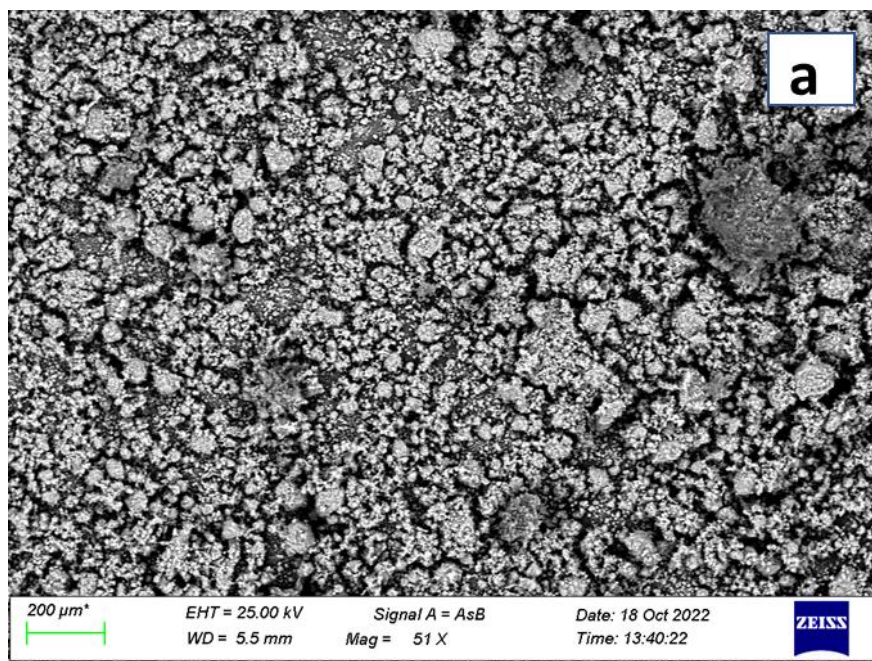

**Figure S9.** (51X) Microstructure overview of sample AR-35 after ball mill grinding. To better analyse the structures of the sample AsB backscattered method was used.

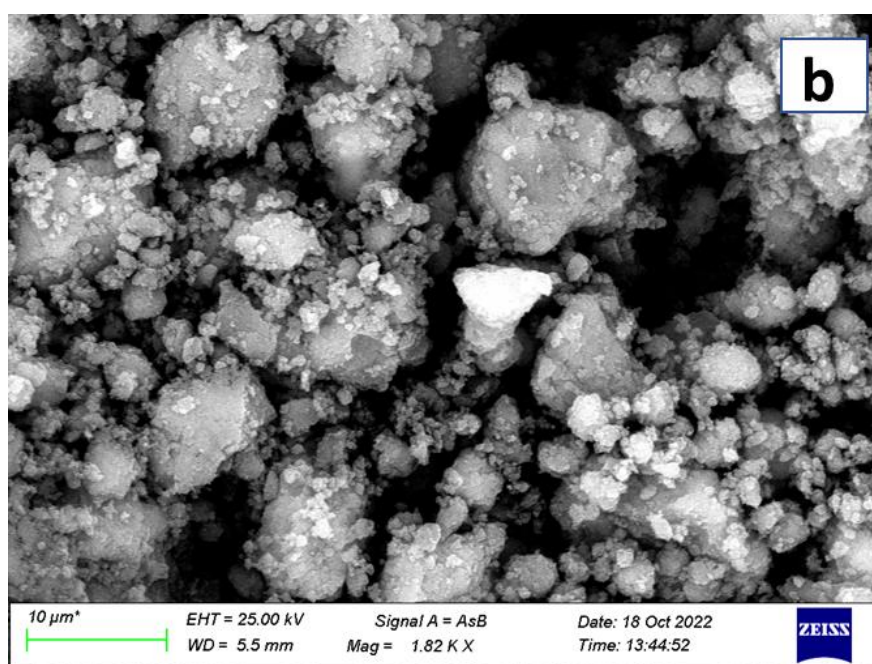

**Figure S10.** (1800X) Microstructure overview of sample AR-35. After ball mill grinding. To better analyse the structures of the sample AsB backscattered method was used.



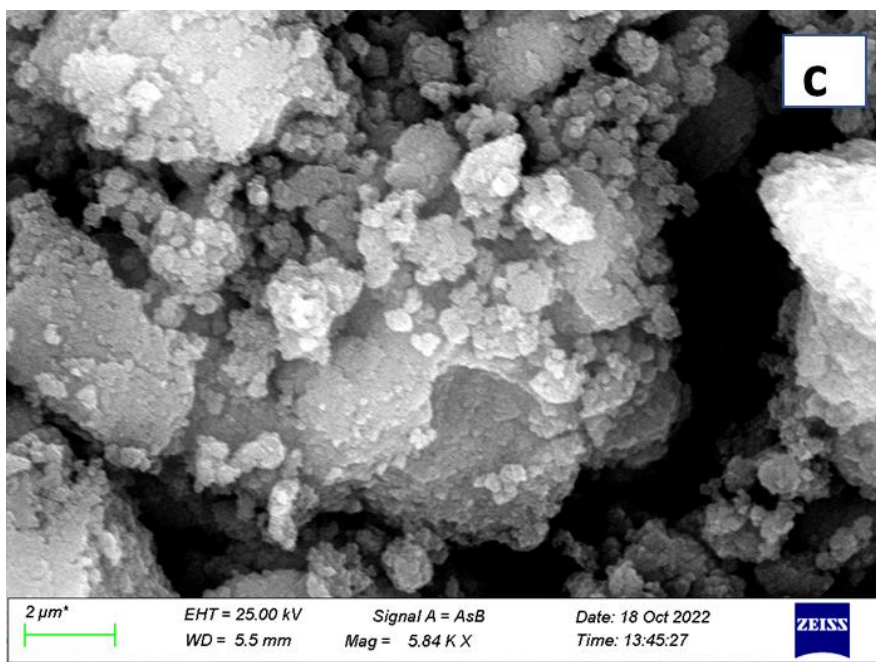

**Figure S11.** (5800X) The image shows a detail about the field displayed in figure S9.

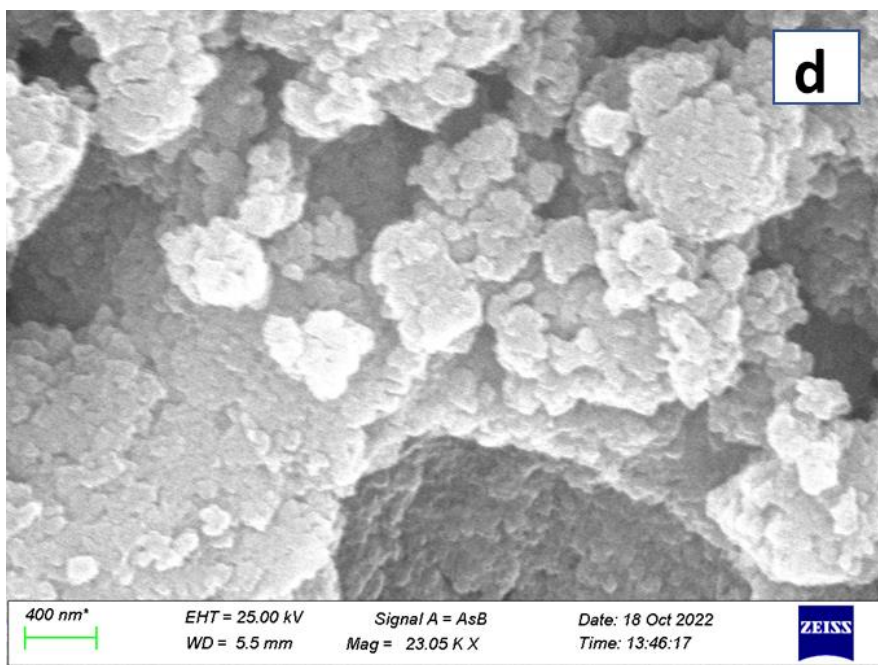

**Figure S12.** (23000) The image shows a detail about the field displayed in figure S10.

## 6. AR-35 columns performance testing

In order to evaluate the reuse and reconditioning of the columns packed with AR-35, once used for 10 hours, they were connected to an acid corrosion resistant HPLC pump which dispensed 50 ml of a 10% solution. in THF 1mL / min (900 psi) of methane sulfonic acid. Then, pure THF was flushed for 60 minutes. After this treatment, the columns were used to evaluate their catalytic performance in two other runs.

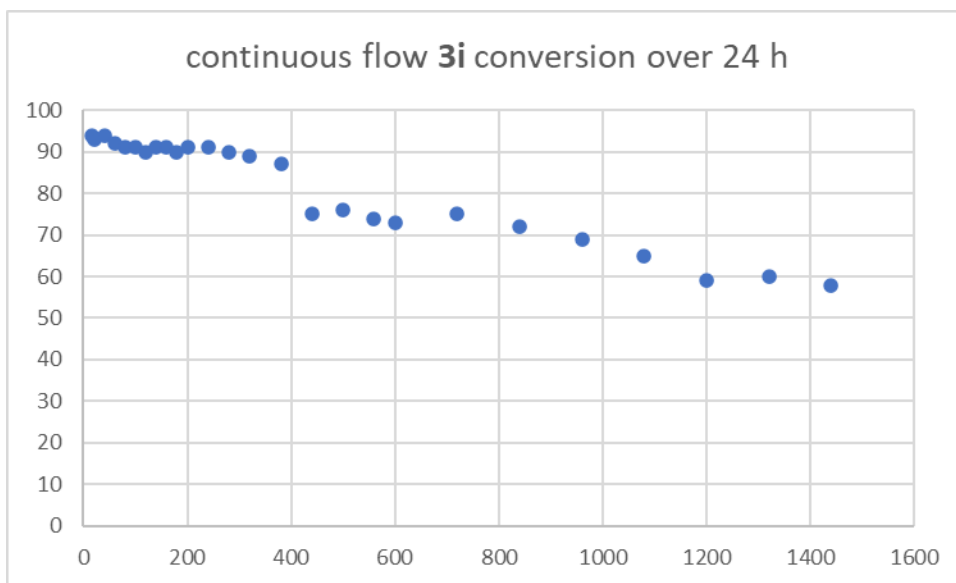

**Figure S13.** determination of the conversion of 3i under continuous flow conditions using freshly grinded AR-35.

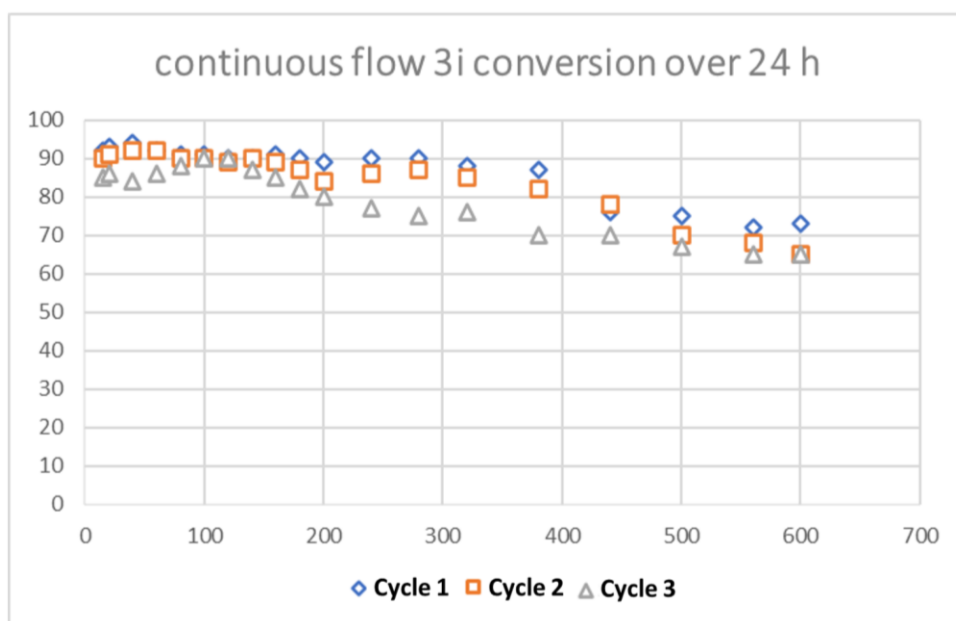

**Figure S14.** Comparison of the conversions for compound 3i under continuous flow conditions using freshly grinded AR-35 over ten hours (cycle 1, blue), reconditioned AR-35 (cycles 2 orange, and cycle 3, grey).

### TON and TOF calculation

The TON was calculated taking into consideration experiments lasting 24h in which the conversion of **1b** to **3i** (M.W. 206g / mol) ranged from > 93% to approx. 70-75%. In these experiments an average quantity of product equal to 32 g was obtained, which correspond to about 155 mmol/24h.<sup>5</sup>

$$\text{TON} = \frac{\text{mmol of } \mathbf{3i}}{(\text{acid sites by gram of catalyst}) \times (\text{gram of catalyst})} = \frac{155 \text{ mmol of } \mathbf{3i}}{63.60} = 2.43$$

$$\text{TOF} = \frac{\text{TON}}{\text{Time (min)}} = \frac{2.43}{1440} = 0.0017$$

## 7. NMR characterization of compounds 3-7

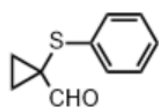

3a 1-(phenylthio)cyclopropanecarbaldehyde

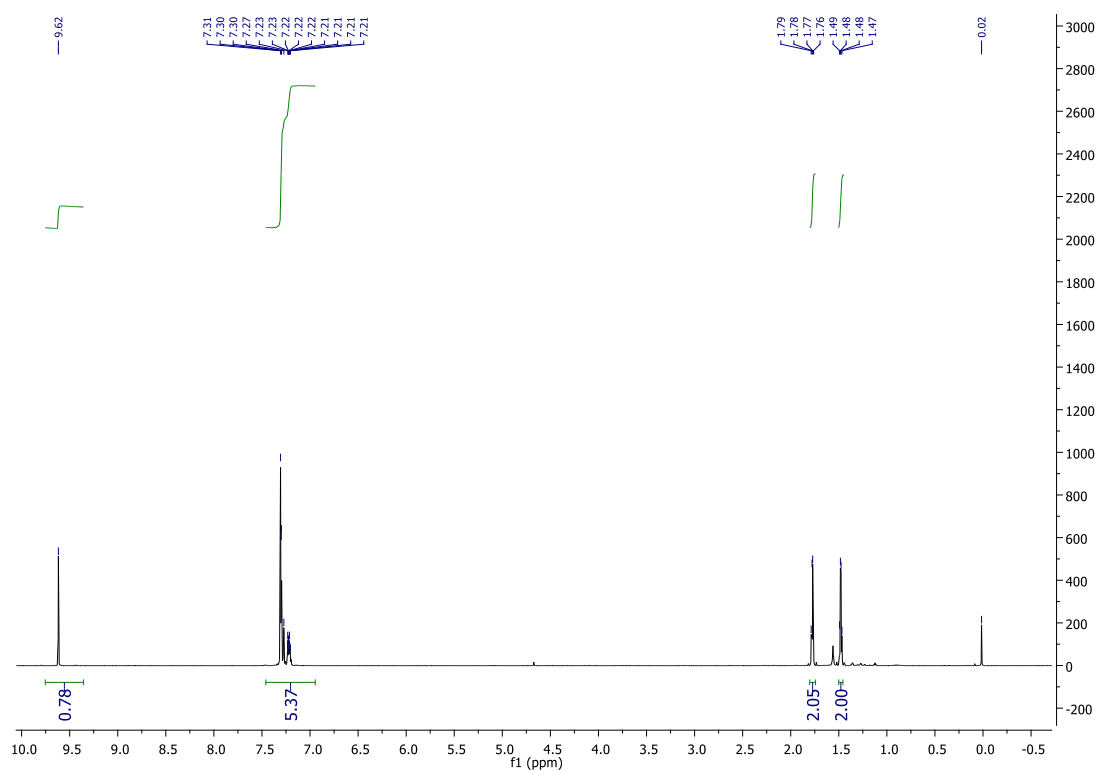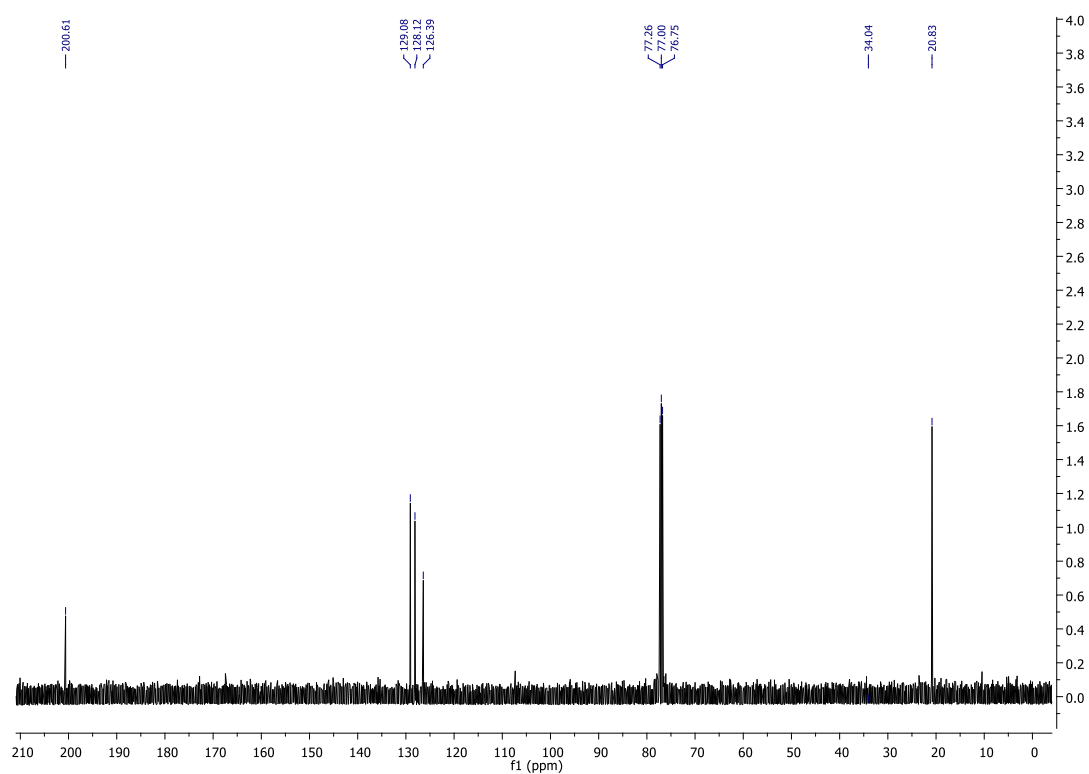

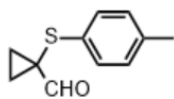

3b 1-(*p*-tolylthio)cyclopropanecarbaldehyde

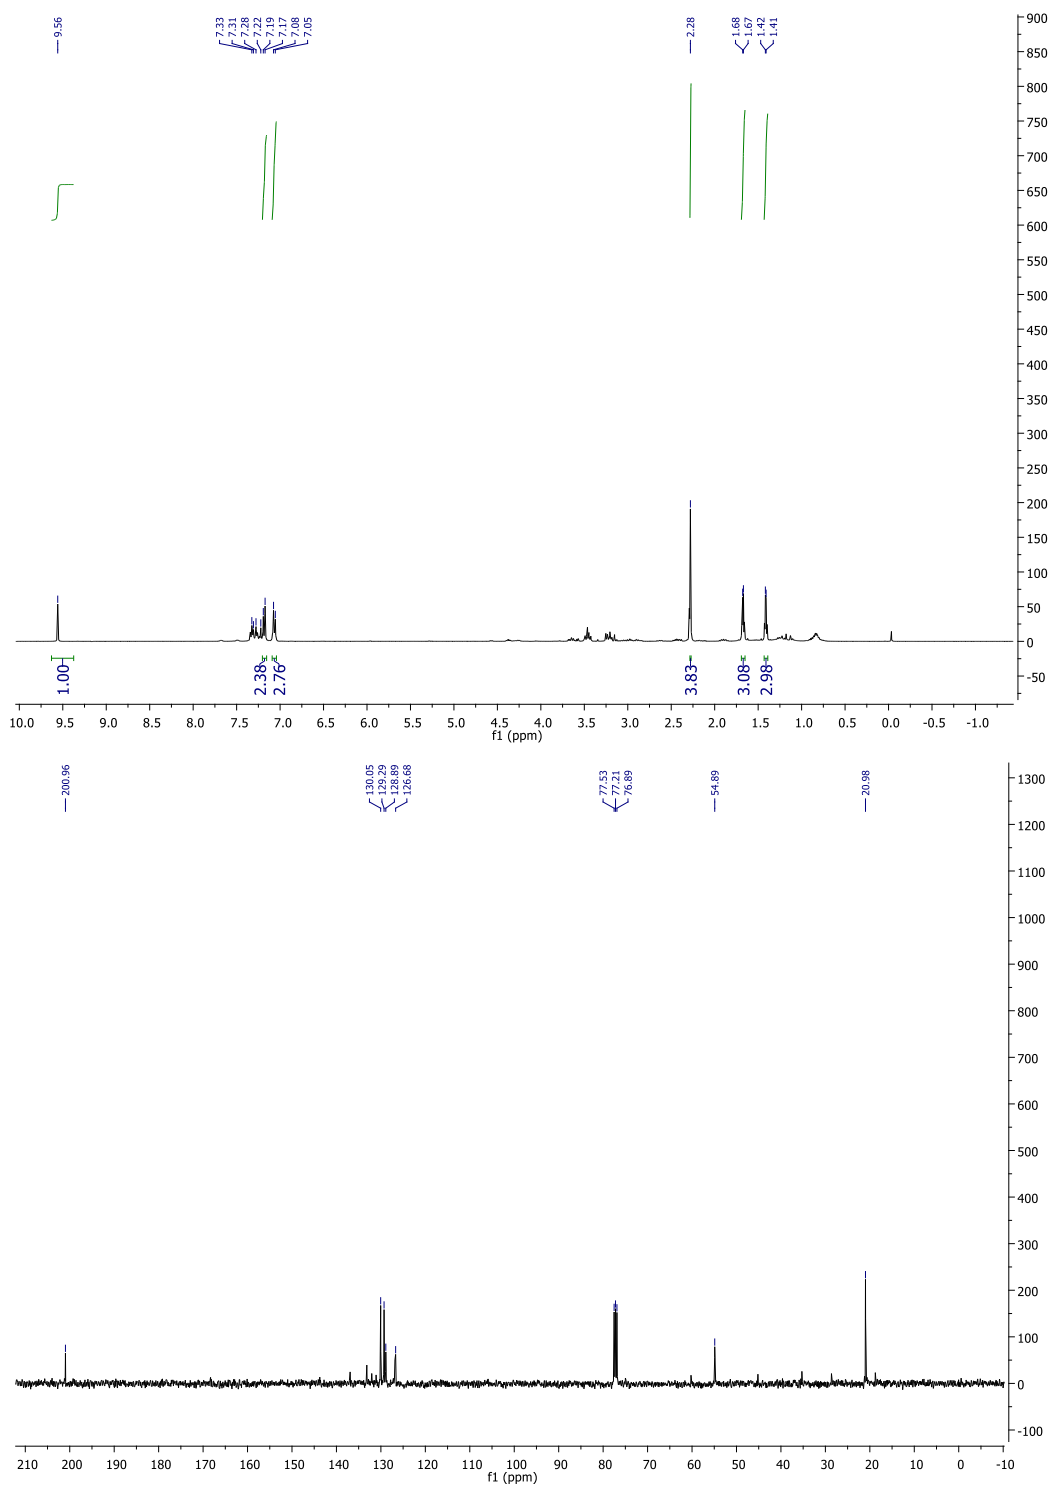

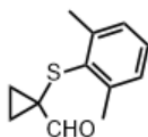

3c 1-((2,6-dimethylphenyl)thio)cyclopropanecarbaldehyde

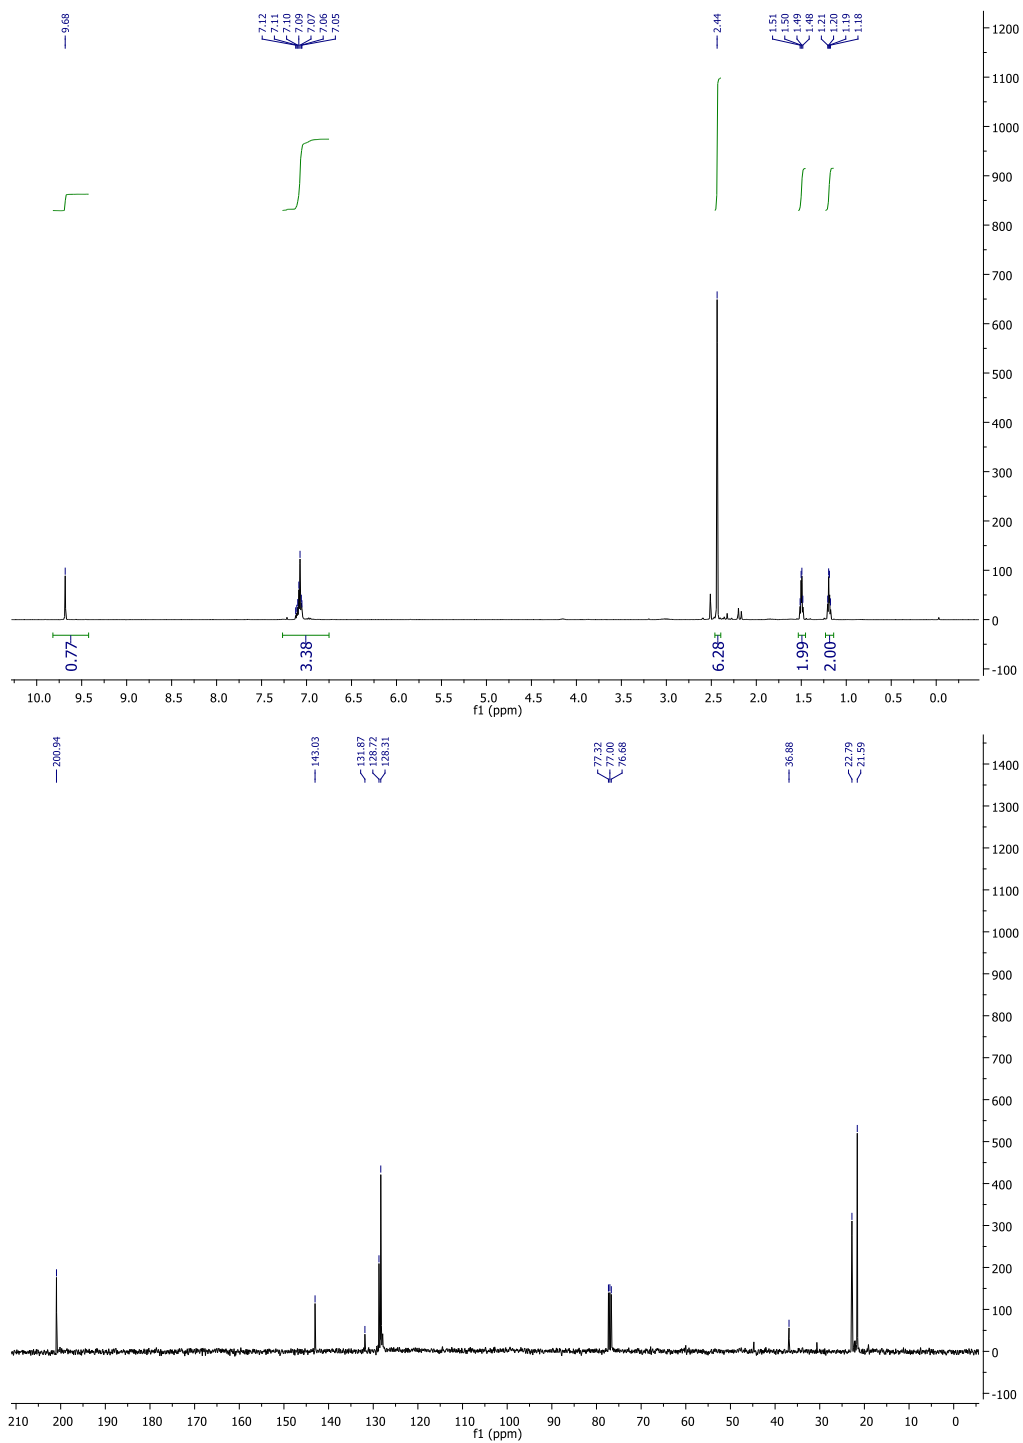

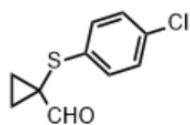

3d 1-((4-chlorophenyl)thio)cyclopropanecarbaldehyde

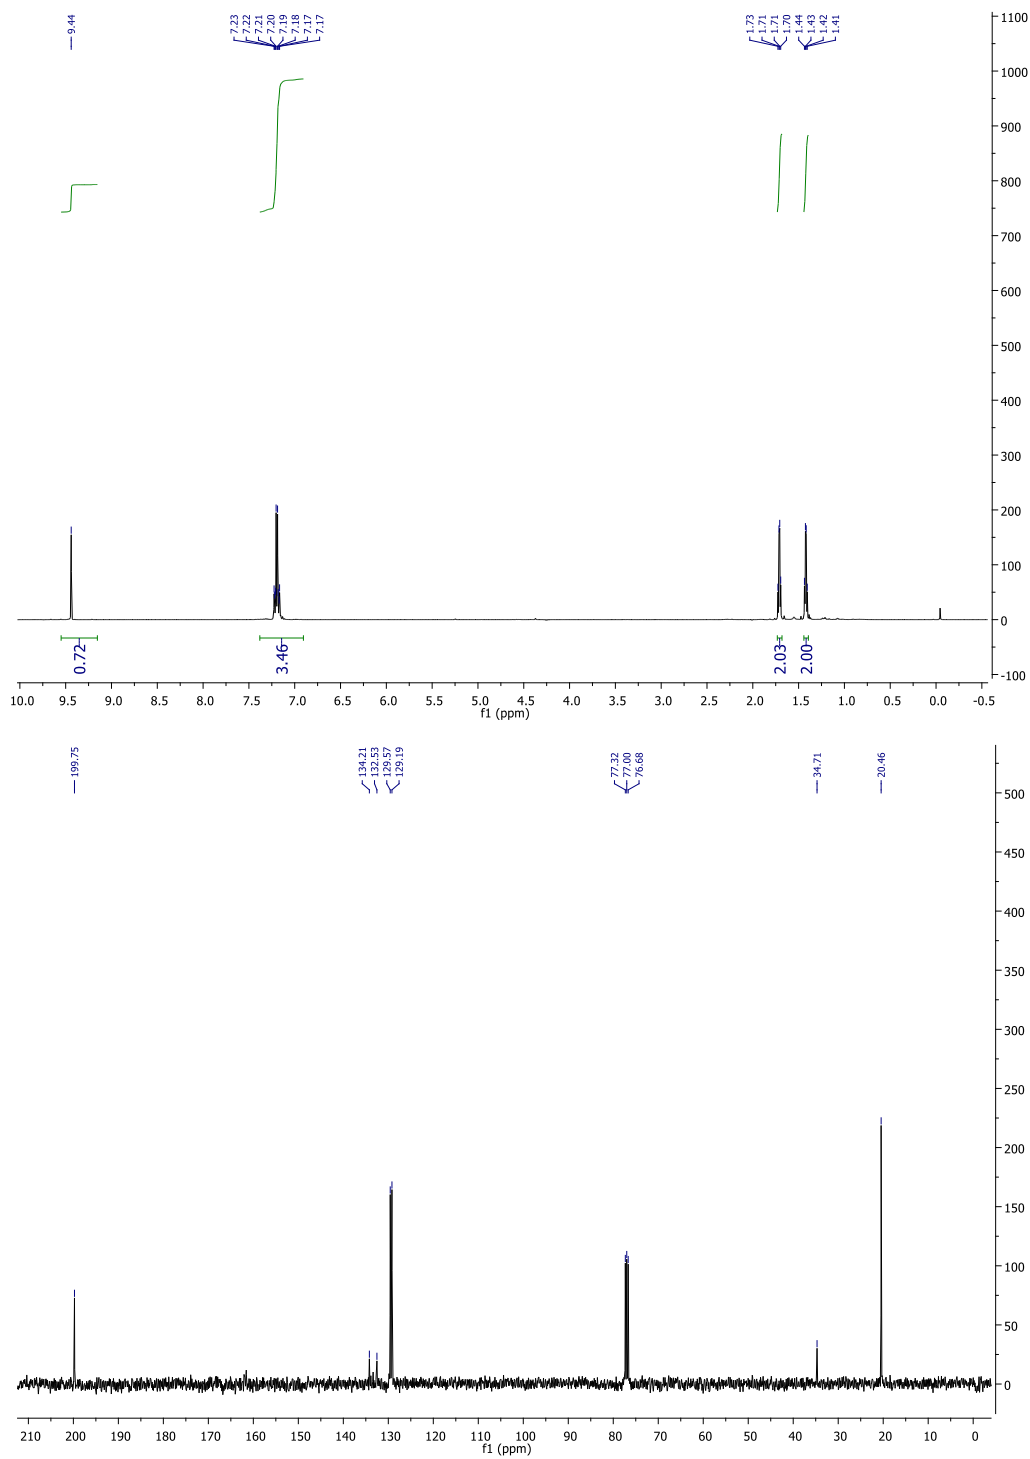



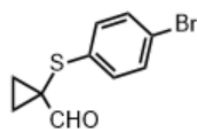

3e 1-((4-bromophenyl)thio)cyclopropanecarbaldehyde

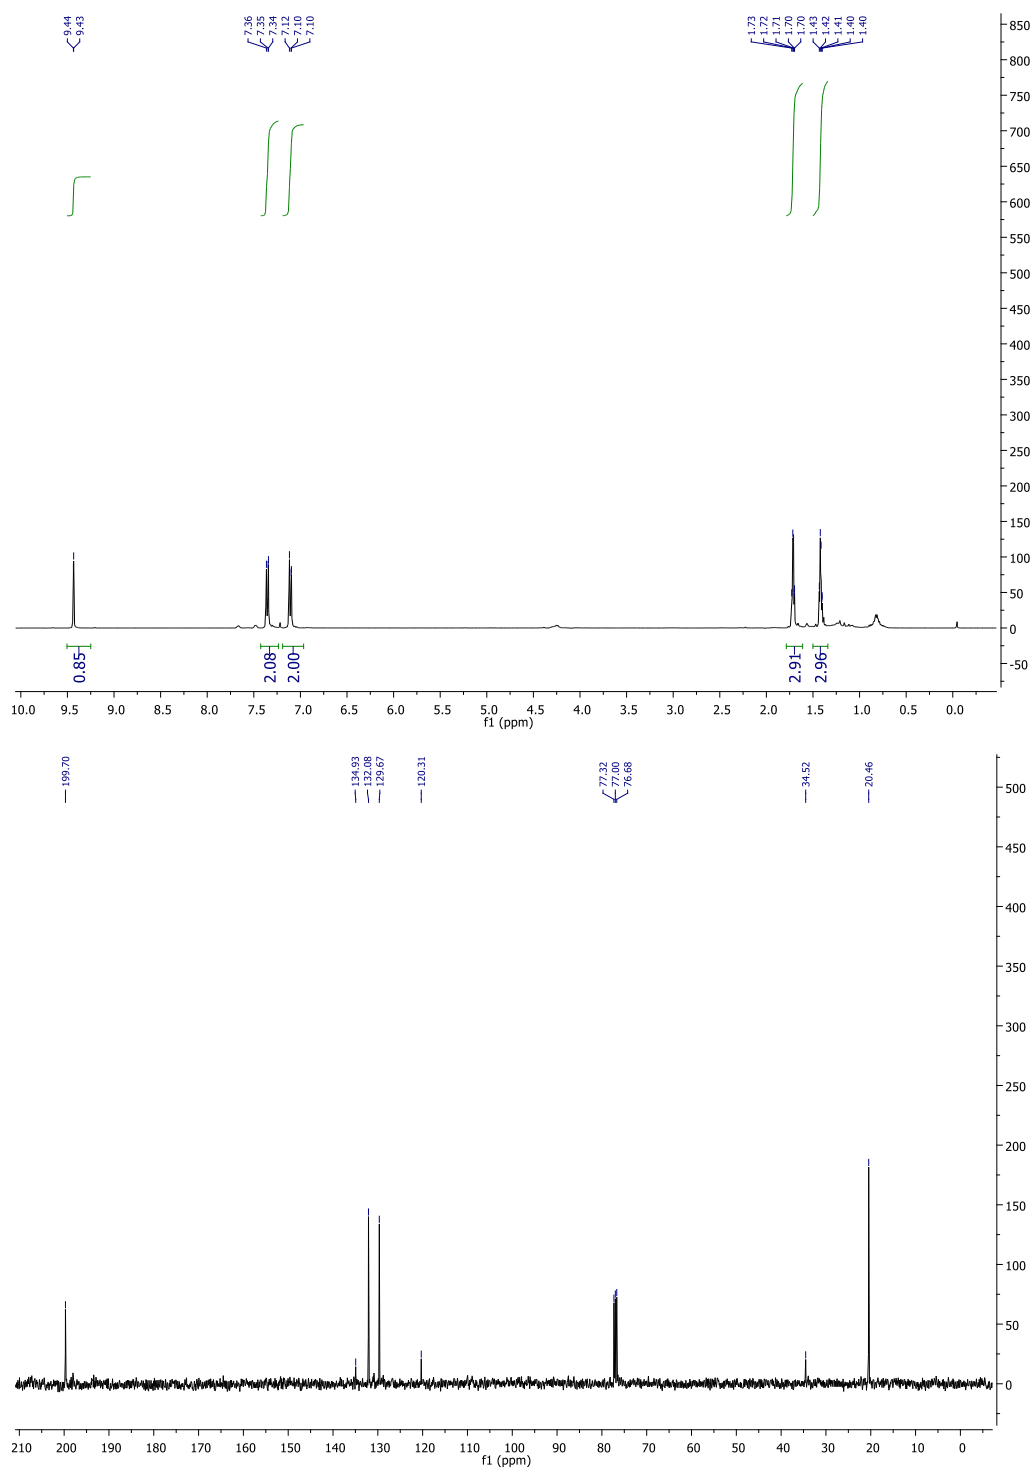

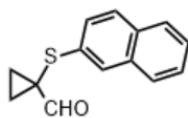

3f 1-(naphthalen-2-ylthio)cyclopropanecarbaldehyde

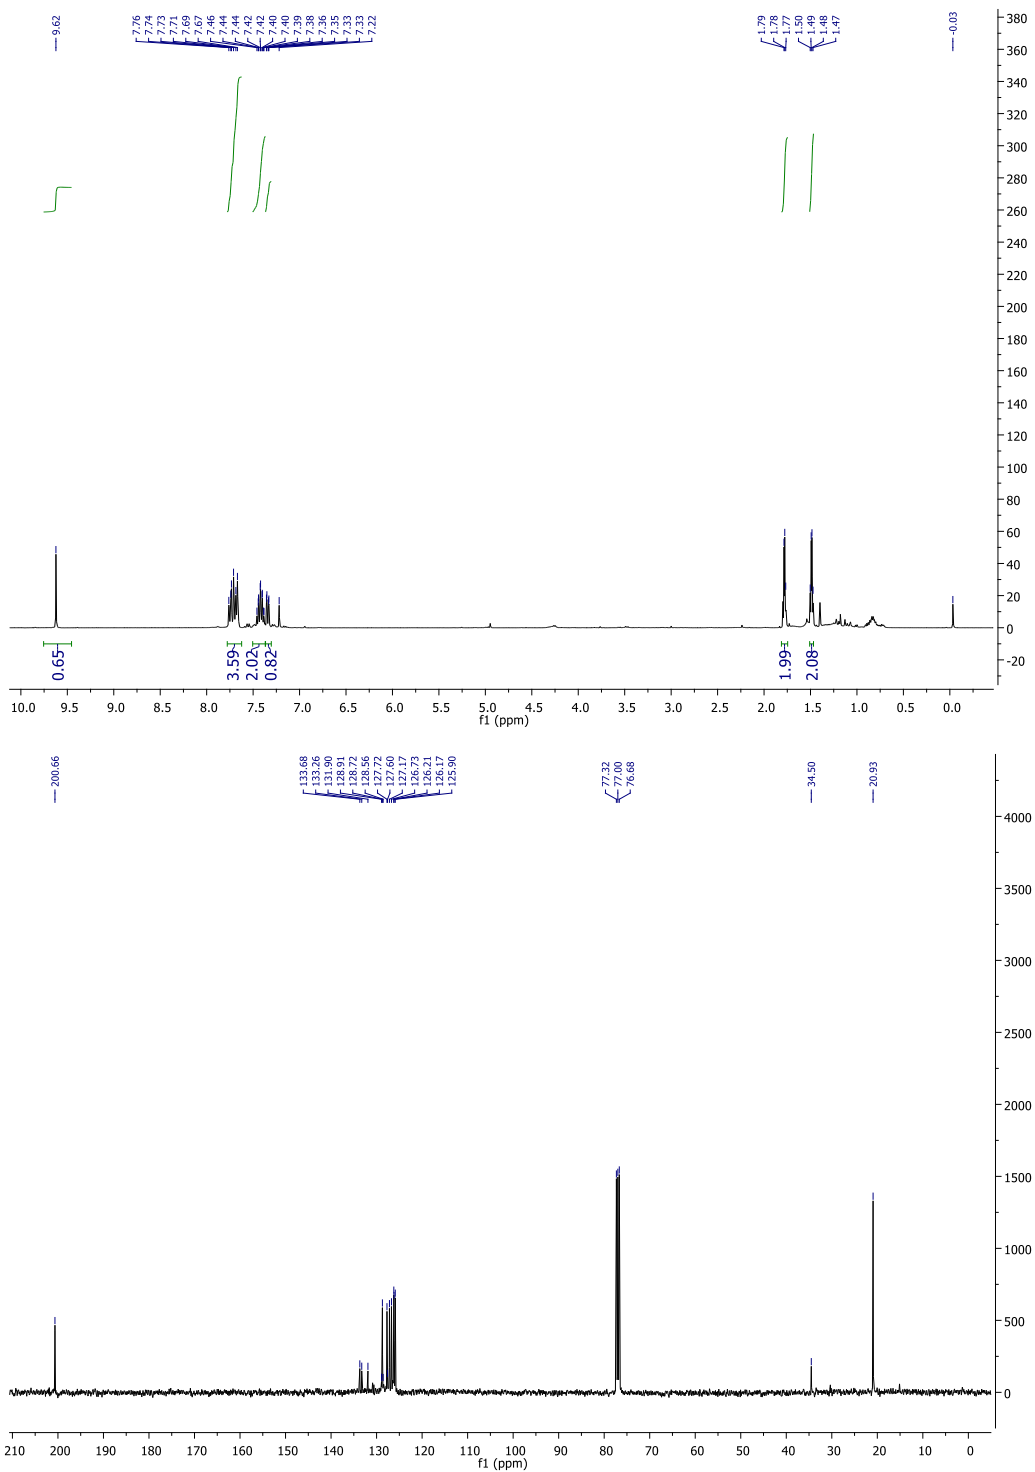

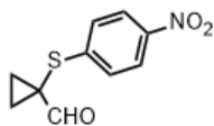

3g 1-((4-nitrophenyl)thio)cyclopropanecarbaldehyde

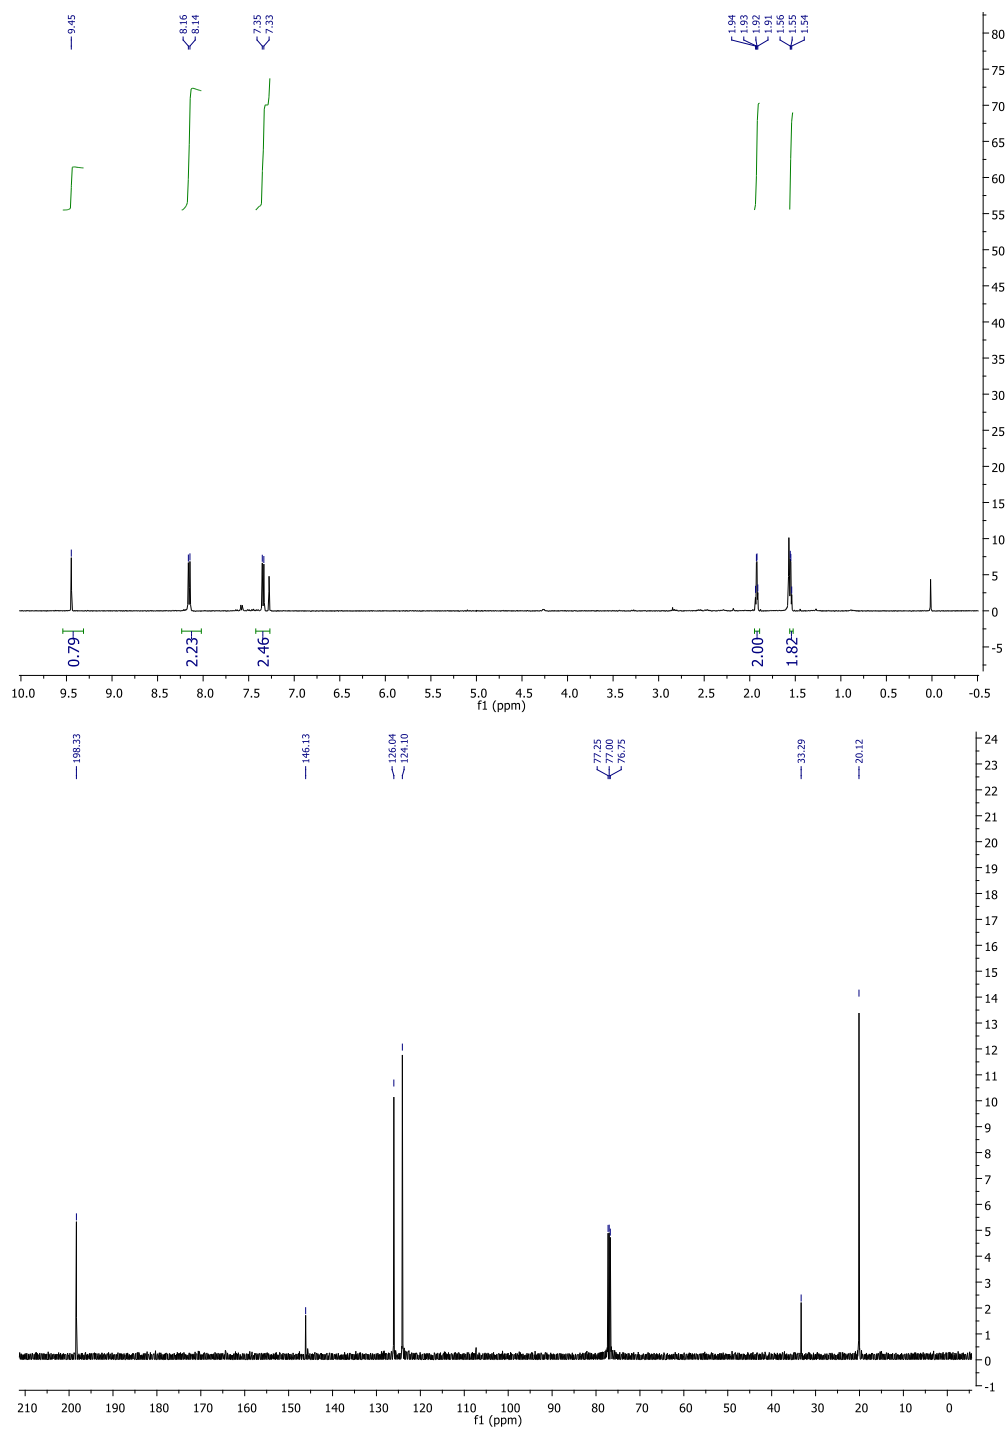

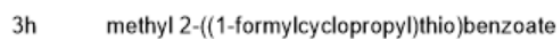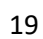

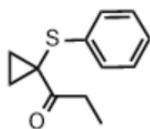

3j 1-(1-(phenylthio)cyclopropyl)propan-1-one

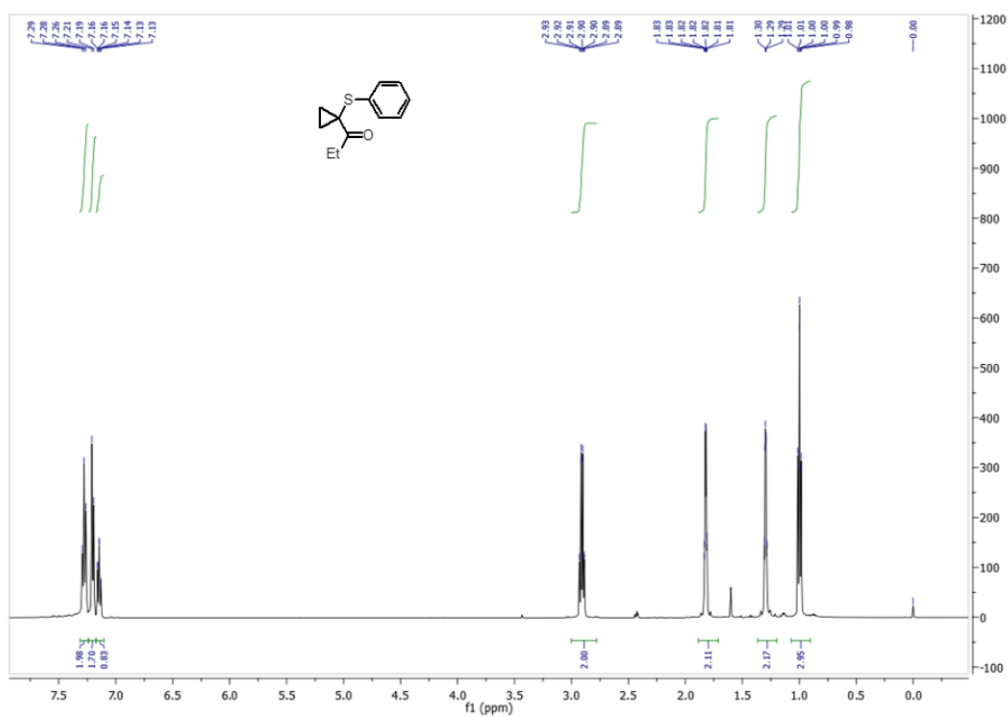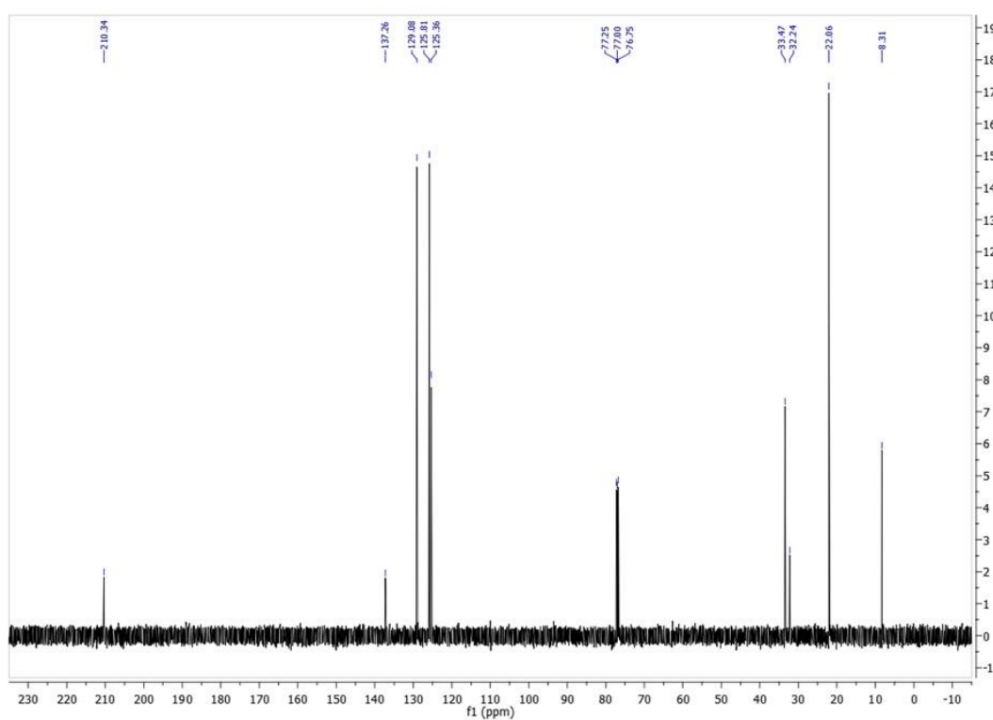

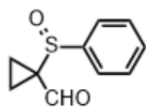

4. 1-(phenylsulfinyl)cyclopropanecarbaldehyde

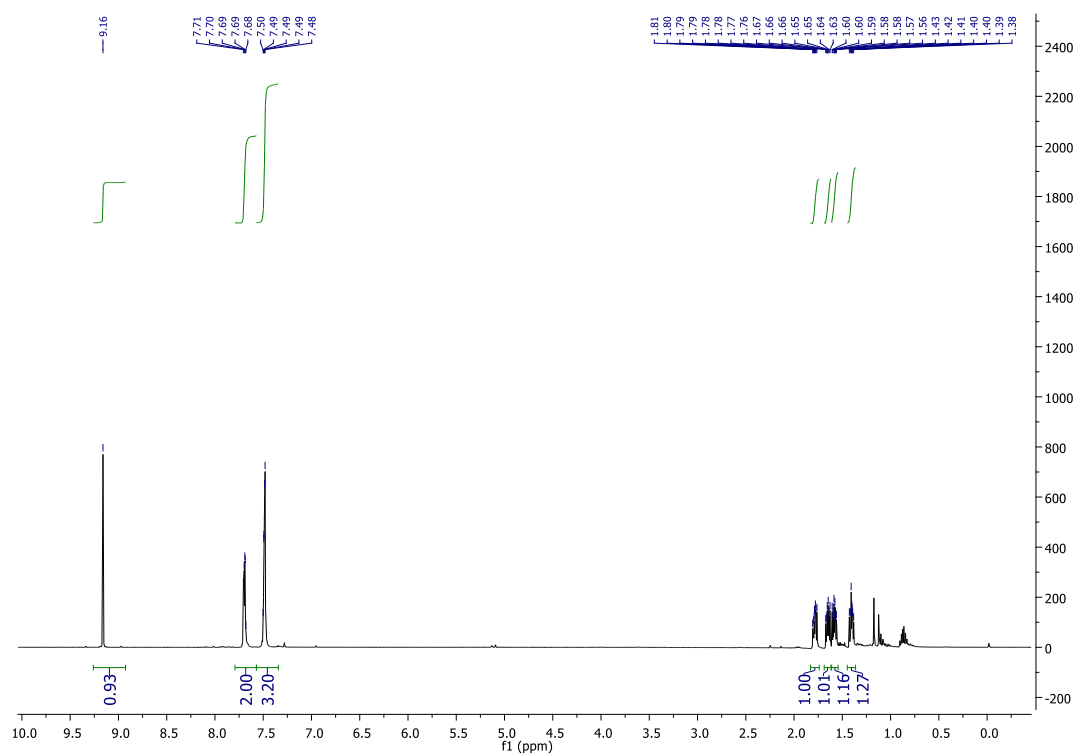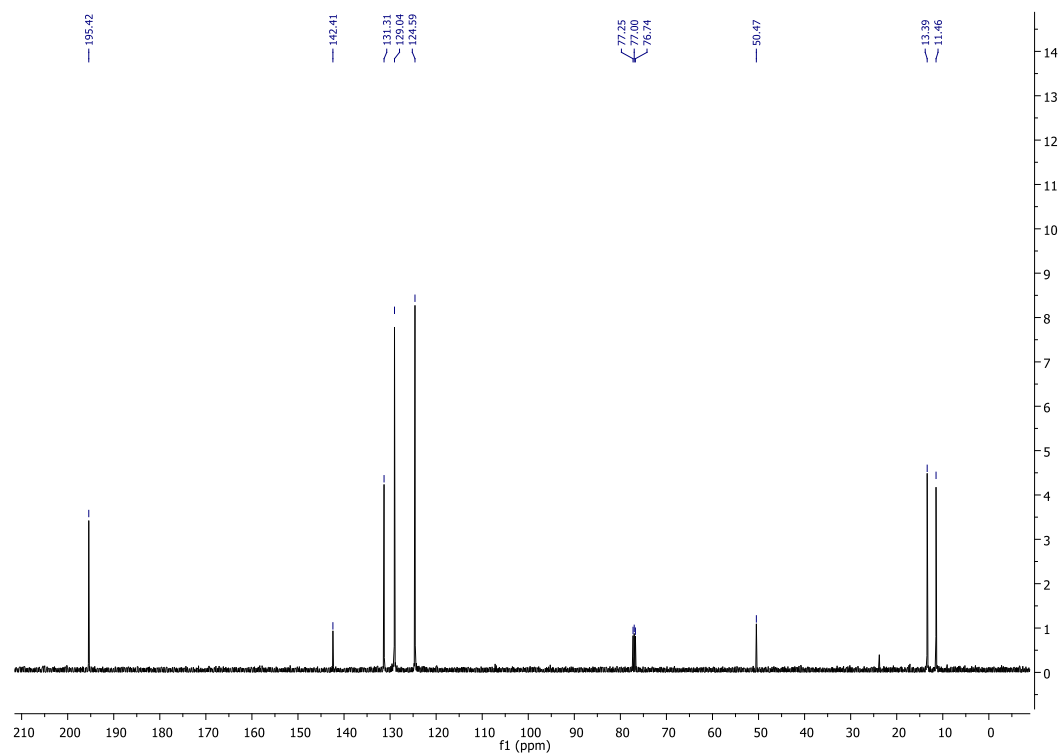

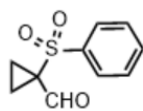

5 1-(phenylsulfonyl)cyclopropanecarbaldehyde

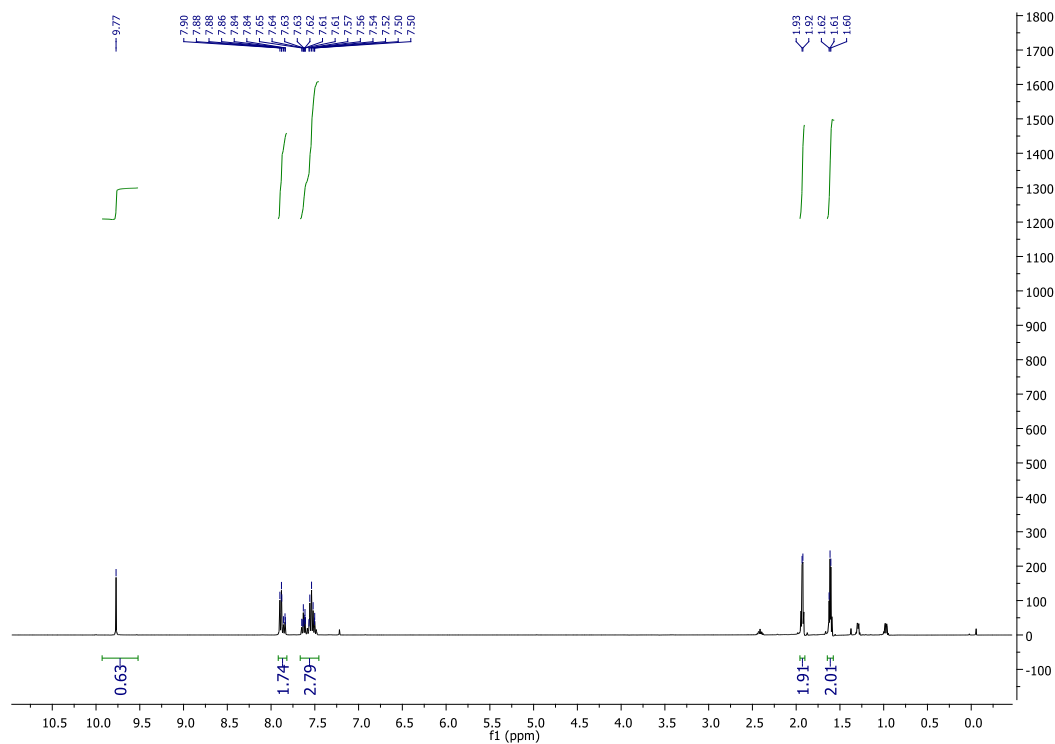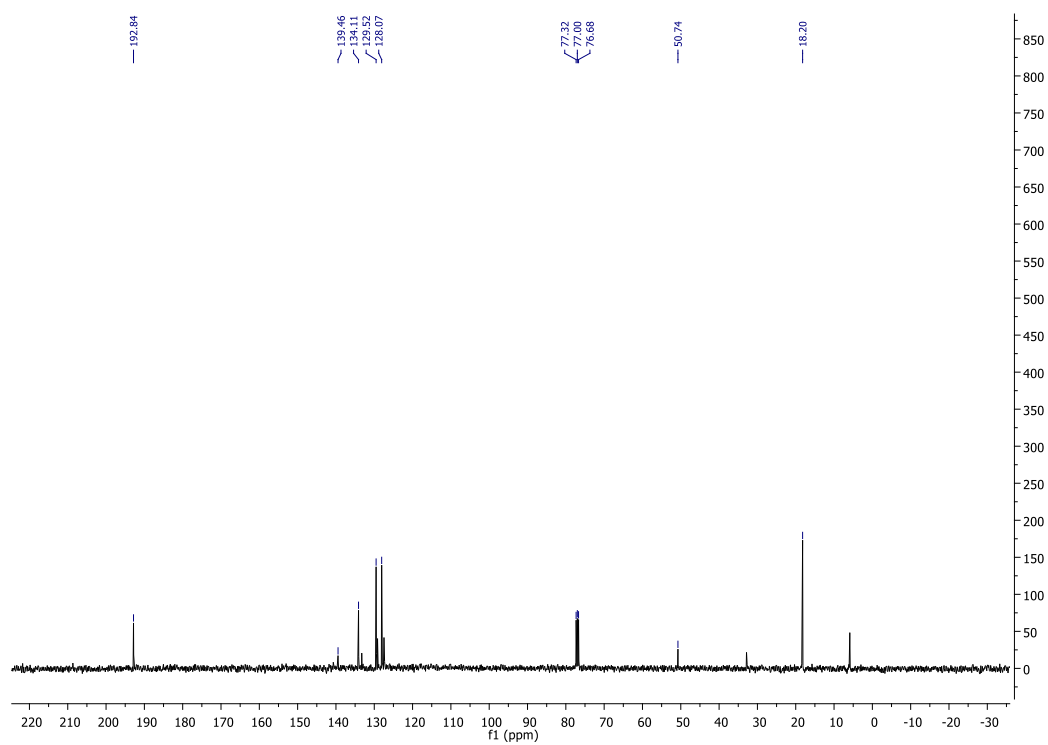



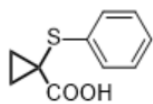

6 1-(phenylthio)cyclopropanecarboxylic acid

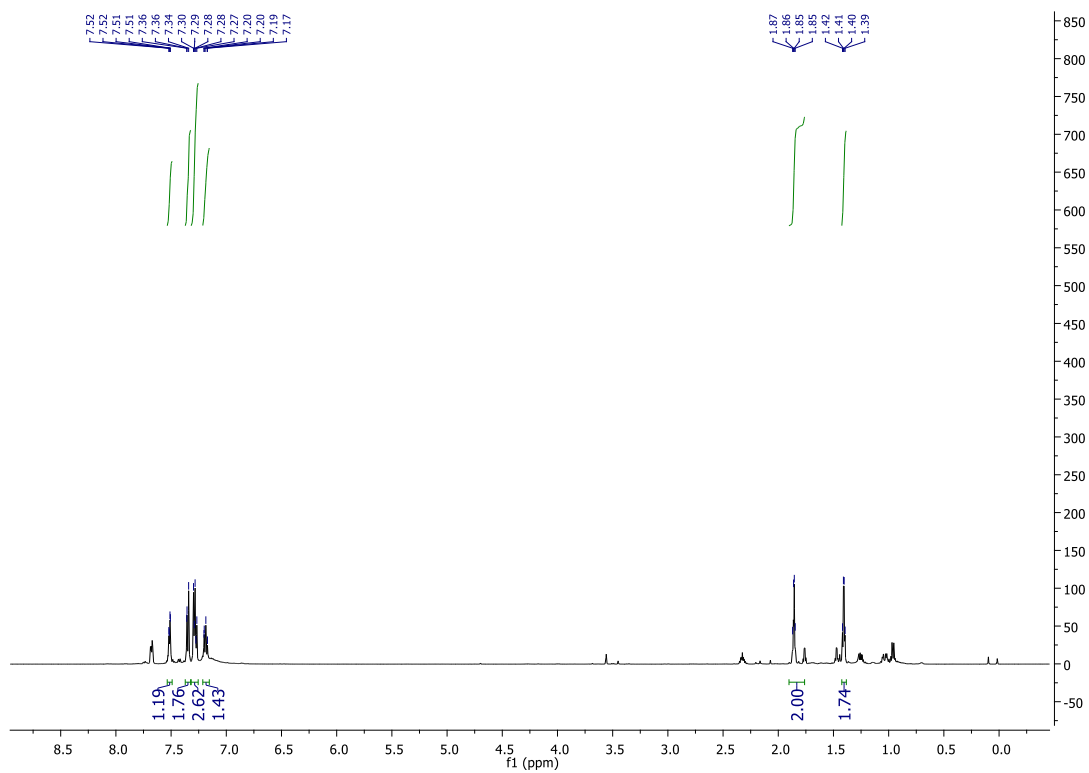

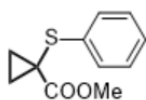

7 methyl 1-(phenylthio)cyclopropanecarboxylate

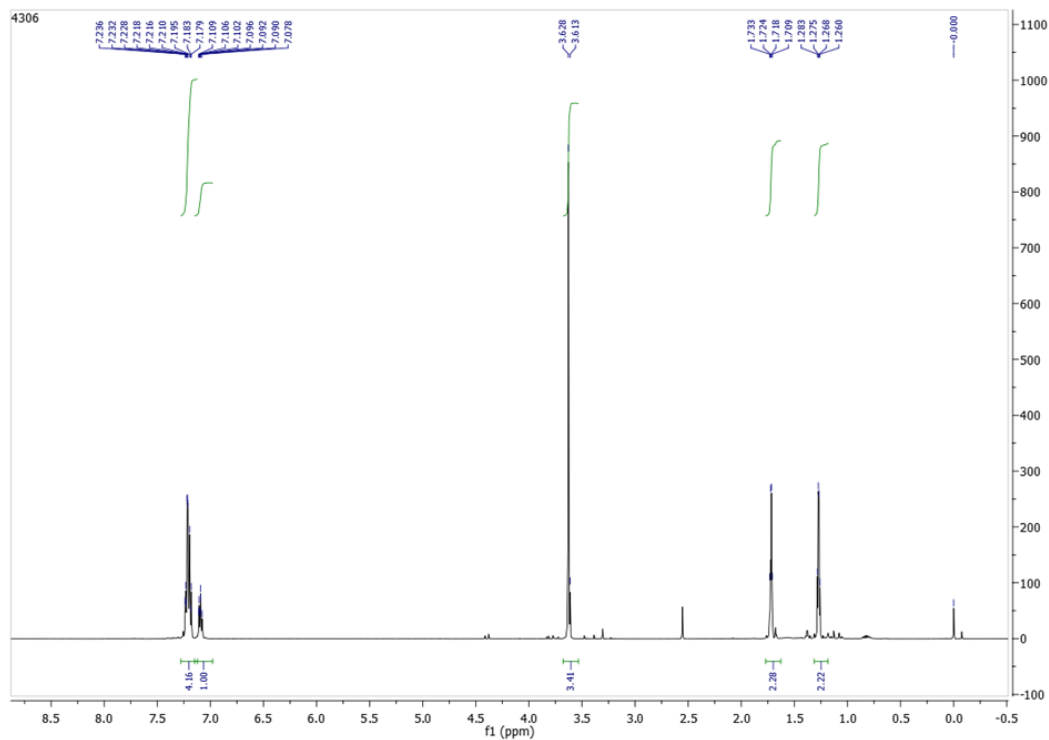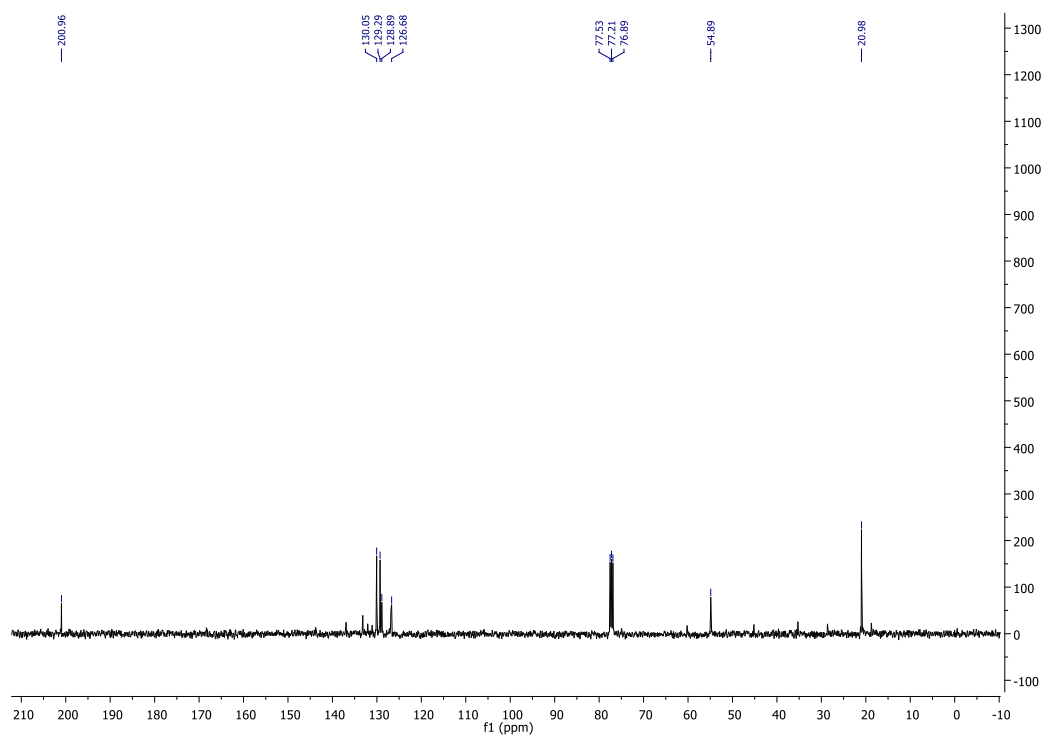

## 8. References and notes

- 1) Kazakevich, Y. V.; Lobrutto, R. *HPLC for Pharmaceutical Scientists*; John Wiley & Sons, Inc.: Hoboken, New Jersey, 2007
- 2) P.F. Siril, H.E. Cross, D.R. Brown, *J. Mol. Catal. A: Chem.*, 2008, 279, 63-68.
- 3) Mu. Naushad, Z.A. ALOthman, M.R. Khana, N.J. ALQahtani, I.H. ALSohaimi. *J. Industrial Eng. Chem.*, **2014**, 20, 4393-4400.
- 4) S. Jin Oh, J. Park, J.G. Na, Y.K. Oh, Y.K. Chang, *RSC Adv.*, **2015**, 5, 47983-47989.
- 5) S. Ye, C. Ding, C. Li, *Adv. Inorg. Chem.*, **2019**, 74, 2019, 3-59.

Sample: campione Cagliari macinato  
Operator:  
Submitter:  
File: C:\ASAP 2020 Plus\data\Chiappone\2022-1...\000-223.SMP

|                      |                         |                         |                                  |
|----------------------|-------------------------|-------------------------|----------------------------------|
| Started:             | 19/10/2022 11:35:41     | Analysis adsorptive:    | N2                               |
| Completed:           | 19/10/2022 16:31:25     | Analysis bath temp.:    | 77,188 K                         |
| Report time:         | 20/10/2022 18:25:04     | Thermal correction:     | No                               |
| Sample mass:         | 0,3526 g                | Ambient free space:     | 15,7578 cm <sup>3</sup> Measured |
| Analysis free space: | 45,2933 cm <sup>3</sup> | Equilibration interval: | 10 s                             |
| Low pressure dose:   | None                    | Sample density:         | 1,000 g/cm <sup>3</sup>          |
| Automatic degas:     | Yes                     |                         |                                  |

| Sample prep: Stage | Temperature (°C) | Ramp Rate (°C/min) | Time (min) |
|--------------------|------------------|--------------------|------------|
| 1                  | 30               | 10                 | 10         |

### Summary Report

#### Surface Area

Single point surface area at  $p/p^\circ = 0,249708467$ : 4,6473 m<sup>2</sup>/g

BET Surface Area: 4,8426 m<sup>2</sup>/g

Langmuir Surface Area: 44,3943 m<sup>2</sup>/g

t-Plot Micropore Area: 0,0744 m<sup>2</sup>/g

t-Plot external surface area: 4,7682 m<sup>2</sup>/g

BJH Adsorption cumulative surface area of pores  
between 1,7000 nm and 300,0000 nm width: 4,0304 m<sup>2</sup>/g

BJH Desorption cumulative surface area of pores  
between 1,7000 nm and 300,0000 nm width: 3,9755 m<sup>2</sup>/g

D-H Adsorption cumulative surface area of pores  
between 1,7000 nm and 300,0000 nm width: 3,9505 m<sup>2</sup>/g

D-H Desorption cumulative surface area of pores  
between 1,7000 nm and 300,0000 nm width: 3,8925 m<sup>2</sup>/g

#### Pore Volume

Single point adsorption total pore volume of pores  
less than 40,3122 nm width at  $p/p^\circ = 0,950000000$ : 0,010168 cm<sup>3</sup>/g

Single point desorption total pore volume of pores  
less than 40,3122 nm width at  $p/p^\circ = 0,950000000$ : 0,014914 cm<sup>3</sup>/g

t-Plot micropore volume: -0,000020 cm<sup>3</sup>/g

BJH Adsorption cumulative volume of pores  
between 1,7000 nm and 300,0000 nm width: 0,037288 cm<sup>3</sup>/g

BJH Desorption cumulative volume of pores  
between 1,7000 nm and 300,0000 nm width: 0,037100 cm<sup>3</sup>/g

D-H Adsorption cumulative volume of pores  
between 1,7000 nm and 300,0000 nm width: 0,037118 cm<sup>3</sup>/g

D-H Desorption cumulative volume of pores

Sample: campione Cagliari macinato  
Operator:  
Submitter:  
File: C:\ASAP 2020 Plus\data\Chiappone\2022-1...\000-223.SMP

|                      |                         |                         |                                  |
|----------------------|-------------------------|-------------------------|----------------------------------|
| Started:             | 19/10/2022 11:35:41     | Analysis adsorptive:    | N2                               |
| Completed:           | 19/10/2022 16:31:25     | Analysis bath temp.:    | 77,188 K                         |
| Report time:         | 20/10/2022 18:25:04     | Thermal correction:     | No                               |
| Sample mass:         | 0,3526 g                | Ambient free space:     | 15,7578 cm <sup>3</sup> Measured |
| Analysis free space: | 45,2933 cm <sup>3</sup> | Equilibration interval: | 10 s                             |
| Low pressure dose:   | None                    | Sample density:         | 1,000 g/cm <sup>3</sup>          |
| Automatic degas:     | Yes                     |                         |                                  |

| Sample prep: Stage | Temperature (°C) | Ramp Rate (°C/min) | Time (min) |
|--------------------|------------------|--------------------|------------|
| 1                  | 30               | 10                 | 10         |

#### Pore Volume

between 1,7000 nm and 300,0000 nm width: 0,036903 cm<sup>3</sup>/g

#### Pore Size

Adsorption average pore diameter (4V/A by BET): 8,3986 nm

Desorption average pore diameter (4V/A by BET): 12,3194 nm

BJH Adsorption average pore width (4V/A): 37,0067 nm

BJH Desorption average pore width (4V/A): 37,3295 nm

D-H Adsorption average pore width (4V/A): 37,5833 nm

D-H Desorption average pore width (4V/A): 37,9220 nm

#### Freundlich

Qm·C: 0,0882 ± 0,0207 cm<sup>3</sup>/g STP

m: 1,6853 ± 0,2715

#### Temkin

q·alpha/Qm: 0,280312 ± 0,096339 kJ/mol·(cm<sup>3</sup>/g STP)

A: 0,0218 ± 0,0512 mmHg

#### Nanoparticle Size:

Average Particle Size 1.239,0035 nm

#### Horvath-Kawazoe

Maximum pore volume at p/p° = 0,179888289: 0,002005 cm<sup>3</sup>/g

Median pore width: 0,7889 nm

#### MP-Method

Cumulative surface area of pores between  
1,96327 nm and 1,96327 nm hydraulic radius: 0,0000 m<sup>2</sup>/g

Cumulative pore volume of pores between

Sample: campione Cagliari macinato

Operator:

Submitter:

File: C:\ASAP 2020 Plus\data\Chiappone\2022-1...\000-223.SMP

|                      |                         |                         |                                  |
|----------------------|-------------------------|-------------------------|----------------------------------|
| Started:             | 19/10/2022 11:35:41     | Analysis adsorptive:    | N2                               |
| Completed:           | 19/10/2022 16:31:25     | Analysis bath temp.:    | 77,188 K                         |
| Report time:         | 20/10/2022 18:25:04     | Thermal correction:     | No                               |
| Sample mass:         | 0,3526 g                | Ambient free space:     | 15,7578 cm <sup>3</sup> Measured |
| Analysis free space: | 45,2933 cm <sup>3</sup> | Equilibration interval: | 10 s                             |
| Low pressure dose:   | None                    | Sample density:         | 1,000 g/cm <sup>3</sup>          |
| Automatic degas:     | Yes                     |                         |                                  |

| Sample prep: Stage | Temperature (°C) | Ramp Rate (°C/min) | Time (min) |
|--------------------|------------------|--------------------|------------|
| 1                  | 30               | 10                 | 10         |

## MP-Method

1,96327 nm and 1,96327 nm hydraulic radius: 0,000000 cm<sup>3</sup>/g

Average pore hydraulic radius (V/A): 0,00000 nm

Sample: campione Cagliari macinato  
Operator:  
Submitter:  
File: C:\ASAP 2020 Plus\data\Chiappone\2022-1...\000-223.SMP

|                      |                         |                         |                                  |
|----------------------|-------------------------|-------------------------|----------------------------------|
| Started:             | 19/10/2022 11:35:41     | Analysis adsorptive:    | N2                               |
| Completed:           | 19/10/2022 16:31:25     | Analysis bath temp.:    | 77,188 K                         |
| Report time:         | 20/10/2022 18:25:04     | Thermal correction:     | No                               |
| Sample mass:         | 0,3526 g                | Ambient free space:     | 15,7578 cm <sup>3</sup> Measured |
| Analysis free space: | 45,2933 cm <sup>3</sup> | Equilibration interval: | 10 s                             |
| Low pressure dose:   | None                    | Sample density:         | 1,000 g/cm <sup>3</sup>          |
| Automatic degas:     | Yes                     |                         |                                  |

|                    |                  |                    |            |
|--------------------|------------------|--------------------|------------|
| Sample prep: Stage | Temperature (°C) | Ramp Rate (°C/min) | Time (min) |
| 1                  | 30               | 10                 | 10         |

## Isotherm Tabular Report

| Relative Pressure (p/p°) | Absolute Pressure (mmHg) | Quantity Adsorbed (cm <sup>3</sup> /g STP) | Elapsed Time (h:min) | Saturation Pressure (mmHg) |
|--------------------------|--------------------------|--------------------------------------------|----------------------|----------------------------|
| 0.011463180              | 8.555197                 | 0.6789                                     | 01:31                | 747.010742                 |
| 0.033786418              | 25.212904                | 0.8733                                     | 01:49                | 746.319702                 |
| 0.068677282              | 51.249722                | 1.0232                                     | 01:52                | 746.243774                 |
| 0.079940468              | 59.651485                | 1.0618                                     | 01:54                | 746.239807                 |
| 0.100049911              | 74.653831                | 1.1201                                     | 01:56                | 746.198853                 |
| 0.120504693              | 89.912277                | 1.1715                                     | 01:59                | 746.165894                 |
| 0.140480737              | 104.813515               | 1.2151                                     | 02:01                | 746.130920                 |
| 0.159878107              | 119.280426               | 1.2582                                     | 02:03                | 746.105957                 |
| 0.179888289              | 134.200638               | 1.2963                                     | 02:05                | 746.071045                 |
| 0.200381282              | 149.487457               | 1.3365                                     | 02:07                | 746.022095                 |
| 0.249708467              | 186.282547               | 1.4231                                     | 02:10                | 746.015076                 |
| 0.300568445              | 224.212997               | 1.5032                                     | 02:12                | 746.000122                 |
| 0.350704638              | 261.594879               | 1.5874                                     | 02:14                | 745.963196                 |
| 0.401172050              | 299.235931               | 1.6693                                     | 02:16                | 745.912231                 |
| 0.451228599              | 336.567017               | 1.7547                                     | 02:18                | 745.904236                 |
| 0.501302383              | 373.881531               | 1.8446                                     | 02:21                | 745.890259                 |
| 0.551384683              | 411.206940               | 1.9417                                     | 02:23                | 745.820374                 |
| 0.601216792              | 448.366119               | 2.0440                                     | 02:25                | 745.771423                 |
| 0.651562704              | 485.951324               | 2.1607                                     | 02:27                | 745.764465                 |
| 0.701638381              | 523.206482               | 2.2953                                     | 02:30                | 745.824341                 |
| 0.751620244              | 560.521118               | 2.4638                                     | 02:32                | 745.692505                 |
| 0.801605580              | 597.780090               | 2.6811                                     | 02:34                | 745.750427                 |
| 0.821077936              | 612.285645               | 2.6811                                     | 02:37                | 745.728455                 |
| 0.851339039              | 634.834595               | 2.8020                                     | 02:39                | 745.709534                 |
| 0.875950060              | 653.130798               | 3.0346                                     | 02:41                | 745.689514                 |
| 0.900785272              | 671.631470               | 3.3207                                     | 02:43                | 745.625610                 |
| 0.925324796              | 689.895996               | 3.7930                                     | 02:46                | 745.606628                 |
| 0.949165249              | 707.694458               | 4.6745                                     | 02:49                | 745.571716                 |
| 0.971491871              | 724.288696               | 6.4900                                     | 02:52                | 745.596680                 |
| 0.981754511              | 731.840942               | 10.5363                                    | 02:58                | 745.542725                 |
| 0.990077856              | 737.964417               | 14.2059                                    | 03:04                | 745.441895                 |
| 0.994727279              | 741.368286               | 19.1602                                    | 03:11                | 745.359985                 |
| 0.985858928              | 734.685913               | 24.3458                                    | 03:19                | 745.298035                 |
| 0.977057333              | 728.027222               | 20.6075                                    | 03:25                | 745.224182                 |
| 0.968199114              | 721.408386               | 16.5585                                    | 03:31                | 745.122314                 |
| 0.948730941              | 706.843811               | 13.4947                                    | 03:37                | 745.103333                 |
| 0.927893090              | 691.310425               | 9.4527                                     | 03:44                | 745.041382                 |
| 0.902313792              | 672.220581               | 6.9240                                     | 03:48                | 745.032410                 |
| 0.876533438              | 652.990662               | 5.1545                                     | 03:52                | 744.996460                 |
|                          |                          | 4.1393                                     | 03:55                | 744.969482                 |



Sample: campione Cagliari macinato  
Operator:  
Submitter:  
File: C:\ASAP 2020 Plus\data\Chiappone\2022-1...\000-223.SMP

|                                              |                                                      |
|----------------------------------------------|------------------------------------------------------|
| Started: 19/10/2022 11:35:41                 | Analysis adsorptive: N2                              |
| Completed: 19/10/2022 16:31:25               | Analysis bath temp.: 77,188 K                        |
| Report time: 20/10/2022 18:25:04             | Thermal correction: No                               |
| Sample mass: 0,3526 g                        | Ambient free space: 15,7578 cm <sup>3</sup> Measured |
| Analysis free space: 45,2933 cm <sup>3</sup> | Equilibration interval: 10 s                         |
| Low pressure dose: None                      | Sample density: 1,000 g/cm <sup>3</sup>              |
| Automatic degas: Yes                         |                                                      |

|                    |                  |                    |            |
|--------------------|------------------|--------------------|------------|
| Sample prep: Stage | Temperature (°C) | Ramp Rate (°C/min) | Time (min) |
| 1                  | 30               | 10                 | 10         |

## Isotherm Tabular Report

| Relative Pressure (p/p°) | Absolute Pressure (mmHg) | Quantity Adsorbed (cm <sup>3</sup> /g STP) | Elapsed Time (h:min) | Saturation Pressure (mmHg) |
|--------------------------|--------------------------|--------------------------------------------|----------------------|----------------------------|
| 0.850921480              | 633.879944               | 3.5321                                     | 03:57                | 744.933533                 |
| 0.825097887              | 614.635681               | 3.1572                                     | 04:00                | 744.924561                 |
| 0.799824169              | 595.811890               | 2.9126                                     | 04:02                | 744.928589                 |
| 0.748994636              | 557.941528               | 2.6143                                     | 04:04                | 744.920593                 |
| 0.699390626              | 520.963928               | 2.4242                                     | 04:06                | 744.882629                 |
| 0.649343422              | 483.685944               | 2.2770                                     | 04:08                | 744.884644                 |
| 0.599136154              | 446.272949               | 2.1556                                     | 04:11                | 744.860657                 |
| 0.549312877              | 409.151123               | 2.0577                                     | 04:13                | 744.841675                 |
| 0.499387315              | 371.969971               | 1.9610                                     | 04:16                | 744.852661                 |
| 0.449446438              | 334.769592               | 1.8705                                     | 04:18                | 744.848694                 |
| 0.398771023              | 297.011322               | 1.7859                                     | 04:20                | 744.816711                 |
| 0.348918623              | 259.875885               | 1.7025                                     | 04:22                | 744.803711                 |
| 0.299239082              | 222.872589               | 1.6238                                     | 04:24                | 744.797729                 |
| 0.249363158              | 185.725372               | 1.5426                                     | 04:26                | 744.798767                 |
| 0.199605126              | 148.663849               | 1.4548                                     | 04:29                | 744.789734                 |
| 0.139601128              | 103.971817               | 1.3458                                     | 04:32                | 744.777771                 |
| 0.100013469              | 74.486710                | 1.2505                                     | 04:35                | 744.766785                 |

Sample: campione Cagliari macinato

Operator:

Submitter:

File: C:\ASAP 2020 Plus\data\Chiappone\2022-1...\000-223.SMP

|                      |                         |                         |                                  |
|----------------------|-------------------------|-------------------------|----------------------------------|
| Started:             | 19/10/2022 11:35:41     | Analysis adsorptive:    | N2                               |
| Completed:           | 19/10/2022 16:31:25     | Analysis bath temp.:    | 77,188 K                         |
| Report time:         | 20/10/2022 18:25:04     | Thermal correction:     | No                               |
| Sample mass:         | 0,3526 g                | Ambient free space:     | 15,7578 cm <sup>3</sup> Measured |
| Analysis free space: | 45,2933 cm <sup>3</sup> | Equilibration interval: | 10 s                             |
| Low pressure dose:   | None                    | Sample density:         | 1,000 g/cm <sup>3</sup>          |
| Automatic degas:     | Yes                     |                         |                                  |

Sample prep: Stage  
1

Temperature (°C)  
30

Ramp Rate (°C/min)  
10

Time (min)  
10

### Isotherm Linear Plot

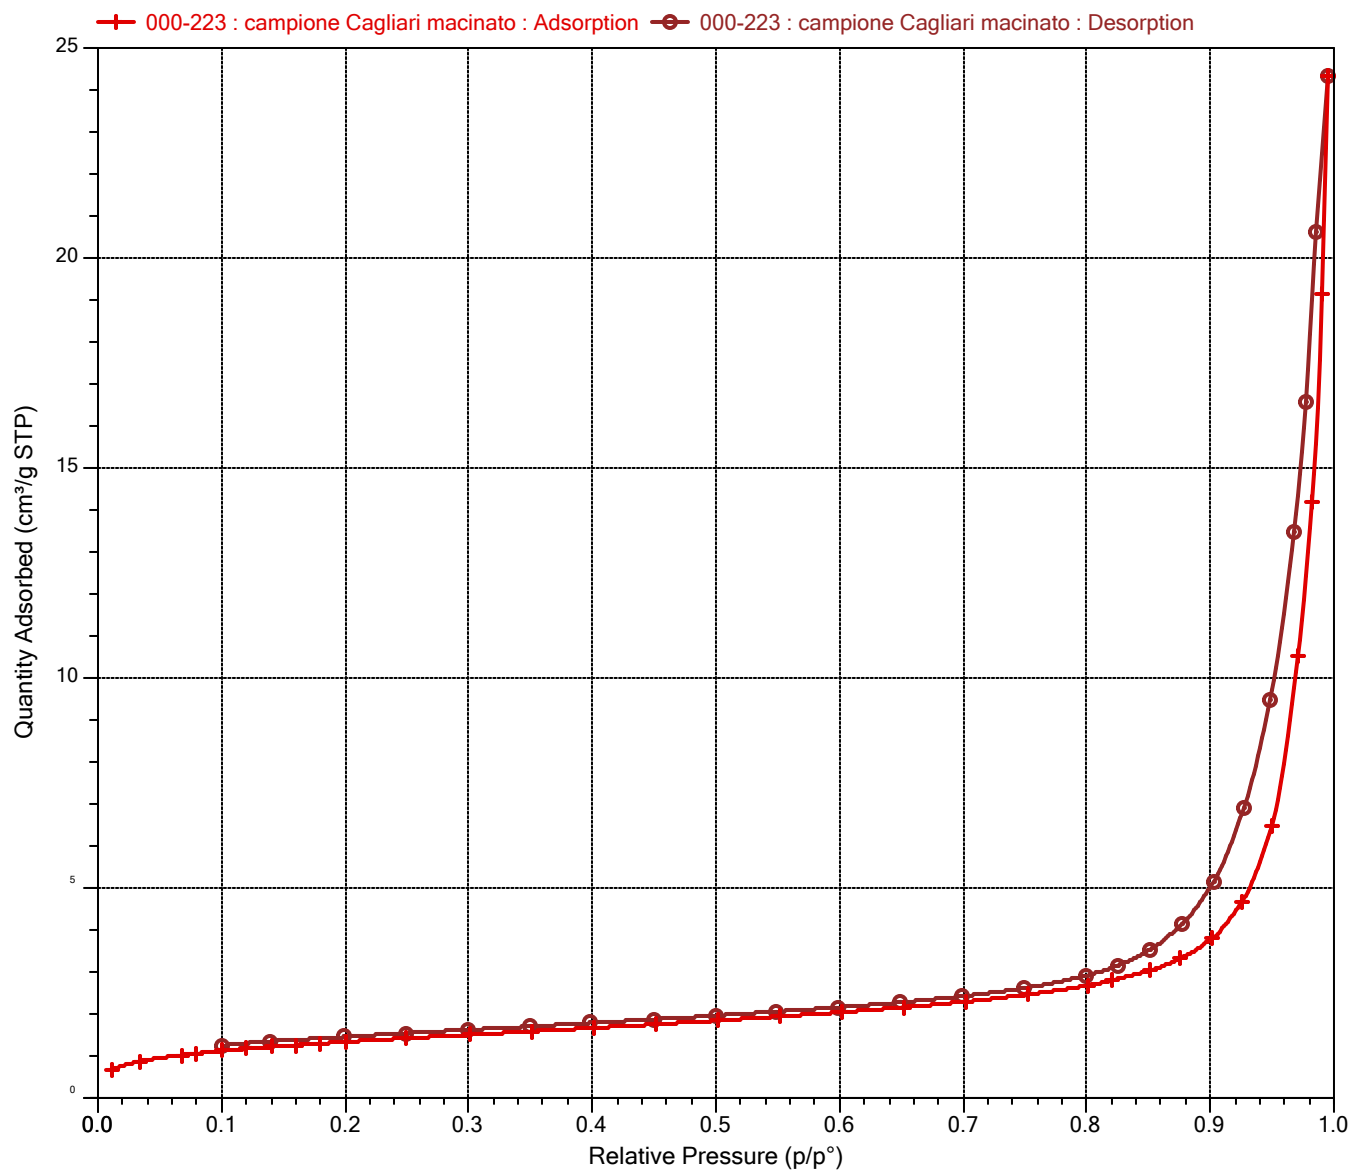

Sample: campione Cagliari macinato

Operator:

Submitter:

File: C:\ASAP 2020 Plus\data\Chiappone\2022-1...\000-223.SMP

|                      |                         |                         |                                  |
|----------------------|-------------------------|-------------------------|----------------------------------|
| Started:             | 19/10/2022 11:35:41     | Analysis adsorptive:    | N2                               |
| Completed:           | 19/10/2022 16:31:25     | Analysis bath temp.:    | 77,188 K                         |
| Report time:         | 20/10/2022 18:25:04     | Thermal correction:     | No                               |
| Sample mass:         | 0,3526 g                | Ambient free space:     | 15,7578 cm <sup>3</sup> Measured |
| Analysis free space: | 45,2933 cm <sup>3</sup> | Equilibration interval: | 10 s                             |
| Low pressure dose:   | None                    | Sample density:         | 1,000 g/cm <sup>3</sup>          |
| Automatic degas:     | Yes                     |                         |                                  |

Sample prep: Stage  
1

Temperature (°C)  
30

Ramp Rate (°C/min)  
10

Time (min)  
10

### Isotherm Log Plot

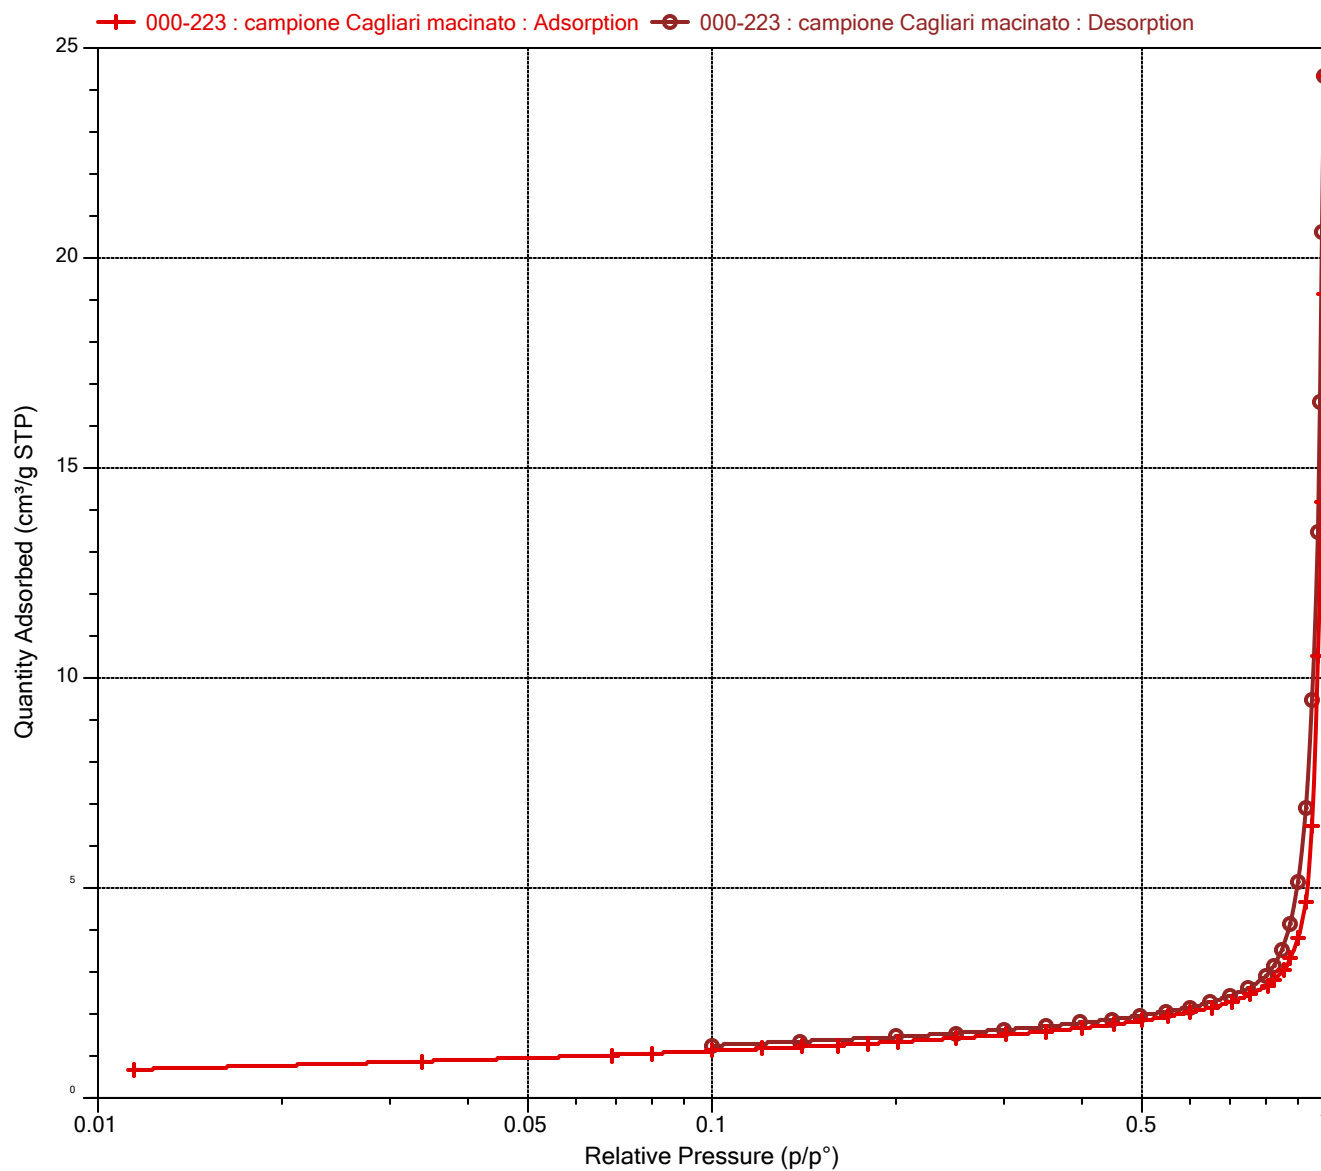

Sample: campione Cagliari macinato

Operator:

Submitter:

File: C:\ASAP 2020 Plus\data\Chiappone\2022-1...\000-223.SMP

|                      |                         |                         |                                  |
|----------------------|-------------------------|-------------------------|----------------------------------|
| Started:             | 19/10/2022 11:35:41     | Analysis adsorptive:    | N2                               |
| Completed:           | 19/10/2022 16:31:25     | Analysis bath temp.:    | 77,188 K                         |
| Report time:         | 20/10/2022 18:25:04     | Thermal correction:     | No                               |
| Sample mass:         | 0,3526 g                | Ambient free space:     | 15,7578 cm <sup>3</sup> Measured |
| Analysis free space: | 45,2933 cm <sup>3</sup> | Equilibration interval: | 10 s                             |
| Low pressure dose:   | None                    | Sample density:         | 1,000 g/cm <sup>3</sup>          |
| Automatic degas:     | Yes                     |                         |                                  |

Sample prep: Stage  
1

Temperature (°C)  
30

Ramp Rate (°C/min)  
10

Time (min)  
10

### Isotherm Linear Absolute Plot

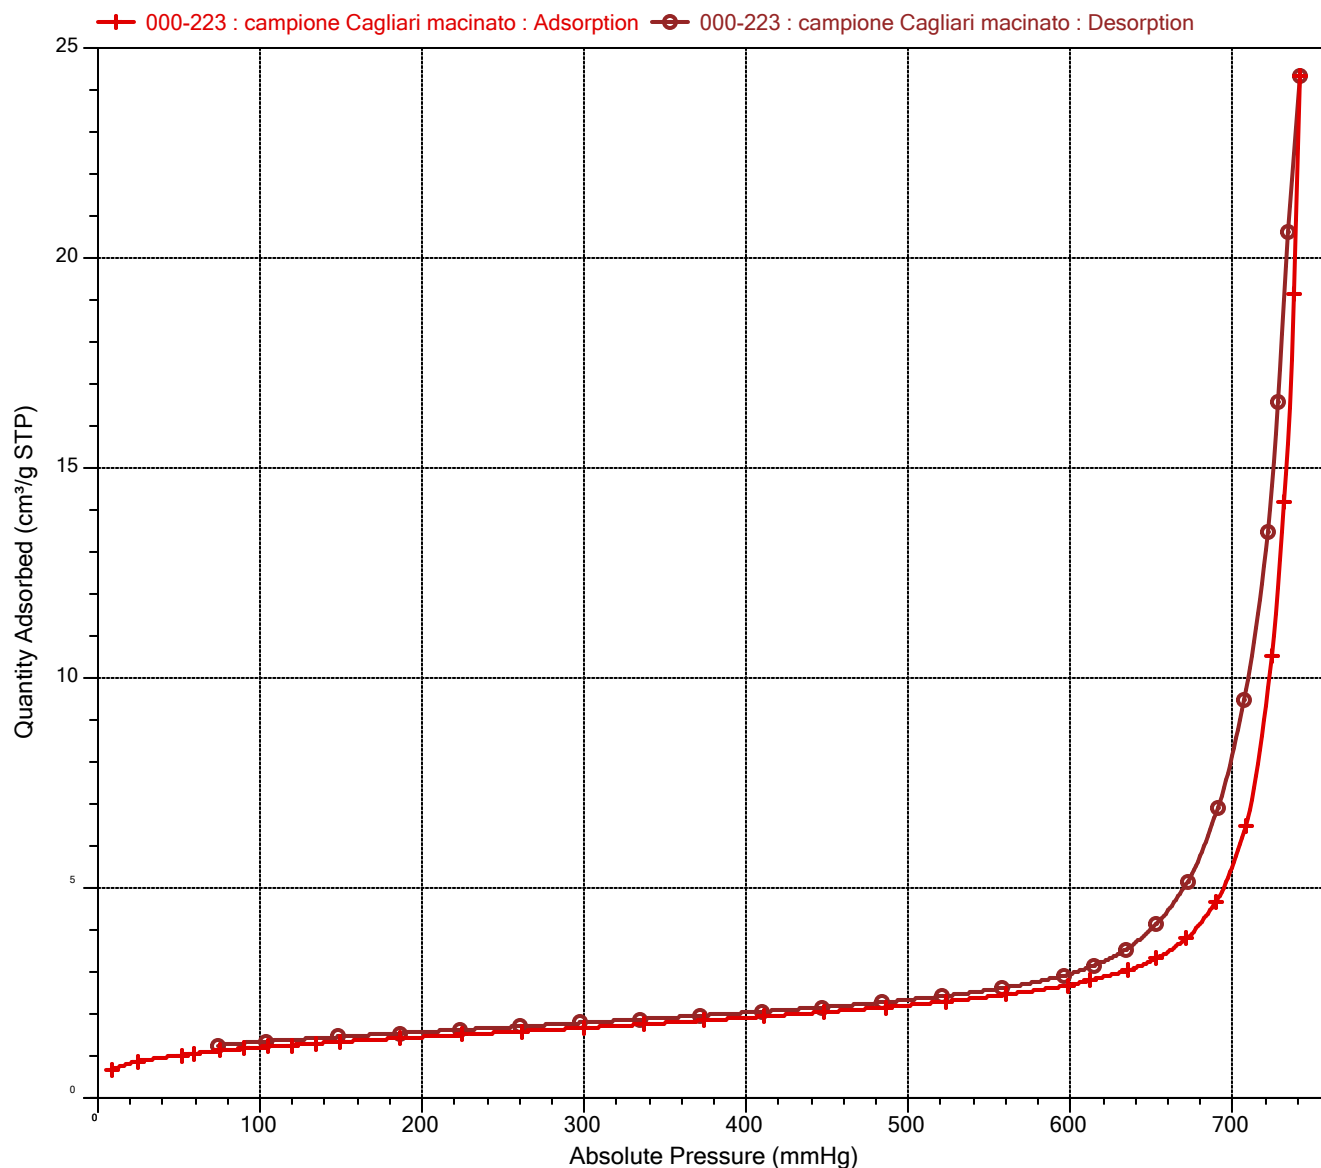

Sample: campione Cagliari macinato

Operator:

Submitter:

File: C:\ASAP 2020 Plus\data\Chiappone\2022-1...\000-223.SMP

|                      |                         |                         |                                  |
|----------------------|-------------------------|-------------------------|----------------------------------|
| Started:             | 19/10/2022 11:35:41     | Analysis adsorptive:    | N2                               |
| Completed:           | 19/10/2022 16:31:25     | Analysis bath temp.:    | 77,188 K                         |
| Report time:         | 20/10/2022 18:25:04     | Thermal correction:     | No                               |
| Sample mass:         | 0,3526 g                | Ambient free space:     | 15,7578 cm <sup>3</sup> Measured |
| Analysis free space: | 45,2933 cm <sup>3</sup> | Equilibration interval: | 10 s                             |
| Low pressure dose:   | None                    | Sample density:         | 1,000 g/cm <sup>3</sup>          |
| Automatic degas:     | Yes                     |                         |                                  |

Sample prep: Stage  
1

Temperature (°C)  
30

Ramp Rate (°C/min)  
10

Time (min)  
10

### Isotherm Log Absolute Plot

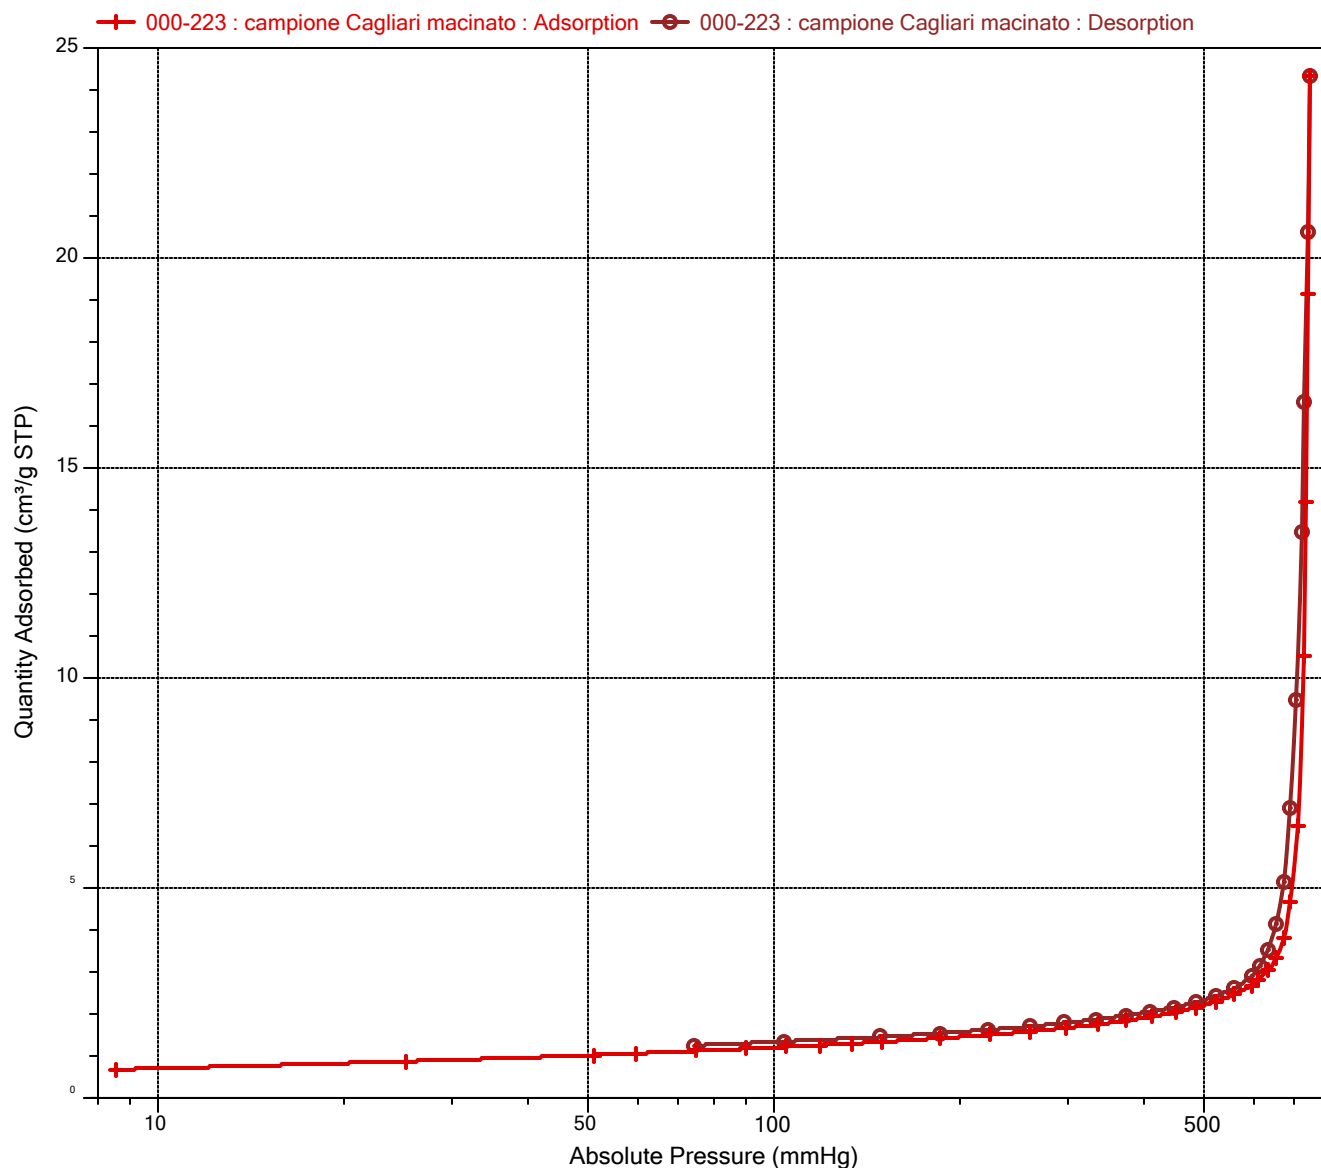

Sample: campione Cagliari macinato

Operator:

Submitter:

File: C:\ASAP 2020 Plus\data\Chiappone\2022-1...\000-223.SMP

|                      |                         |                         |                                  |
|----------------------|-------------------------|-------------------------|----------------------------------|
| Started:             | 19/10/2022 11:35:41     | Analysis adsorptive:    | N2                               |
| Completed:           | 19/10/2022 16:31:25     | Analysis bath temp.:    | 77,188 K                         |
| Report time:         | 20/10/2022 18:25:04     | Thermal correction:     | No                               |
| Sample mass:         | 0,3526 g                | Ambient free space:     | 15,7578 cm <sup>3</sup> Measured |
| Analysis free space: | 45,2933 cm <sup>3</sup> | Equilibration interval: | 10 s                             |
| Low pressure dose:   | None                    | Sample density:         | 1,000 g/cm <sup>3</sup>          |
| Automatic degas:     | Yes                     |                         |                                  |

Sample prep: Stage  
1

Temperature (°C)  
30

Ramp Rate (°C/min)  
10

Time (min)  
10

### Isotherm Pressure Composition

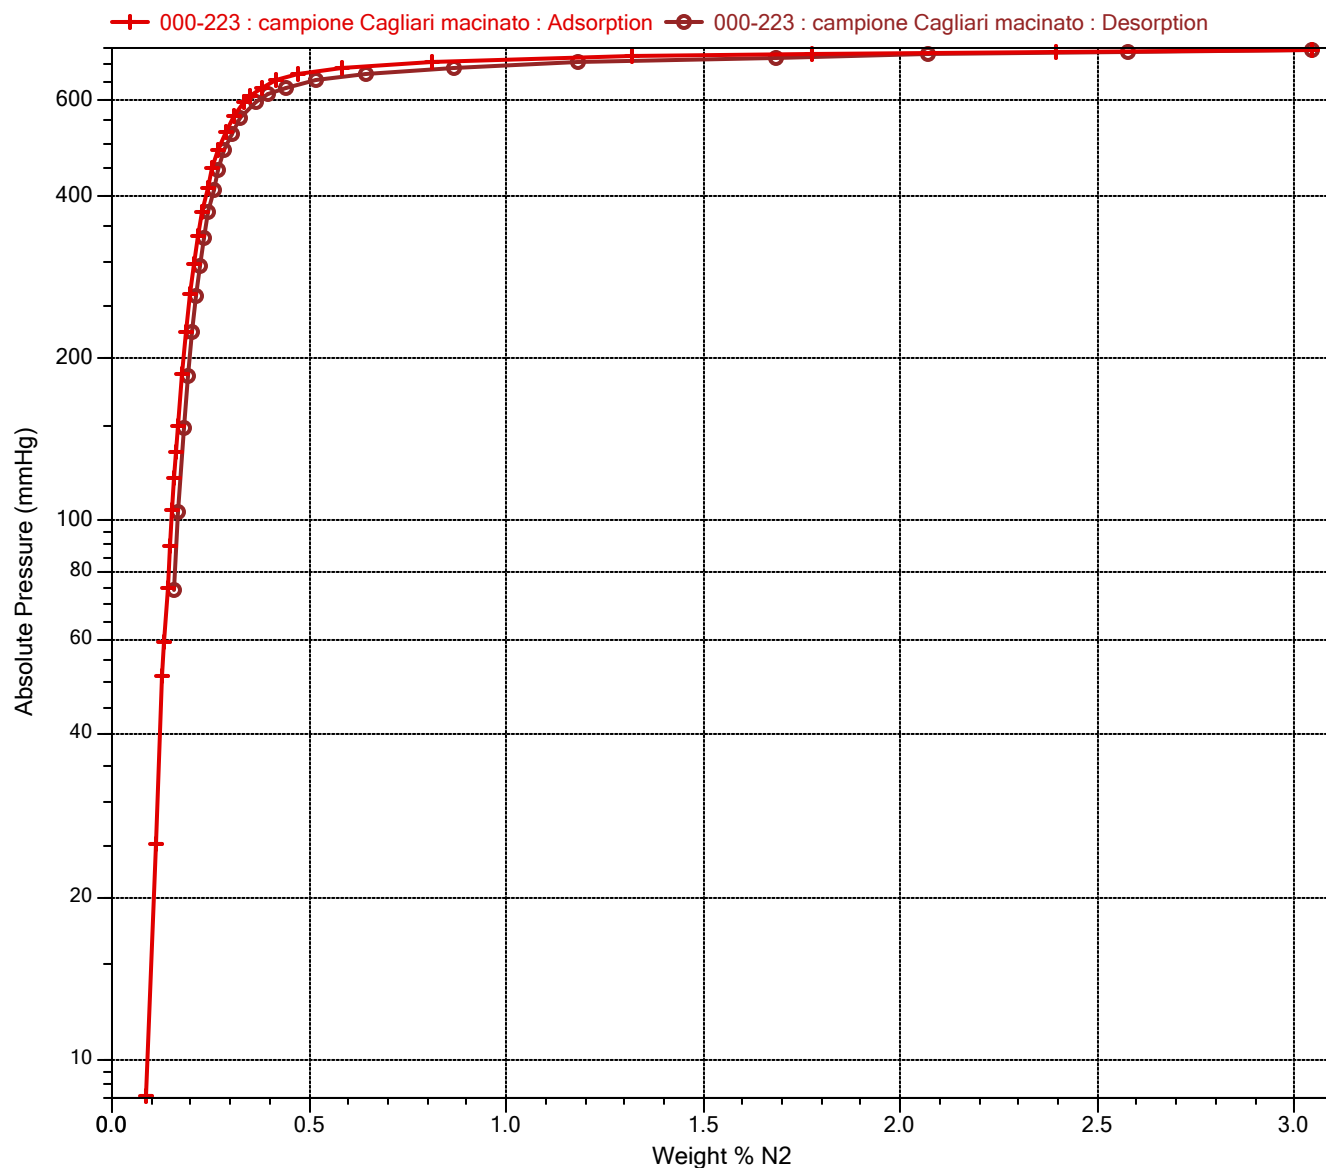

Sample: campione Cagliari macinato

Operator:

Submitter:

File: C:\ASAP 2020 Plus\data\Chiappone\2022-1...\000-223.SMP

|                      |                         |                         |                                  |
|----------------------|-------------------------|-------------------------|----------------------------------|
| Started:             | 19/10/2022 11:35:41     | Analysis adsorptive:    | N2                               |
| Completed:           | 19/10/2022 16:31:25     | Analysis bath temp.:    | 77,188 K                         |
| Report time:         | 20/10/2022 18:25:04     | Thermal correction:     | No                               |
| Sample mass:         | 0,3526 g                | Ambient free space:     | 15,7578 cm <sup>3</sup> Measured |
| Analysis free space: | 45,2933 cm <sup>3</sup> | Equilibration interval: | 10 s                             |
| Low pressure dose:   | None                    | Sample density:         | 1,000 g/cm <sup>3</sup>          |
| Automatic degas:     | Yes                     |                         |                                  |

| Sample prep: Stage | Temperature (°C) | Ramp Rate (°C/min) | Time (min) |
|--------------------|------------------|--------------------|------------|
| 1                  | 30               | 10                 | 10         |

## BET Report

BET surface area: 4,8426 ± 0,0324 m<sup>2</sup>/g  
 Slope: 0,888625 ± 0,005942 g/cm<sup>3</sup> STP  
 Y-intercept: 0,010185 ± 0,000920 g/cm<sup>3</sup> STP  
 C: 88,248337  
 Qm: 1,1126 cm<sup>3</sup>/g STP  
 Correlation coefficient: 0,9998435  
 Molecular cross-sectional area: 0,1620 nm<sup>2</sup>

| Relative Pressure<br>(p/p°) | Quantity Adsorbed<br>(cm <sup>3</sup> /g STP) | 1/[Q(p°/p - 1)] |
|-----------------------------|-----------------------------------------------|-----------------|
| 0.068677282                 | 1.0232                                        | 0.072068        |
| 0.079940468                 | 1.0618                                        | 0.081829        |
| 0.100049911                 | 1.1201                                        | 0.099252        |
| 0.120504693                 | 1.1715                                        | 0.116962        |
| 0.140480737                 | 1.2151                                        | 0.134504        |
| 0.159878107                 | 1.2582                                        | 0.151248        |
| 0.179888289                 | 1.2963                                        | 0.169205        |
| 0.200381282                 | 1.3365                                        | 0.187501        |
| 0.249708467                 | 1.4231                                        | 0.233873        |



Sample: campione Cagliari macinato

Operator:

Submitter:

File: C:\ASAP 2020 Plus\data\Chiappone\2022-1...\000-223.SMP

|                      |                         |                         |                                  |
|----------------------|-------------------------|-------------------------|----------------------------------|
| Started:             | 19/10/2022 11:35:41     | Analysis adsorptive:    | N2                               |
| Completed:           | 19/10/2022 16:31:25     | Analysis bath temp.:    | 77,188 K                         |
| Report time:         | 20/10/2022 18:25:04     | Thermal correction:     | No                               |
| Sample mass:         | 0,3526 g                | Ambient free space:     | 15,7578 cm <sup>3</sup> Measured |
| Analysis free space: | 45,2933 cm <sup>3</sup> | Equilibration interval: | 10 s                             |
| Low pressure dose:   | None                    | Sample density:         | 1,000 g/cm <sup>3</sup>          |
| Automatic degas:     | Yes                     |                         |                                  |

Sample prep: Stage  
1

Temperature (°C)  
30

Ramp Rate (°C/min)  
10

Time (min)  
10

BET Surface Area Plot

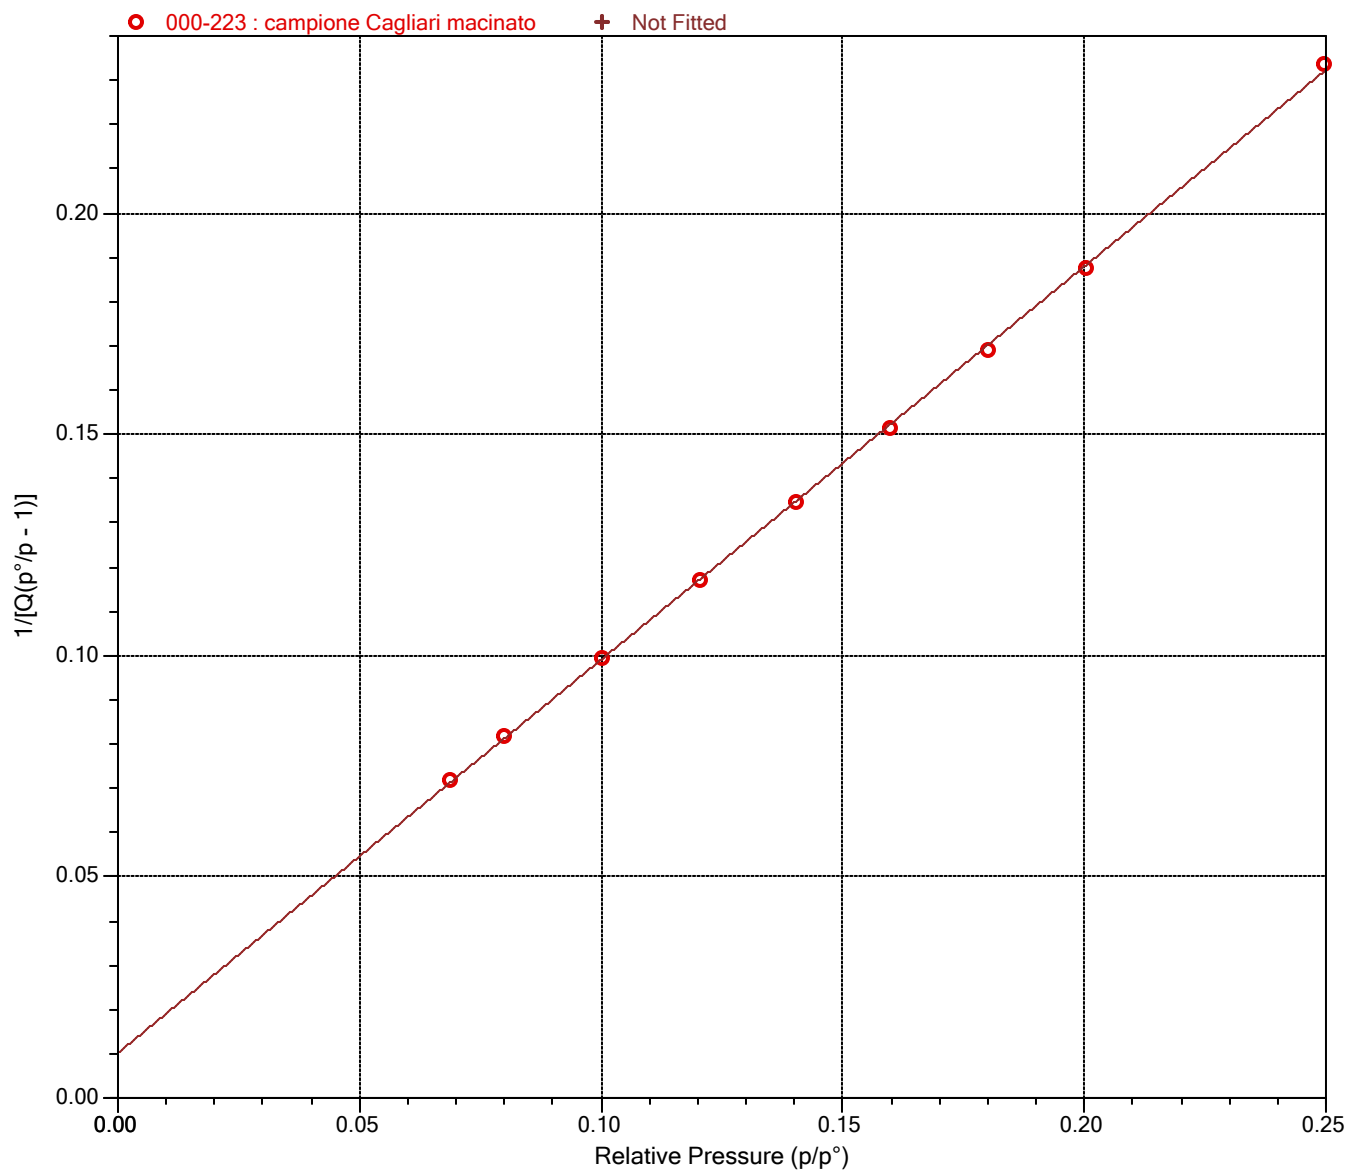

Sample: campione Cagliari macinato  
Operator:  
Submitter:  
File: C:\ASAP 2020 Plus\data\Chiappone\2022-1...\000-223.SMP

|                      |                         |                         |                                  |
|----------------------|-------------------------|-------------------------|----------------------------------|
| Started:             | 19/10/2022 11:35:41     | Analysis adsorptive:    | N2                               |
| Completed:           | 19/10/2022 16:31:25     | Analysis bath temp.:    | 77,188 K                         |
| Report time:         | 20/10/2022 18:25:04     | Thermal correction:     | No                               |
| Sample mass:         | 0,3526 g                | Ambient free space:     | 15,7578 cm <sup>3</sup> Measured |
| Analysis free space: | 45,2933 cm <sup>3</sup> | Equilibration interval: | 10 s                             |
| Low pressure dose:   | None                    | Sample density:         | 1,000 g/cm <sup>3</sup>          |
| Automatic degas:     | Yes                     |                         |                                  |

| Sample prep: Stage | Temperature (°C) | Ramp Rate (°C/min) | Time (min) |
|--------------------|------------------|--------------------|------------|
| 1                  | 30               | 10                 | 10         |

## Langmuir Report

Langmuir surface area: 44,3943 ± 21,4265 m<sup>2</sup>/g  
Slope: 0,098044 ± 0,047320 g/cm<sup>3</sup> STP  
Y-intercept: 95,913 ± 22,006 g/cm<sup>3</sup> STP·mmHg  
b: 0,001022 1/mmHg  
Qm: 10,1995 cm<sup>3</sup>/g STP  
Correlation coefficient: 0,353814  
Molecular cross-sectional area: 0,1620 nm<sup>2</sup>

| Pressure<br>(mmHg) | Quantity<br>Adsorbed (cm <sup>3</sup> /g<br>STP) | p/Q (g/cm <sup>3</sup><br>STP·mmHg) |
|--------------------|--------------------------------------------------|-------------------------------------|
| 8.555197           | 0.6789                                           | 12.601                              |
| 25.212904          | 0.8733                                           | 28.870                              |
| 51.249722          | 1.0232                                           | 50.086                              |
| 59.651485          | 1.0618                                           | 56.179                              |
| 74.653831          | 1.1201                                           | 66.649                              |
| 89.912277          | 1.1715                                           | 76.753                              |
| 104.813515         | 1.2151                                           | 86.256                              |
| 119.280426         | 1.2582                                           | 94.801                              |
| 134.200638         | 1.2963                                           | 103.523                             |
| 149.487457         | 1.3365                                           | 111.850                             |
| 186.282547         | 1.4231                                           | 130.903                             |
| 224.212997         | 1.5032                                           | 149.156                             |
| 261.594879         | 1.5874                                           | 164.793                             |
| 299.235931         | 1.6693                                           | 179.259                             |
| 336.567017         | 1.7547                                           | 191.812                             |
| 373.881531         | 1.8446                                           | 202.688                             |
| 411.206940         | 1.9417                                           | 211.782                             |
| 448.366119         | 2.0440                                           | 219.358                             |
| 485.951324         | 2.1607                                           | 224.908                             |
| 523.206482         | 2.2953                                           | 227.945                             |
| 560.521118         | 2.4638                                           | 227.498                             |
| 597.780090         | 2.6811                                           | 222.960                             |
| 612.285645         | 2.8020                                           | 218.517                             |
| 634.834595         | 3.0346                                           | 209.200                             |
| 653.130798         | 3.3207                                           | 196.687                             |
| 671.631470         | 3.7930                                           | 177.069                             |
| 689.895996         | 4.6745                                           | 147.586                             |
| 707.694458         | 6.4900                                           | 109.045                             |
| 724.288696         | 10.5363                                          | 68.742                              |
| 731.840942         | 14.2059                                          | 51.517                              |
| 737.964417         | 19.1602                                          | 38.515                              |
| 741.368286         | 24.3458                                          | 30.452                              |

Sample: campione Cagliari macinato

Operator:

Submitter:

File: C:\ASAP 2020 Plus\data\Chiappone\2022-1...\000-223.SMP

|                      |                         |                         |                                  |
|----------------------|-------------------------|-------------------------|----------------------------------|
| Started:             | 19/10/2022 11:35:41     | Analysis adsorptive:    | N2                               |
| Completed:           | 19/10/2022 16:31:25     | Analysis bath temp.:    | 77,188 K                         |
| Report time:         | 20/10/2022 18:25:04     | Thermal correction:     | No                               |
| Sample mass:         | 0,3526 g                | Ambient free space:     | 15,7578 cm <sup>3</sup> Measured |
| Analysis free space: | 45,2933 cm <sup>3</sup> | Equilibration interval: | 10 s                             |
| Low pressure dose:   | None                    | Sample density:         | 1,000 g/cm <sup>3</sup>          |
| Automatic degas:     | Yes                     |                         |                                  |

Sample prep: Stage  
1

Temperature (°C)  
30

Ramp Rate (°C/min)  
10

Time (min)  
10

Langmuir Surface Area Plot

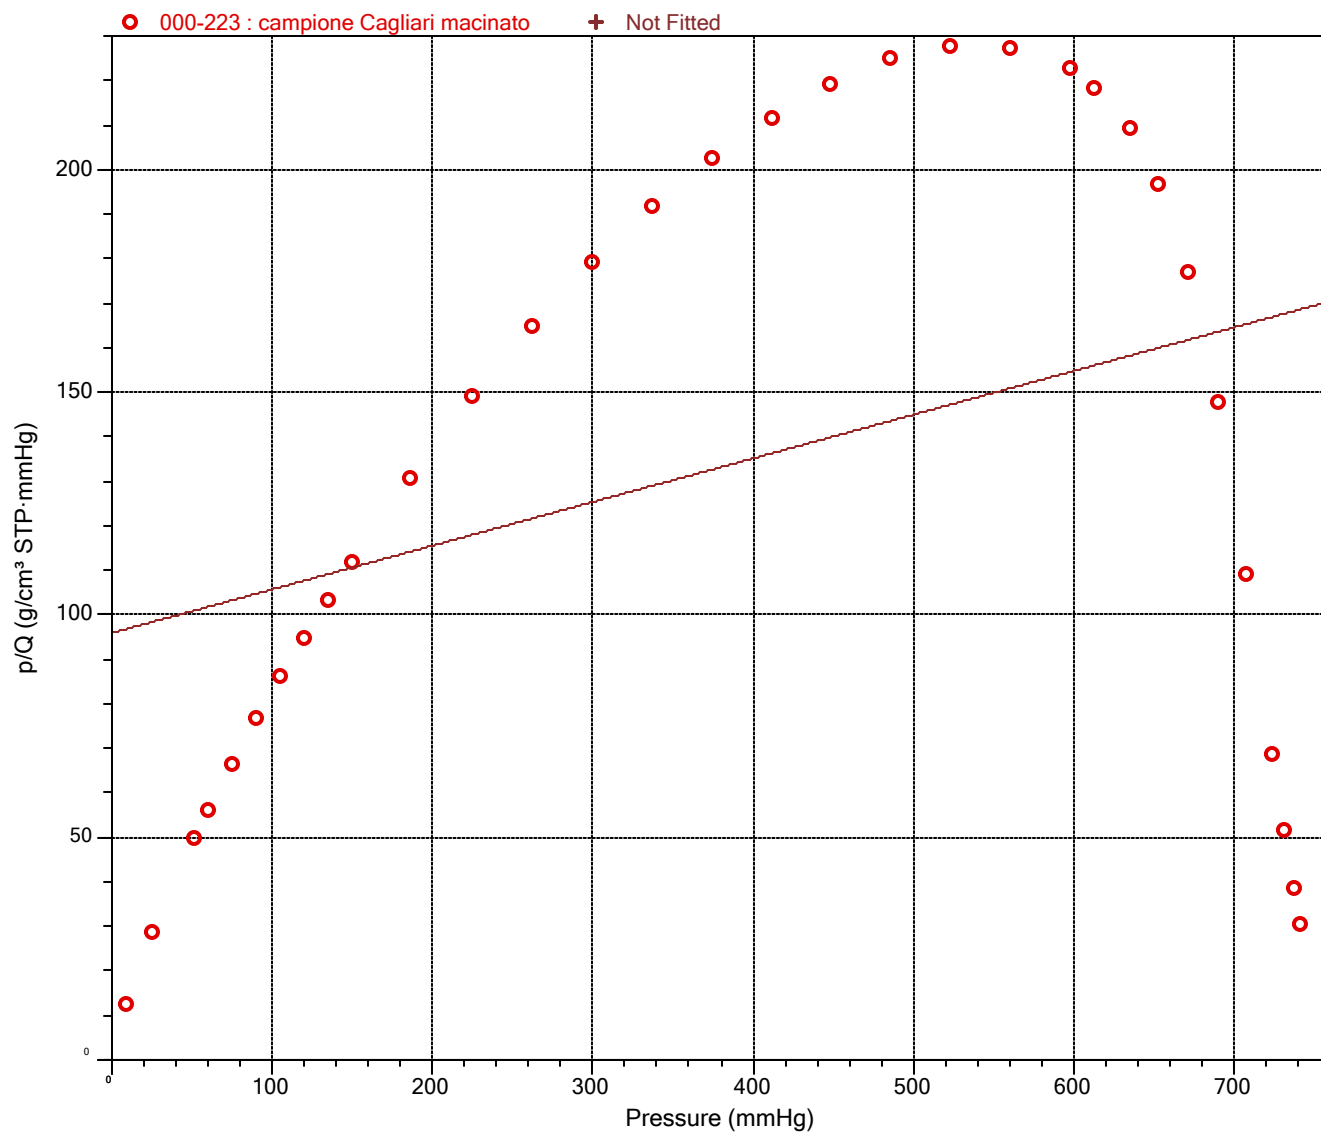

Sample: campione Cagliari macinato  
Operator:  
Submitter:  
File: C:\ASAP 2020 Plus\data\Chiappone\2022-1...\000-223.SMP

|                      |                         |                         |                                  |
|----------------------|-------------------------|-------------------------|----------------------------------|
| Started:             | 19/10/2022 11:35:41     | Analysis adsorptive:    | N2                               |
| Completed:           | 19/10/2022 16:31:25     | Analysis bath temp.:    | 77,188 K                         |
| Report time:         | 20/10/2022 18:25:04     | Thermal correction:     | No                               |
| Sample mass:         | 0,3526 g                | Ambient free space:     | 15,7578 cm <sup>3</sup> Measured |
| Analysis free space: | 45,2933 cm <sup>3</sup> | Equilibration interval: | 10 s                             |
| Low pressure dose:   | None                    | Sample density:         | 1,000 g/cm <sup>3</sup>          |
| Automatic degas:     | Yes                     |                         |                                  |

| Sample prep: Stage | Temperature (°C) | Ramp Rate (°C/min) | Time (min) |
|--------------------|------------------|--------------------|------------|
| 1                  | 30               | 10                 | 10         |

## t-Plot Report

Micropore volume: -0,000020 cm<sup>3</sup>/g  
 Micropore area:  
 External surface area: 4,7682 m<sup>2</sup>/g  
 Slope: 3,082619 ± 0,062266 cm<sup>3</sup>/g·nm STP  
 Y-intercept: -0,013200 ± 0,025317 cm<sup>3</sup>/g STP  
 Correlation coefficient: 0,998778  
 Surface area correction factor: 1,000  
 Density conversion factor: 0,0015468  
 Total surface area (BET): 4,8426 m<sup>2</sup>/g  
 Thickness range: 0,35000 to 0,50000 nm  
 Thickness equation: Harkins and Jura

## Thickness Curve

$$t = [ 13.99 / ( 0.034 - \log(p/p^{\circ}) ) ] ^{0.5}$$

## t-Plot Report - Data

| Relative Pressure (p/p°) | Statistical Thickness (nm) | Quantity Adsorbed (cm <sup>3</sup> /g STP) | Fitted |
|--------------------------|----------------------------|--------------------------------------------|--------|
| 0.068677282              | 0.34184                    | 1.0232                                     |        |
| 0.079940468              | 0.35167                    | 1.0618                                     |        |
| 0.100049911              | 0.36787                    | 1.1201                                     |        |
| 0.120504693              | 0.38315                    | 1.1715                                     |        |
| 0.140480737              | 0.39728                    | 1.2151                                     |        |
| 0.159878107              | 0.41050                    | 1.2582                                     |        |
| 0.179888289              | 0.42378                    | 1.2963                                     |        |
| 0.200381282              | 0.43713                    | 1.3365                                     |        |
| 0.249708467              | 0.46880                    | 1.4231                                     |        |
| 0.300568445              | 0.50159                    | 1.5032                                     |        |
| 0.350704638              | 0.53485                    | 1.5874                                     |        |
| 0.401172050              | 0.56995                    | 1.6693                                     |        |
| 0.451228599              | 0.60708                    | 1.7547                                     |        |
| 0.501302383              | 0.64729                    | 1.8446                                     |        |
| 0.551384683              | 0.69153                    | 1.9417                                     |        |
| 0.601216792              | 0.74074                    | 2.0440                                     |        |
| 0.651562704              | 0.79736                    | 2.1607                                     |        |

\* The micropore area is not reported because either the micropore volume is negative or the calculated external surface area is larger than the total surface area.

Sample: campione Cagliari macinato

Operator:

Submitter:

File: C:\ASAP 2020 Plus\data\Chiappone\2022-1...\000-223.SMP

|                      |                         |                         |                                  |
|----------------------|-------------------------|-------------------------|----------------------------------|
| Started:             | 19/10/2022 11:35:41     | Analysis adsorptive:    | N2                               |
| Completed:           | 19/10/2022 16:31:25     | Analysis bath temp.:    | 77,188 K                         |
| Report time:         | 20/10/2022 18:25:04     | Thermal correction:     | No                               |
| Sample mass:         | 0,3526 g                | Ambient free space:     | 15,7578 cm <sup>3</sup> Measured |
| Analysis free space: | 45,2933 cm <sup>3</sup> | Equilibration interval: | 10 s                             |
| Low pressure dose:   | None                    | Sample density:         | 1,000 g/cm <sup>3</sup>          |
| Automatic degas:     | Yes                     |                         |                                  |

Sample prep: Stage  
1

Temperature (°C)  
30

Ramp Rate (°C/min)  
10

Time (min)  
10

t-Plot

Harkins and Jura

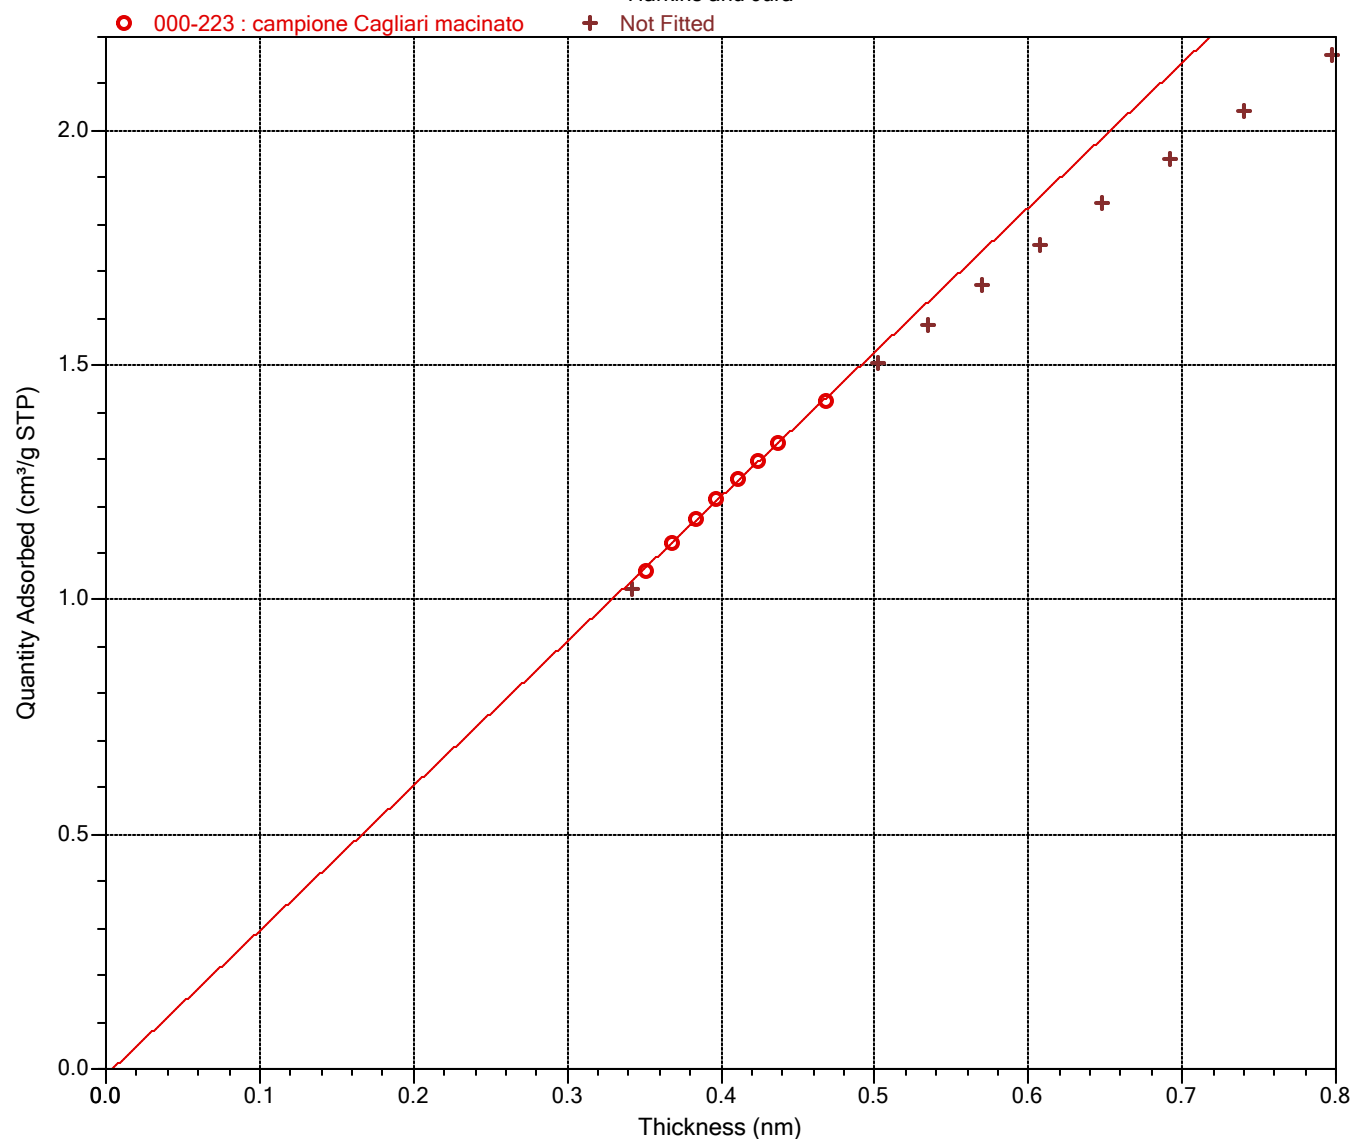

Sample: campione Cagliari macinato

Operator:

Submitter:

File: C:\ASAP 2020 Plus\data\Chiappone\2022-1...\000-223.SMP

|                      |                         |                         |                                  |
|----------------------|-------------------------|-------------------------|----------------------------------|
| Started:             | 19/10/2022 11:35:41     | Analysis adsorptive:    | N2                               |
| Completed:           | 19/10/2022 16:31:25     | Analysis bath temp.:    | 77,188 K                         |
| Report time:         | 20/10/2022 18:25:04     | Thermal correction:     | No                               |
| Sample mass:         | 0,3526 g                | Ambient free space:     | 15,7578 cm <sup>3</sup> Measured |
| Analysis free space: | 45,2933 cm <sup>3</sup> | Equilibration interval: | 10 s                             |
| Low pressure dose:   | None                    | Sample density:         | 1,000 g/cm <sup>3</sup>          |
| Automatic degas:     | Yes                     |                         |                                  |

| Sample prep: Stage | Temperature (°C) | Ramp Rate (°C/min) | Time (min) |
|--------------------|------------------|--------------------|------------|
| 1                  | 30               | 10                 | 10         |

# BJH Adsorption Pore Distribution Report

Faas Correction

Harkins and Jura

$$t = [ 13.99 / ( 0.034 - \log(p/p^{\circ}) ) ] ^{0.5}$$

Width range: 1,7000 to 300,0000 nm

Adsorbate property factor: 0,95300 nm

Density conversion factor: 0,0015468

Fraction of pores open at both ends: 0,00

| Pore Width<br>Range (nm) | Average Width<br>(nm) | Incremental<br>Pore Volume<br>(cm <sup>3</sup> /g) | Cumulative Pore<br>Volume (cm <sup>3</sup> /g) | Incremental<br>Pore Area (m <sup>2</sup> /g) | Cumulative Pore<br>Area (m <sup>2</sup> /g) |
|--------------------------|-----------------------|----------------------------------------------------|------------------------------------------------|----------------------------------------------|---------------------------------------------|
| 364.5 - 195.0            | 232.2                 | 0.008292                                           | 0.008292                                       | 0.143                                        | 0.143                                       |
| 195.0 - 107.2            | 127.1                 | 0.008111                                           | 0.016402                                       | 0.255                                        | 0.398                                       |
| 107.2 - 69.4             | 80.3                  | 0.006161                                           | 0.022563                                       | 0.307                                        | 0.705                                       |
| 69.4 - 39.7              | 46.7                  | 0.007068                                           | 0.029631                                       | 0.606                                        | 1.311                                       |
| 39.7 - 27.4              | 31.3                  | 0.003202                                           | 0.032833                                       | 0.410                                        | 1.720                                       |
| 27.4 - 20.9              | 23.2                  | 0.001510                                           | 0.034343                                       | 0.260                                        | 1.980                                       |
| 20.9 - 16.9              | 18.4                  | 0.000748                                           | 0.035091                                       | 0.162                                        | 2.143                                       |
| 16.9 - 14.2              | 15.3                  | 0.000402                                           | 0.035493                                       | 0.105                                        | 2.248                                       |
| 14.2 - 11.8              | 12.8                  | 0.000280                                           | 0.035773                                       | 0.088                                        | 2.336                                       |
| 11.8 - 10.7              | 11.2                  | 0.000135                                           | 0.035908                                       | 0.048                                        | 2.384                                       |
| 10.7 - 8.6               | 9.4                   | 0.000188                                           | 0.036096                                       | 0.080                                        | 2.465                                       |
| 8.6 - 7.1                | 7.7                   | 0.000132                                           | 0.036228                                       | 0.069                                        | 2.533                                       |
| 7.1 - 6.0                | 6.5                   | 0.000091                                           | 0.036319                                       | 0.056                                        | 2.590                                       |
| 6.0 - 5.2                | 5.6                   | 0.000078                                           | 0.036398                                       | 0.056                                        | 2.646                                       |
| 5.2 - 4.6                | 4.9                   | 0.000070                                           | 0.036467                                       | 0.057                                        | 2.703                                       |
| 4.6 - 4.1                | 4.3                   | 0.000077                                           | 0.036545                                       | 0.072                                        | 2.775                                       |
| 4.1 - 3.6                | 3.8                   | 0.000074                                           | 0.036619                                       | 0.078                                        | 2.853                                       |
| 3.6 - 3.2                | 3.4                   | 0.000075                                           | 0.036693                                       | 0.088                                        | 2.942                                       |
| 3.2 - 2.9                | 3.0                   | 0.000073                                           | 0.036766                                       | 0.096                                        | 3.037                                       |
| 2.9 - 2.6                | 2.7                   | 0.000092                                           | 0.036858                                       | 0.135                                        | 3.172                                       |
| 2.6 - 2.3                | 2.4                   | 0.000075                                           | 0.036933                                       | 0.124                                        | 3.296                                       |
| 2.3 - 2.1                | 2.2                   | 0.000108                                           | 0.037041                                       | 0.200                                        | 3.496                                       |
| 2.1 - 2.0                | 2.0                   | 0.000060                                           | 0.037102                                       | 0.120                                        | 3.616                                       |
| 2.0 - 1.9                | 1.9                   | 0.000050                                           | 0.037151                                       | 0.104                                        | 3.720                                       |
| 1.9 - 1.8                | 1.8                   | 0.000073                                           | 0.037224                                       | 0.162                                        | 3.882                                       |
| 1.8 - 1.7                | 1.7                   | 0.000064                                           | 0.037288                                       | 0.149                                        | 4.030                                       |

Sample: campione Cagliari macinato

Operator:

Submitter:

File: C:\ASAP 2020 Plus\data\Chiappone\2022-1...\000-223.SMP

|                      |                         |                         |                                  |
|----------------------|-------------------------|-------------------------|----------------------------------|
| Started:             | 19/10/2022 11:35:41     | Analysis adsorptive:    | N2                               |
| Completed:           | 19/10/2022 16:31:25     | Analysis bath temp.:    | 77,188 K                         |
| Report time:         | 20/10/2022 18:25:04     | Thermal correction:     | No                               |
| Sample mass:         | 0,3526 g                | Ambient free space:     | 15,7578 cm <sup>3</sup> Measured |
| Analysis free space: | 45,2933 cm <sup>3</sup> | Equilibration interval: | 10 s                             |
| Low pressure dose:   | None                    | Sample density:         | 1,000 g/cm <sup>3</sup>          |
| Automatic degas:     | Yes                     |                         |                                  |

Sample prep: Stage  
1

Temperature (°C)  
30

Ramp Rate (°C/min)  
10

Time (min)  
10

### BJH Adsorption Cumulative Pore Volume (Larger)

Harkins and Jura : Faas Correction

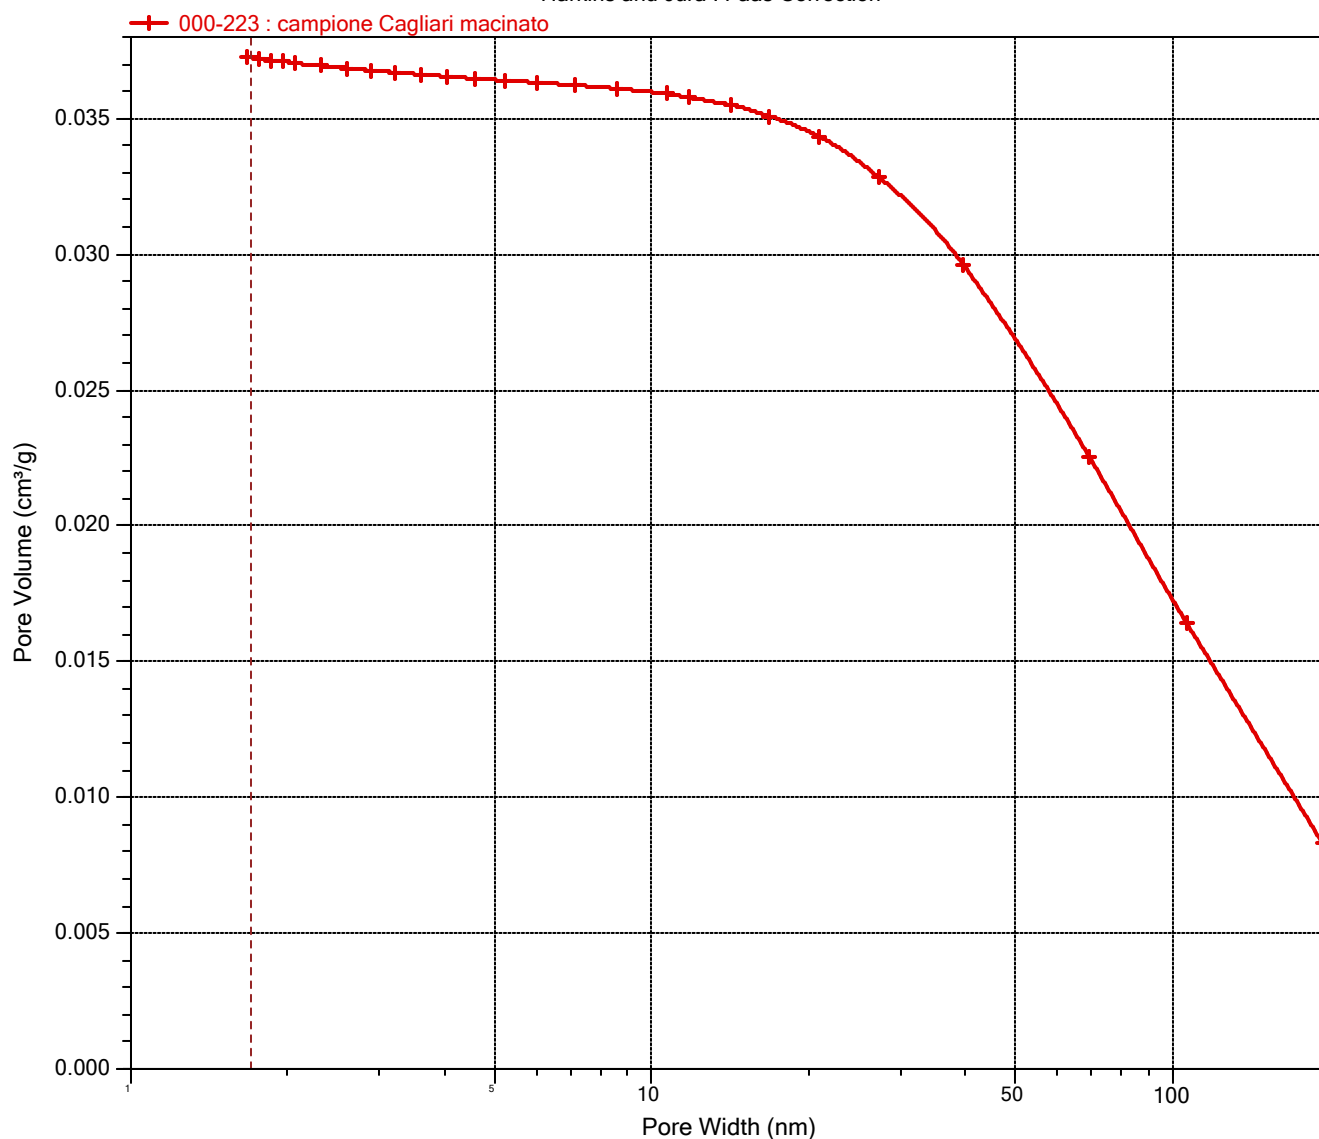

Sample: campione Cagliari macinato

Operator:

Submitter:

File: C:\ASAP 2020 Plus\data\Chiappone\2022-1...\000-223.SMP

|                      |                         |                         |                                  |
|----------------------|-------------------------|-------------------------|----------------------------------|
| Started:             | 19/10/2022 11:35:41     | Analysis adsorptive:    | N2                               |
| Completed:           | 19/10/2022 16:31:25     | Analysis bath temp.:    | 77,188 K                         |
| Report time:         | 20/10/2022 18:25:04     | Thermal correction:     | No                               |
| Sample mass:         | 0,3526 g                | Ambient free space:     | 15,7578 cm <sup>3</sup> Measured |
| Analysis free space: | 45,2933 cm <sup>3</sup> | Equilibration interval: | 10 s                             |
| Low pressure dose:   | None                    | Sample density:         | 1,000 g/cm <sup>3</sup>          |
| Automatic degas:     | Yes                     |                         |                                  |

Sample prep: Stage  
1

Temperature (°C)  
30

Ramp Rate (°C/min)  
10

Time (min)  
10

### BJH Adsorption dV/dw Pore Volume

Harkins and Jura : Faas Correction

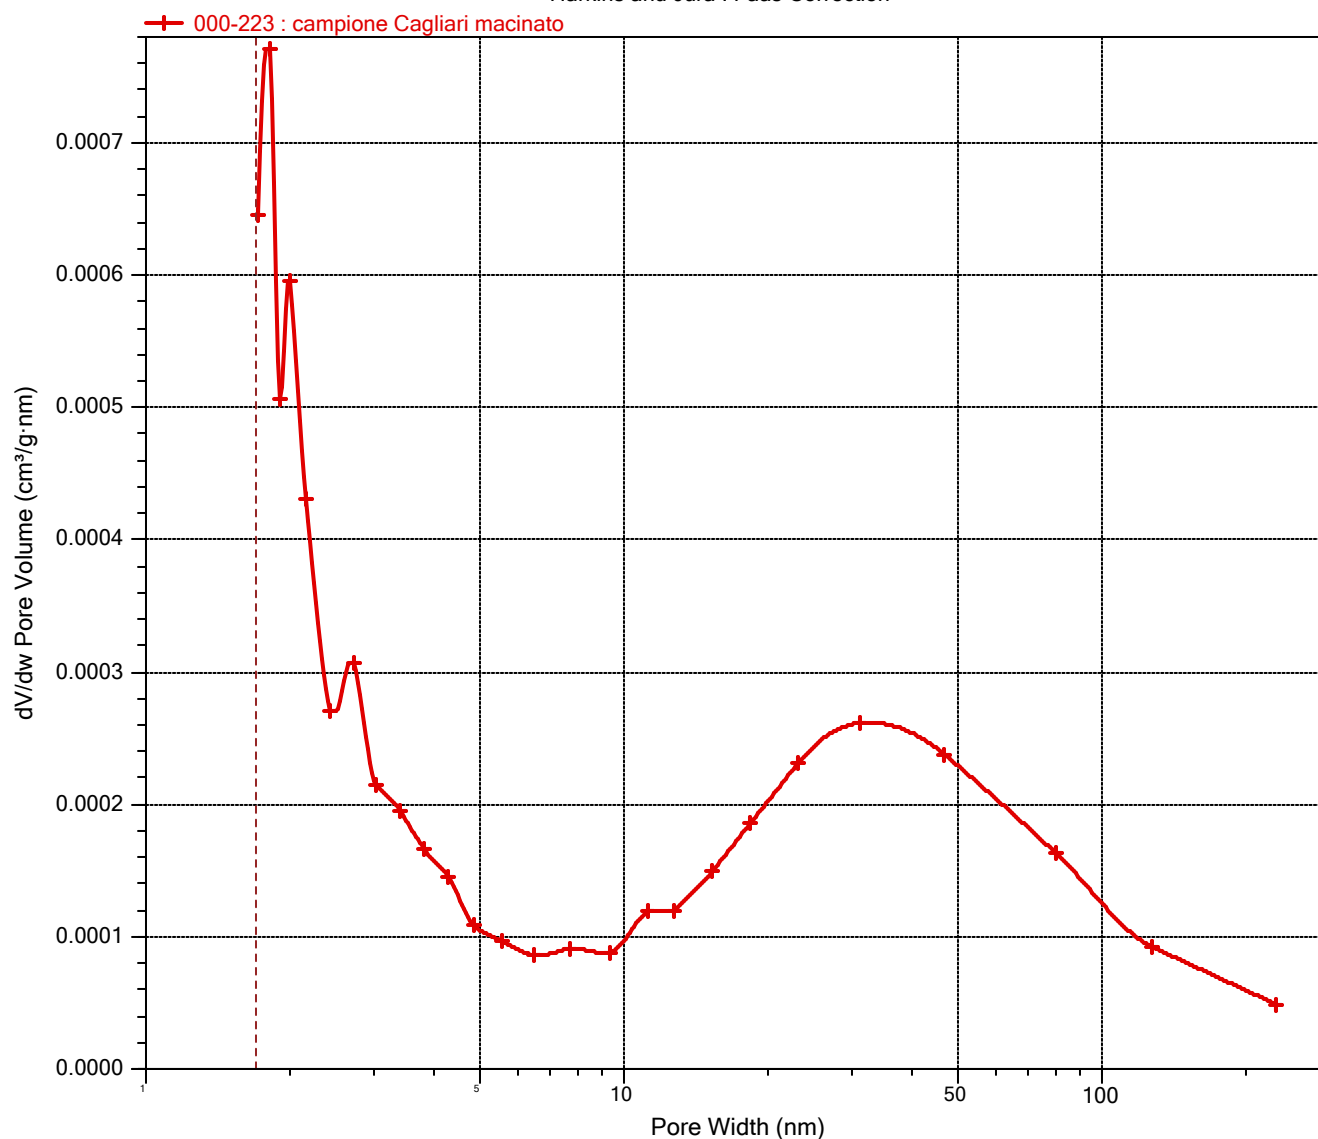



Sample: campione Cagliari macinato

Operator:

Submitter:

File: C:\ASAP 2020 Plus\data\Chiappone\2022-1...\000-223.SMP

|                      |                         |                         |                                  |
|----------------------|-------------------------|-------------------------|----------------------------------|
| Started:             | 19/10/2022 11:35:41     | Analysis adsorptive:    | N2                               |
| Completed:           | 19/10/2022 16:31:25     | Analysis bath temp.:    | 77,188 K                         |
| Report time:         | 20/10/2022 18:25:04     | Thermal correction:     | No                               |
| Sample mass:         | 0,3526 g                | Ambient free space:     | 15,7578 cm <sup>3</sup> Measured |
| Analysis free space: | 45,2933 cm <sup>3</sup> | Equilibration interval: | 10 s                             |
| Low pressure dose:   | None                    | Sample density:         | 1,000 g/cm <sup>3</sup>          |
| Automatic degas:     | Yes                     |                         |                                  |

|                    |                  |                    |            |
|--------------------|------------------|--------------------|------------|
| Sample prep: Stage | Temperature (°C) | Ramp Rate (°C/min) | Time (min) |
| 1                  | 30               | 10                 | 10         |

## BJH Desorption Pore Distribution Report

Faas Correction

Harkins and Jura

$$t = [ 13.99 / ( 0.034 - \log(p/p^0) ) ] ^{0.5}$$

Width range: 1,7000 to 300,0000 nm  
 Adsorbate property factor: 0,95300 nm  
 Density conversion factor: 0,0015468  
 Fraction of pores open at both ends: 0,00

| Pore Width<br>Range (nm) | Average Width<br>(nm) | Incremental<br>Pore Volume<br>(cm <sup>3</sup> /g) | Cumulative Pore<br>Volume (cm <sup>3</sup> /g) | Incremental<br>Pore Area (m <sup>2</sup> /g) | Cumulative Pore<br>Area (m <sup>2</sup> /g) |
|--------------------------|-----------------------|----------------------------------------------------|------------------------------------------------|----------------------------------------------|---------------------------------------------|
| 364.4 - 137.6            | 165.1                 | 0.006052                                           | 0.006052                                       | 0.147                                        | 0.147                                       |
| 137.6 - 85.7             | 99.9                  | 0.006721                                           | 0.012773                                       | 0.269                                        | 0.416                                       |
| 85.7 - 62.4              | 70.3                  | 0.005201                                           | 0.017974                                       | 0.296                                        | 0.712                                       |
| 62.4 - 39.3              | 45.7                  | 0.007097                                           | 0.025071                                       | 0.622                                        | 1.333                                       |
| 39.3 - 28.4              | 32.0                  | 0.004546                                           | 0.029617                                       | 0.568                                        | 1.901                                       |
| 28.4 - 21.2              | 23.7                  | 0.003208                                           | 0.032825                                       | 0.542                                        | 2.443                                       |
| 21.2 - 16.9              | 18.6                  | 0.001799                                           | 0.034625                                       | 0.388                                        | 2.831                                       |
| 16.9 - 14.1              | 15.2                  | 0.001016                                           | 0.035640                                       | 0.266                                        | 3.097                                       |
| 14.1 - 12.1              | 12.9                  | 0.000556                                           | 0.036196                                       | 0.172                                        | 3.269                                       |
| 12.1 - 10.6              | 11.2                  | 0.000305                                           | 0.036501                                       | 0.109                                        | 3.378                                       |
| 10.6 - 8.5               | 9.3                   | 0.000247                                           | 0.036748                                       | 0.107                                        | 3.484                                       |
| 8.5 - 7.0                | 7.6                   | 0.000075                                           | 0.036823                                       | 0.040                                        | 3.524                                       |
| 7.0 - 6.0                | 6.4                   | 0.000024                                           | 0.036847                                       | 0.015                                        | 3.539                                       |
| 6.0 - 5.2                | 5.5                   | 0.000003                                           | 0.036849                                       | 0.002                                        | 3.541                                       |
| 5.2 - 4.0                | 4.3                   | 0.000005                                           | 0.036854                                       | 0.005                                        | 3.545                                       |
| 4.0 - 3.6                | 3.8                   | 0.000012                                           | 0.036866                                       | 0.012                                        | 3.558                                       |
| 3.6 - 3.2                | 3.4                   | 0.000009                                           | 0.036875                                       | 0.011                                        | 3.568                                       |
| 3.2 - 2.9                | 3.0                   | 0.000027                                           | 0.036902                                       | 0.036                                        | 3.604                                       |
| 2.9 - 2.6                | 2.7                   | 0.000022                                           | 0.036924                                       | 0.032                                        | 3.636                                       |
| 2.6 - 2.3                | 2.4                   | 0.000038                                           | 0.036961                                       | 0.062                                        | 3.698                                       |
| 2.3 - 2.1                | 2.2                   | 0.000066                                           | 0.037027                                       | 0.122                                        | 3.820                                       |
| 2.1 - 1.8                | 1.9                   | 0.000073                                           | 0.037100                                       | 0.156                                        | 3.975                                       |

Sample: campione Cagliari macinato

Operator:

Submitter:

File: C:\ASAP 2020 Plus\data\Chiappone\2022-1...\000-223.SMP

|                      |                         |                         |                                  |
|----------------------|-------------------------|-------------------------|----------------------------------|
| Started:             | 19/10/2022 11:35:41     | Analysis adsorptive:    | N2                               |
| Completed:           | 19/10/2022 16:31:25     | Analysis bath temp.:    | 77,188 K                         |
| Report time:         | 20/10/2022 18:25:04     | Thermal correction:     | No                               |
| Sample mass:         | 0,3526 g                | Ambient free space:     | 15,7578 cm <sup>3</sup> Measured |
| Analysis free space: | 45,2933 cm <sup>3</sup> | Equilibration interval: | 10 s                             |
| Low pressure dose:   | None                    | Sample density:         | 1,000 g/cm <sup>3</sup>          |
| Automatic degas:     | Yes                     |                         |                                  |

Sample prep: Stage  
1

Temperature (°C)  
30

Ramp Rate (°C/min)  
10

Time (min)  
10

### BJH Desorption Cumulative Pore Volume (Larger)

Harkins and Jura : Faas Correction

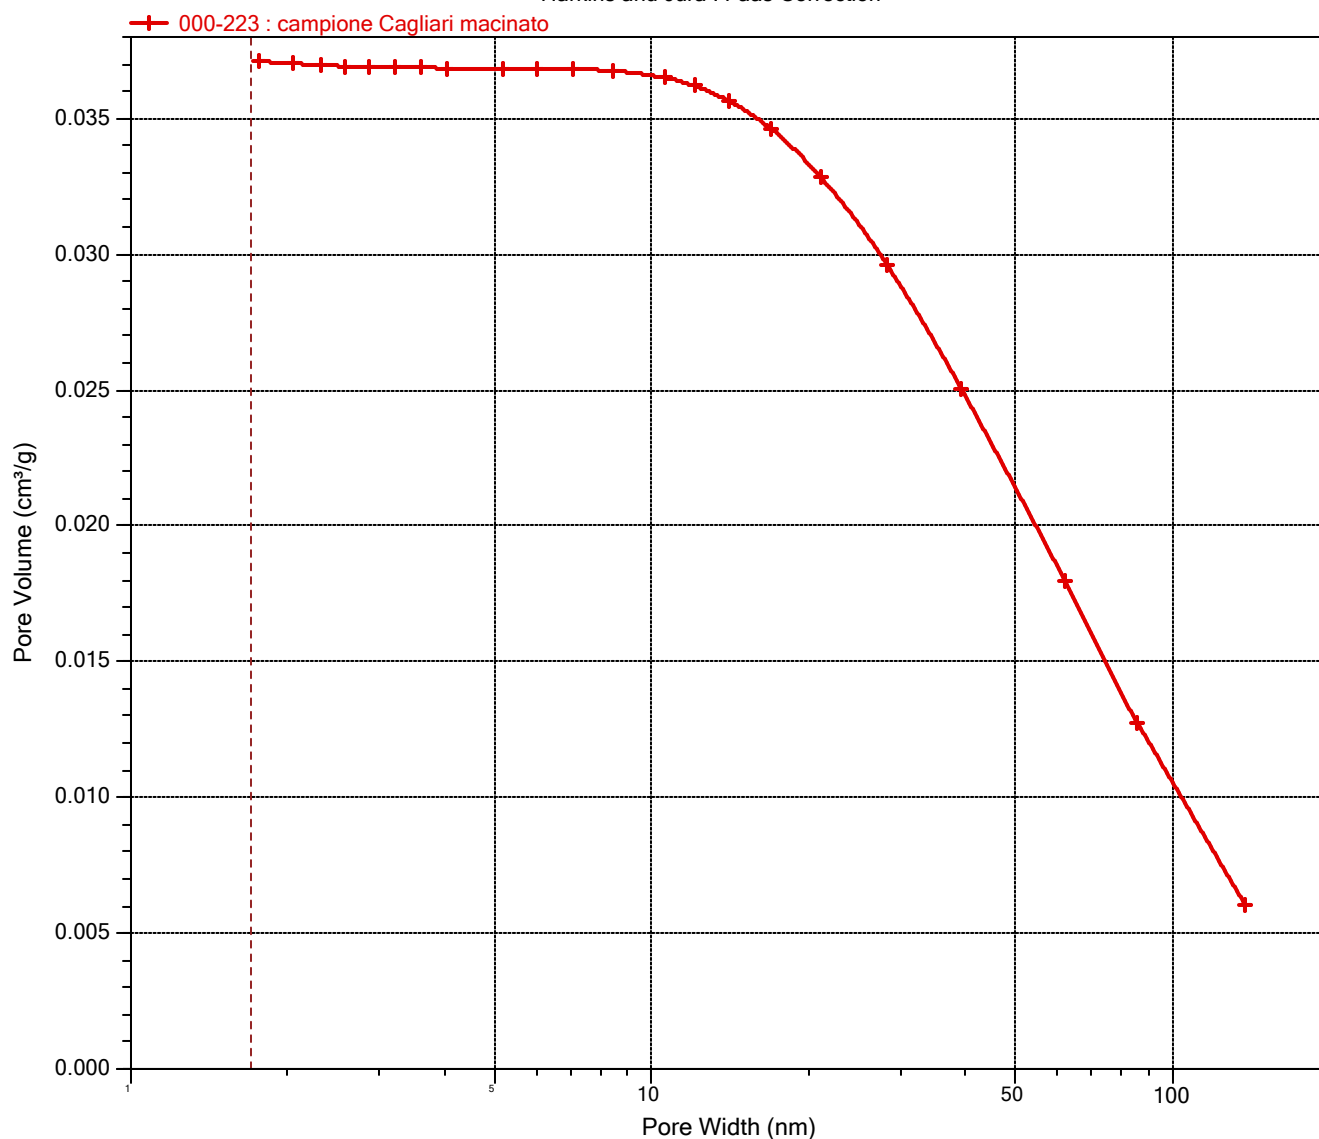

Sample: campione Cagliari macinato

Operator:

Submitter:

File: C:\ASAP 2020 Plus\data\Chiappone\2022-1...\000-223.SMP

|                      |                         |                         |                                  |
|----------------------|-------------------------|-------------------------|----------------------------------|
| Started:             | 19/10/2022 11:35:41     | Analysis adsorptive:    | N2                               |
| Completed:           | 19/10/2022 16:31:25     | Analysis bath temp.:    | 77,188 K                         |
| Report time:         | 20/10/2022 18:25:04     | Thermal correction:     | No                               |
| Sample mass:         | 0,3526 g                | Ambient free space:     | 15,7578 cm <sup>3</sup> Measured |
| Analysis free space: | 45,2933 cm <sup>3</sup> | Equilibration interval: | 10 s                             |
| Low pressure dose:   | None                    | Sample density:         | 1,000 g/cm <sup>3</sup>          |
| Automatic degas:     | Yes                     |                         |                                  |

Sample prep: Stage  
1

Temperature (°C)  
30

Ramp Rate (°C/min)  
10

Time (min)  
10

### BJH Desorption dV/dw Pore Volume

Harkins and Jura : Faas Correction

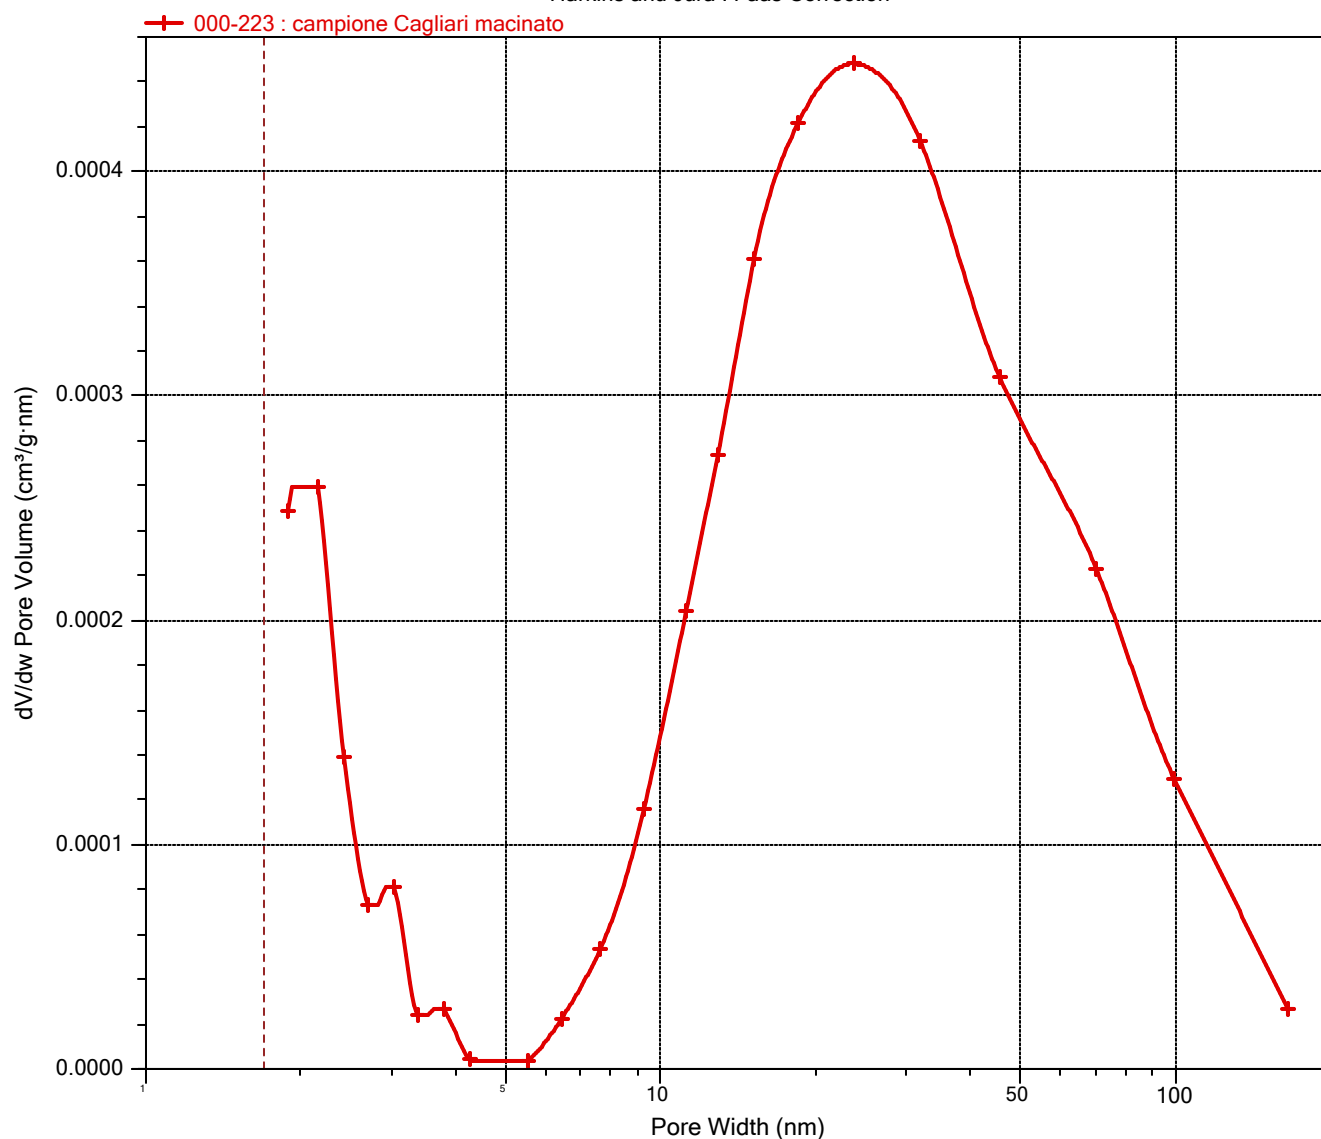

Sample: campione Cagliari macinato

Operator:

Submitter:

File: C:\ASAP 2020 Plus\data\Chiappone\2022-1...\000-223.SMP

|                      |                         |                         |                                  |
|----------------------|-------------------------|-------------------------|----------------------------------|
| Started:             | 19/10/2022 11:35:41     | Analysis adsorptive:    | N2                               |
| Completed:           | 19/10/2022 16:31:25     | Analysis bath temp.:    | 77,188 K                         |
| Report time:         | 20/10/2022 18:25:04     | Thermal correction:     | No                               |
| Sample mass:         | 0,3526 g                | Ambient free space:     | 15,7578 cm <sup>3</sup> Measured |
| Analysis free space: | 45,2933 cm <sup>3</sup> | Equilibration interval: | 10 s                             |
| Low pressure dose:   | None                    | Sample density:         | 1,000 g/cm <sup>3</sup>          |
| Automatic degas:     | Yes                     |                         |                                  |

| Sample prep: Stage | Temperature (°C) | Ramp Rate (°C/min) | Time (min) |
|--------------------|------------------|--------------------|------------|
| 1                  | 30               | 10                 | 10         |

## DFT Pore Size Reports

Primary Data

4070- Unable to load deconvolution model Invalid.

Sample: campione Cagliari macinato

Operator:

Submitter:

File: C:\ASAP 2020 Plus\data\Chiappone\2022-1...\000-223.SMP

|                      |                         |                         |                                  |
|----------------------|-------------------------|-------------------------|----------------------------------|
| Started:             | 19/10/2022 11:35:41     | Analysis adsorptive:    | N2                               |
| Completed:           | 19/10/2022 16:31:25     | Analysis bath temp.:    | 77,188 K                         |
| Report time:         | 20/10/2022 18:25:04     | Thermal correction:     | No                               |
| Sample mass:         | 0,3526 g                | Ambient free space:     | 15,7578 cm <sup>3</sup> Measured |
| Analysis free space: | 45,2933 cm <sup>3</sup> | Equilibration interval: | 10 s                             |
| Low pressure dose:   | None                    | Sample density:         | 1,000 g/cm <sup>3</sup>          |
| Automatic degas:     | Yes                     |                         |                                  |

| Sample prep: Stage | Temperature (°C) | Ramp Rate (°C/min) | Time (min) |
|--------------------|------------------|--------------------|------------|
| 1                  | 30               | 10                 | 10         |

## DFT Surface Energy Reports

Primary Data

4070- Unable to load deconvolution model Invalid.

Sample: resine Cagliari pre-macinazione  
Operator:  
Submitter:  
File: C:\ASAP 2020 Plus\data\Chiappone\2022-1...\000-225.SMP

|                      |                         |                         |                                  |
|----------------------|-------------------------|-------------------------|----------------------------------|
| Started:             | 24/10/2022 09:45:14     | Analysis adsorptive:    | N2                               |
| Completed:           | 24/10/2022 18:12:00     | Analysis bath temp.:    | 77,159 K                         |
| Report time:         | 24/10/2022 20:01:54     | Thermal correction:     | No                               |
| Sample mass:         | 0,4650 g                | Ambient free space:     | 27,2106 cm <sup>3</sup> Measured |
| Analysis free space: | 81,8113 cm <sup>3</sup> | Equilibration interval: | 10 s                             |
| Low pressure dose:   | None                    | Sample density:         | 1,000 g/cm <sup>3</sup>          |
| Automatic degas:     | Yes                     |                         |                                  |

| Sample prep: Stage | Temperature (°C) | Ramp Rate (°C/min) | Time (min) |
|--------------------|------------------|--------------------|------------|
| 1                  | 30               | 10                 | 10         |

### Summary Report

#### Surface Area

|                                                                                             |                            |
|---------------------------------------------------------------------------------------------|----------------------------|
| Single point surface area at $p/p^\circ = 0,249877845$ :                                    | 27,5781 m <sup>2</sup> /g  |
| BET Surface Area:                                                                           | 28,6015 m <sup>2</sup> /g  |
| Langmuir Surface Area:                                                                      | 535,7181 m <sup>2</sup> /g |
| t-Plot Micropore Area:                                                                      | 1,2312 m <sup>2</sup> /g   |
| t-Plot external surface area:                                                               | 27,3703 m <sup>2</sup> /g  |
| BJH Adsorption cumulative surface area of pores<br>between 1,7000 nm and 300,0000 nm width: | 24,8568 m <sup>2</sup> /g  |
| BJH Desorption cumulative surface area of pores<br>between 1,7000 nm and 300,0000 nm width: | 30,6124 m <sup>2</sup> /g  |
| D-H Adsorption cumulative surface area of pores<br>between 1,7000 nm and 300,0000 nm width: | 24,5523 m <sup>2</sup> /g  |
| D-H Desorption cumulative surface area of pores<br>between 1,7000 nm and 300,0000 nm width: | 29,8710 m <sup>2</sup> /g  |

#### Pore Volume

|                                                                                                                 |                             |
|-----------------------------------------------------------------------------------------------------------------|-----------------------------|
| Single point adsorption total pore volume of pores<br>less than 40,3122 nm width at $p/p^\circ = 0,950000000$ : | 0,078042 cm <sup>3</sup> /g |
| Single point desorption total pore volume of pores<br>less than 40,3122 nm width at $p/p^\circ = 0,950000000$ : | 0,184959 cm <sup>3</sup> /g |
| t-Plot micropore volume:                                                                                        | 0,000298 cm <sup>3</sup> /g |
| BJH Adsorption cumulative volume of pores<br>between 1,7000 nm and 300,0000 nm width:                           | 0,215483 cm <sup>3</sup> /g |
| BJH Desorption cumulative volume of pores<br>between 1,7000 nm and 300,0000 nm width:                           | 0,217399 cm <sup>3</sup> /g |
| D-H Adsorption cumulative volume of pores<br>between 1,7000 nm and 300,0000 nm width:                           | 0,214571 cm <sup>3</sup> /g |
| D-H Desorption cumulative volume of pores                                                                       |                             |

Sample: resine Cagliari pre-macinazione  
Operator:  
Submitter:  
File: C:\ASAP 2020 Plus\data\Chiappone\2022-1...\000-225.SMP

|                      |                         |                         |                                  |
|----------------------|-------------------------|-------------------------|----------------------------------|
| Started:             | 24/10/2022 09:45:14     | Analysis adsorptive:    | N2                               |
| Completed:           | 24/10/2022 18:12:00     | Analysis bath temp.:    | 77,159 K                         |
| Report time:         | 24/10/2022 20:01:54     | Thermal correction:     | No                               |
| Sample mass:         | 0,4650 g                | Ambient free space:     | 27,2106 cm <sup>3</sup> Measured |
| Analysis free space: | 81,8113 cm <sup>3</sup> | Equilibration interval: | 10 s                             |
| Low pressure dose:   | None                    | Sample density:         | 1,000 g/cm <sup>3</sup>          |
| Automatic degas:     | Yes                     |                         |                                  |

| Sample prep: Stage | Temperature (°C) | Ramp Rate (°C/min) | Time (min) |
|--------------------|------------------|--------------------|------------|
| 1                  | 30               | 10                 | 10         |

#### Pore Volume

between 1,7000 nm and 300,0000 nm width: 0,219121 cm<sup>3</sup>/g

#### Pore Size

Adsorption average pore diameter (4V/A by BET): 10,9144 nm

Desorption average pore diameter (4V/A by BET): 25,8671 nm

BJH Adsorption average pore width (4V/A): 34,6760 nm

BJH Desorption average pore width (4V/A): 28,4066 nm

D-H Adsorption average pore width (4V/A): 34,9574 nm

D-H Desorption average pore width (4V/A): 29,3423 nm

#### Freundlich

Qm·C: 0,3865 ± 0,0996 cm<sup>3</sup>/g STP

m: 1,4920 ± 0,2311

#### Temkin

q·alpha/Qm: 0,036607 ± 0,010925 kJ/mol·(cm<sup>3</sup>/g STP)

A: 0,0203 ± 0,0419 mmHg

#### Nanoparticle Size:

Average Particle Size 209,7791 nm

#### Horvath-Kawazoe

Maximum pore volume at p/p° = 0,179942753: 0,011928 cm<sup>3</sup>/g

Median pore width: 0,7761 nm

#### MP-Method

Cumulative surface area of pores between  
1,89666 nm and 1,89666 nm hydraulic radius: 0,0000 m<sup>2</sup>/g

Cumulative pore volume of pores between

Sample: resine Cagliari pre-macinazione

Operator:

Submitter:

File: C:\ASAP 2020 Plus\data\Chiappone\2022-1...\000-225.SMP

|                      |                         |                         |                                  |
|----------------------|-------------------------|-------------------------|----------------------------------|
| Started:             | 24/10/2022 09:45:14     | Analysis adsorptive:    | N2                               |
| Completed:           | 24/10/2022 18:12:00     | Analysis bath temp.:    | 77,159 K                         |
| Report time:         | 24/10/2022 20:01:54     | Thermal correction:     | No                               |
| Sample mass:         | 0,4650 g                | Ambient free space:     | 27,2106 cm <sup>3</sup> Measured |
| Analysis free space: | 81,8113 cm <sup>3</sup> | Equilibration interval: | 10 s                             |
| Low pressure dose:   | None                    | Sample density:         | 1,000 g/cm <sup>3</sup>          |
| Automatic degas:     | Yes                     |                         |                                  |

| Sample prep: Stage | Temperature (°C) | Ramp Rate (°C/min) | Time (min) |
|--------------------|------------------|--------------------|------------|
| 1                  | 30               | 10                 | 10         |

## MP-Method

1,89666 nm and 1,89666 nm hydraulic radius: 0,000000 cm<sup>3</sup>/g

Average pore hydraulic radius (V/A): 0,00000 nm



Sample: resine Cagliari pre-macinazione  
Operator:  
Submitter:  
File: C:\ASAP 2020 Plus\data\Chiappone\2022-1...\000-225.SMP

|                      |                         |                         |                                  |
|----------------------|-------------------------|-------------------------|----------------------------------|
| Started:             | 24/10/2022 09:45:14     | Analysis adsorptive:    | N2                               |
| Completed:           | 24/10/2022 18:12:00     | Analysis bath temp.:    | 77,159 K                         |
| Report time:         | 24/10/2022 20:01:54     | Thermal correction:     | No                               |
| Sample mass:         | 0,4650 g                | Ambient free space:     | 27,2106 cm <sup>3</sup> Measured |
| Analysis free space: | 81,8113 cm <sup>3</sup> | Equilibration interval: | 10 s                             |
| Low pressure dose:   | None                    | Sample density:         | 1,000 g/cm <sup>3</sup>          |
| Automatic degas:     | Yes                     |                         |                                  |

|                    |                  |                    |            |
|--------------------|------------------|--------------------|------------|
| Sample prep: Stage | Temperature (°C) | Ramp Rate (°C/min) | Time (min) |
| 1                  | 30               | 10                 | 10         |

## Isotherm Tabular Report

| Relative Pressure (p/p°) | Absolute Pressure (mmHg) | Quantity Adsorbed (cm <sup>3</sup> /g STP) | Elapsed Time (h:min) | Saturation Pressure (mmHg) |
|--------------------------|--------------------------|--------------------------------------------|----------------------|----------------------------|
| 0.010325733              | 7.684563                 | 3.9811                                     | 01:17                | 744.014038                 |
| 0.030151447              | 22.435867                | 5.1231                                     | 01:37                | 744.214722                 |
| 0.065211970              | 48.522526                | 6.0868                                     | 01:40                | 744.105835                 |
| 0.079628795              | 59.245651                | 6.3611                                     | 01:44                | 744.073914                 |
| 0.100255334              | 74.600983                | 6.7047                                     | 01:46                | 744.022949                 |
| 0.119977546              | 89.278870                | 6.9822                                     | 01:48                | 744.109863                 |
| 0.140335176              | 104.428848               | 7.2456                                     | 01:51                | 744.129822                 |
| 0.160395450              | 119.346550               | 7.4869                                     | 01:53                | 744.138794                 |
| 0.179942753              | 133.891785               | 7.7117                                     | 01:55                | 744.076904                 |
| 0.200404409              | 149.121490               | 7.9326                                     | 01:58                | 744.079895                 |
| 0.249877845              | 185.936066               | 8.4467                                     | 02:00                | 744.102844                 |
| 0.301219408              | 224.137924               | 8.9586                                     | 02:02                | 744.107849                 |
| 0.351548232              | 261.575745               | 9.4673                                     | 02:05                | 744.101868                 |
| 0.401182812              | 298.494019               | 9.9784                                     | 02:07                | 744.067871                 |
| 0.451247824              | 335.705383               | 10.5169                                    | 02:10                | 744.034912                 |
| 0.501321768              | 372.961365               | 11.0927                                    | 02:12                | 743.949036                 |
| 0.551509705              | 410.304504               | 11.7071                                    | 02:15                | 743.956055                 |
| 0.601477567              | 447.472290               | 12.3827                                    | 02:17                | 743.966064                 |
| 0.651666999              | 484.788818               | 12.9827                                    | 02:20                | 743.955078                 |
| 0.701675807              | 521.965515               | 13.1553                                    | 02:23                | 743.921082                 |
| 0.751356749              | 558.938110               | 14.0705                                    | 02:26                | 743.884155                 |
| 0.801005877              | 595.883545               | 15.2306                                    | 02:29                | 743.905090                 |
| 0.821696069              | 611.328735               | 16.9001                                    | 02:33                | 743.919067                 |
| 0.850785444              | 632.926575               | 17.8894                                    | 02:36                | 743.984009                 |
| 0.875133065              | 650.938171               | 19.8150                                    | 02:40                | 743.932068                 |
| 0.899472539              | 668.980286               | 22.3095                                    | 02:45                | 743.816223                 |
| 0.923037342              | 686.279785               | 26.3163                                    | 02:52                | 743.747314                 |
| 0.944354949              | 702.075684               | 33.1115                                    | 03:01                | 743.501648                 |
| 0.962178157              | 715.373352               | 45.3409                                    | 03:12                | 743.444702                 |
| 0.968536147              | 720.179810               | 67.5952                                    | 03:30                | 743.493652                 |
| 0.975048333              | 724.679321               | 81.8660                                    | 03:42                | 743.575562                 |
| 0.980299234              | 728.184448               | 101.7588                                   | 04:02                | 743.223999                 |
| 0.983743039              | 730.651245               | 122.4877                                   | 04:25                | 742.818542                 |
| 0.988803642              | 734.224243               | 132.0595                                   | 04:40                | 742.725708                 |
| 0.973889494              | 723.118774               | 140.4132                                   | 04:57                | 742.537964                 |
| 0.957042628              | 710.368103               | 139.5939                                   | 05:01                | 742.505981                 |
| 0.947026856              | 702.753174               | 132.5184                                   | 05:13                | 742.253357                 |
| 0.942708258              | 699.538147               | 110.1270                                   | 05:31                | 742.062561                 |
| 0.934877335              | 693.391113               | 89.7878                                    | 05:46                | 742.051575                 |
|                          |                          | 67.1028                                    | 06:10                | 741.692078                 |

Sample: resine Cagliari pre-macinazione  
Operator:  
Submitter:  
File: C:\ASAP 2020 Plus\data\Chiappone\2022-1...\000-225.SMP

|                      |                         |                         |                                  |
|----------------------|-------------------------|-------------------------|----------------------------------|
| Started:             | 24/10/2022 09:45:14     | Analysis adsorptive:    | N2                               |
| Completed:           | 24/10/2022 18:12:00     | Analysis bath temp.:    | 77,159 K                         |
| Report time:         | 24/10/2022 20:01:54     | Thermal correction:     | No                               |
| Sample mass:         | 0,4650 g                | Ambient free space:     | 27,2106 cm <sup>3</sup> Measured |
| Analysis free space: | 81,8113 cm <sup>3</sup> | Equilibration interval: | 10 s                             |
| Low pressure dose:   | None                    | Sample density:         | 1,000 g/cm <sup>3</sup>          |
| Automatic degas:     | Yes                     |                         |                                  |

|                    |                  |                    |            |
|--------------------|------------------|--------------------|------------|
| Sample prep: Stage | Temperature (°C) | Ramp Rate (°C/min) | Time (min) |
| 1                  | 30               | 10                 | 10         |

## Isotherm Tabular Report

| Relative Pressure (p/p°) | Absolute Pressure (mmHg) | Quantity Adsorbed (cm <sup>3</sup> /g STP) | Elapsed Time (h:min) | Saturation Pressure (mmHg) |
|--------------------------|--------------------------|--------------------------------------------|----------------------|----------------------------|
| 0.929256511              | 689.147949               | 58.2165                                    | 06:24                | 741.612183                 |
| 0.906389353              | 672.129639               | 38.1797                                    | 06:46                | 741.546265                 |
| 0.870708549              | 645.717651               | 25.9250                                    | 07:03                | 741.600220                 |
| 0.845817091              | 627.197327               | 21.9115                                    | 07:10                | 741.528320                 |
| 0.816648258              | 605.574341               | 18.9695                                    | 07:16                | 741.536316                 |
| 0.803306893              | 595.634705               | 18.0223                                    | 07:20                | 741.478394                 |
| 0.749405336              | 555.670837               | 15.5270                                    | 07:24                | 741.482361                 |
| 0.699621013              | 518.790161               | 14.2010                                    | 07:27                | 741.530273                 |
| 0.650655650              | 482.463348               | 13.2657                                    | 07:30                | 741.503357                 |
| 0.599337509              | 444.412567               | 12.4571                                    | 07:33                | 741.506348                 |
| 0.549150094              | 407.197174               | 11.7657                                    | 07:36                | 741.504333                 |
| 0.499131913              | 370.083069               | 11.1466                                    | 07:38                | 741.453430                 |
| 0.449286253              | 333.108215               | 10.5723                                    | 07:40                | 741.416443                 |
| 0.398859874              | 295.701355               | 10.0243                                    | 07:43                | 741.366516                 |
| 0.348925372              | 258.723755               | 9.5031                                     | 07:45                | 741.487366                 |
| 0.299235834              | 221.848816               | 9.0015                                     | 07:47                | 741.384521                 |
| 0.249335397              | 184.868835               | 8.5012                                     | 07:50                | 741.446411                 |
| 0.199566816              | 147.951157               | 7.9859                                     | 07:53                | 741.361511                 |
| 0.139705208              | 103.565788               | 7.3060                                     | 07:57                | 741.316589                 |
| 0.099980786              | 74.120613                | 6.7675                                     | 08:02                | 741.348572                 |

Sample: resine Cagliari pre-macinazione

Operator:

Submitter:

File: C:\ASAP 2020 Plus\data\Chiappone\2022-1...\000-225.SMP

|                      |                         |                         |                                  |
|----------------------|-------------------------|-------------------------|----------------------------------|
| Started:             | 24/10/2022 09:45:14     | Analysis adsorptive:    | N2                               |
| Completed:           | 24/10/2022 18:12:00     | Analysis bath temp.:    | 77,159 K                         |
| Report time:         | 24/10/2022 20:01:54     | Thermal correction:     | No                               |
| Sample mass:         | 0,4650 g                | Ambient free space:     | 27,2106 cm <sup>3</sup> Measured |
| Analysis free space: | 81,8113 cm <sup>3</sup> | Equilibration interval: | 10 s                             |
| Low pressure dose:   | None                    | Sample density:         | 1,000 g/cm <sup>3</sup>          |
| Automatic degas:     | Yes                     |                         |                                  |

Sample prep: Stage  
1

Temperature (°C)  
30

Ramp Rate (°C/min)  
10

Time (min)  
10

### Isotherm Linear Plot

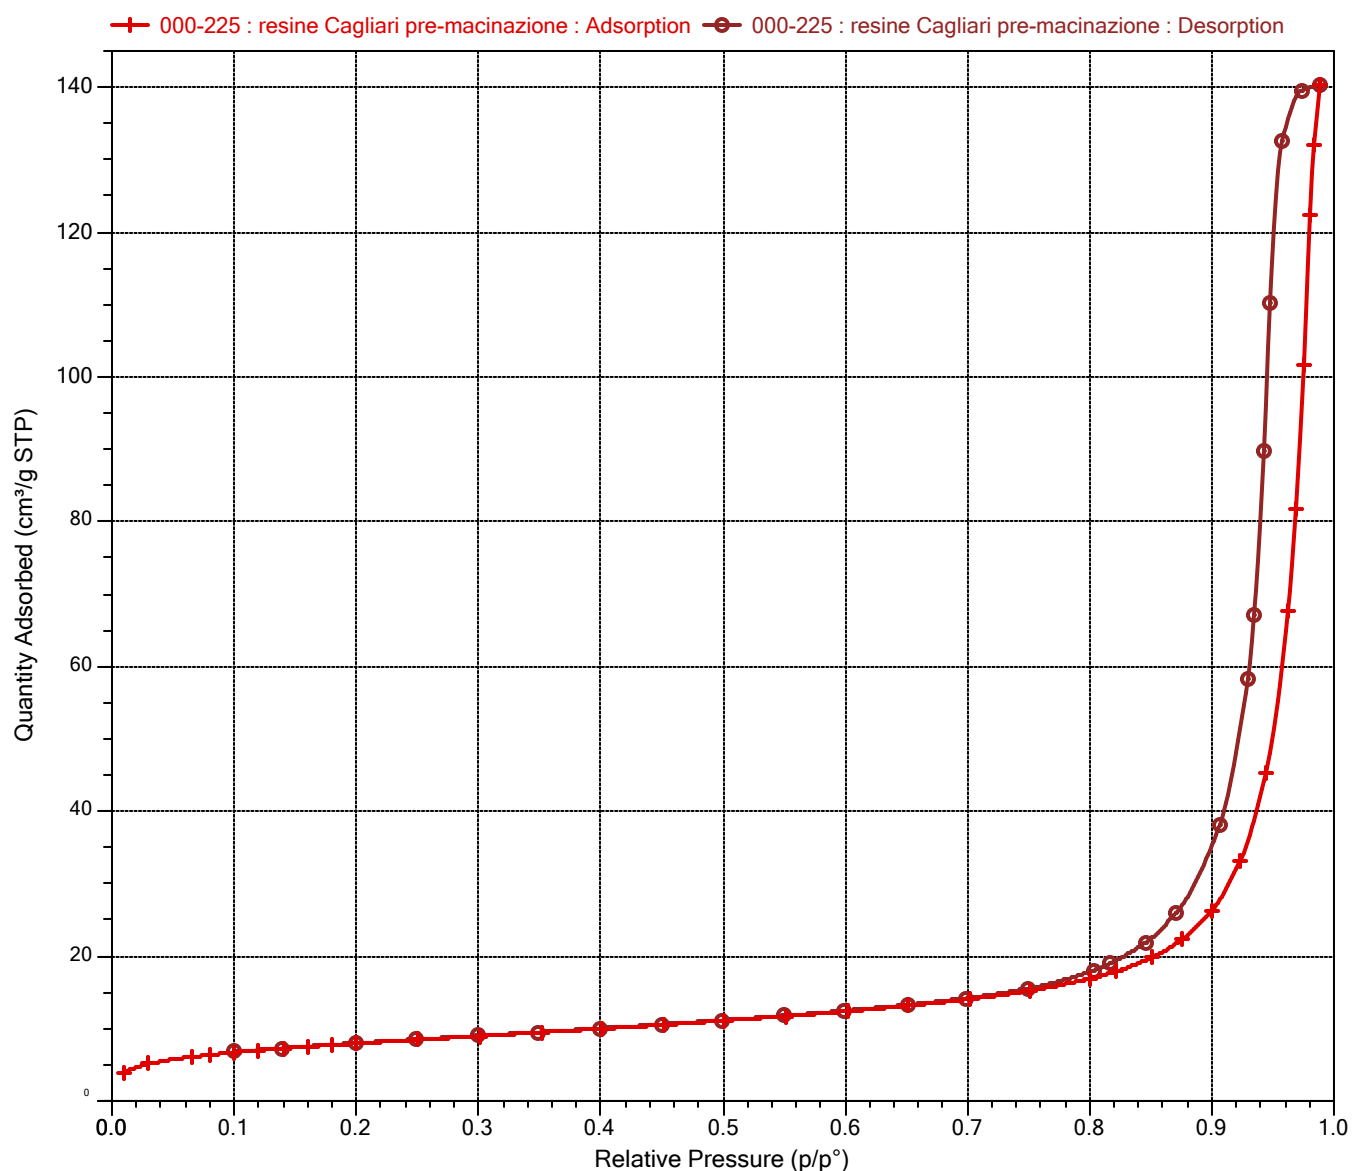

Sample: resine Cagliari pre-macinazione

Operator:

Submitter:

File: C:\ASAP 2020 Plus\data\Chiappone\2022-1...\000-225.SMP

|                      |                         |                         |                                  |
|----------------------|-------------------------|-------------------------|----------------------------------|
| Started:             | 24/10/2022 09:45:14     | Analysis adsorptive:    | N2                               |
| Completed:           | 24/10/2022 18:12:00     | Analysis bath temp.:    | 77,159 K                         |
| Report time:         | 24/10/2022 20:01:54     | Thermal correction:     | No                               |
| Sample mass:         | 0,4650 g                | Ambient free space:     | 27,2106 cm <sup>3</sup> Measured |
| Analysis free space: | 81,8113 cm <sup>3</sup> | Equilibration interval: | 10 s                             |
| Low pressure dose:   | None                    | Sample density:         | 1,000 g/cm <sup>3</sup>          |
| Automatic degas:     | Yes                     |                         |                                  |

Sample prep: Stage  
1

Temperature (°C)  
30

Ramp Rate (°C/min)  
10

Time (min)  
10

### Isotherm Log Plot

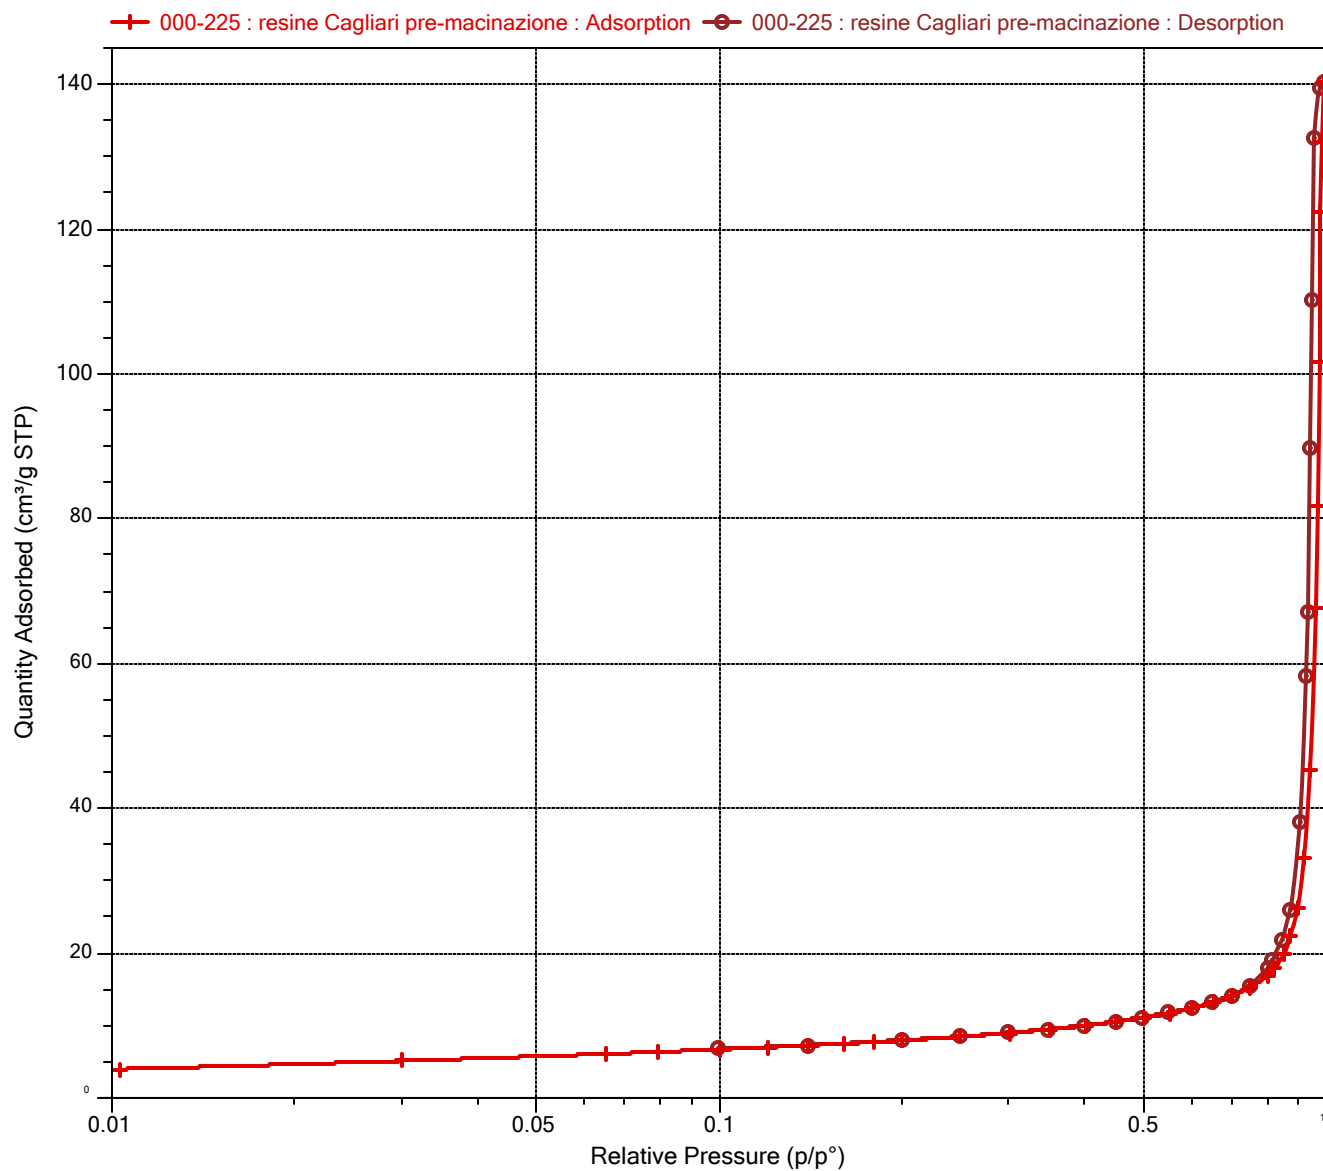

Sample: resine Cagliari pre-macinazione  
Operator:  
Submitter:  
File: C:\ASAP 2020 Plus\data\Chiappone\2022-1...\000-225.SMP

|                                              |                                                      |
|----------------------------------------------|------------------------------------------------------|
| Started: 24/10/2022 09:45:14                 | Analysis adsorptive: N2                              |
| Completed: 24/10/2022 18:12:00               | Analysis bath temp.: 77,159 K                        |
| Report time: 24/10/2022 20:01:54             | Thermal correction: No                               |
| Sample mass: 0,4650 g                        | Ambient free space: 27,2106 cm <sup>3</sup> Measured |
| Analysis free space: 81,8113 cm <sup>3</sup> | Equilibration interval: 10 s                         |
| Low pressure dose: None                      | Sample density: 1,000 g/cm <sup>3</sup>              |
| Automatic degas: Yes                         |                                                      |

| Sample prep: Stage | Temperature (°C) | Ramp Rate (°C/min) | Time (min) |
|--------------------|------------------|--------------------|------------|
| 1                  | 30               | 10                 | 10         |

Isotherm Linear Absolute Plot

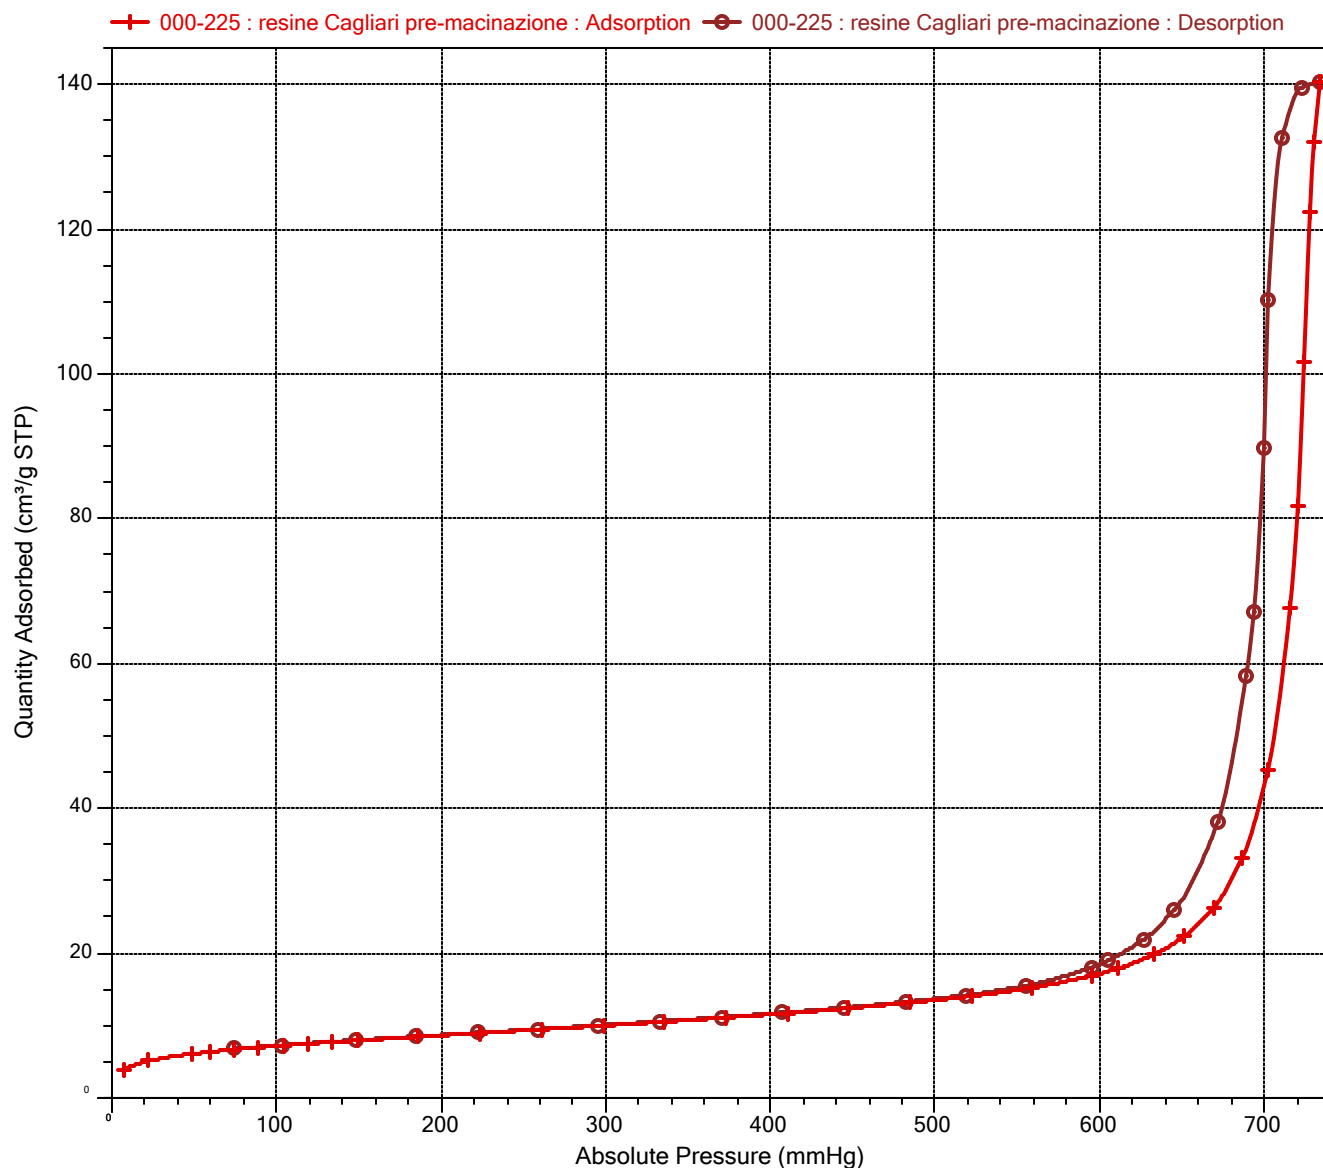

Sample: resine Cagliari pre-macinazione  
Operator:  
Submitter:  
File: C:\ASAP 2020 Plus\data\Chiappone\2022-1...\000-225.SMP

|                      |                         |                         |                                  |
|----------------------|-------------------------|-------------------------|----------------------------------|
| Started:             | 24/10/2022 09:45:14     | Analysis adsorptive:    | N2                               |
| Completed:           | 24/10/2022 18:12:00     | Analysis bath temp.:    | 77,159 K                         |
| Report time:         | 24/10/2022 20:01:54     | Thermal correction:     | No                               |
| Sample mass:         | 0,4650 g                | Ambient free space:     | 27,2106 cm <sup>3</sup> Measured |
| Analysis free space: | 81,8113 cm <sup>3</sup> | Equilibration interval: | 10 s                             |
| Low pressure dose:   | None                    | Sample density:         | 1,000 g/cm <sup>3</sup>          |
| Automatic degas:     | Yes                     |                         |                                  |

| Sample prep: | Stage | Temperature (°C) | Ramp Rate (°C/min) | Time (min) |
|--------------|-------|------------------|--------------------|------------|
|              | 1     | 30               | 10                 | 10         |

### Isotherm Log Absolute Plot

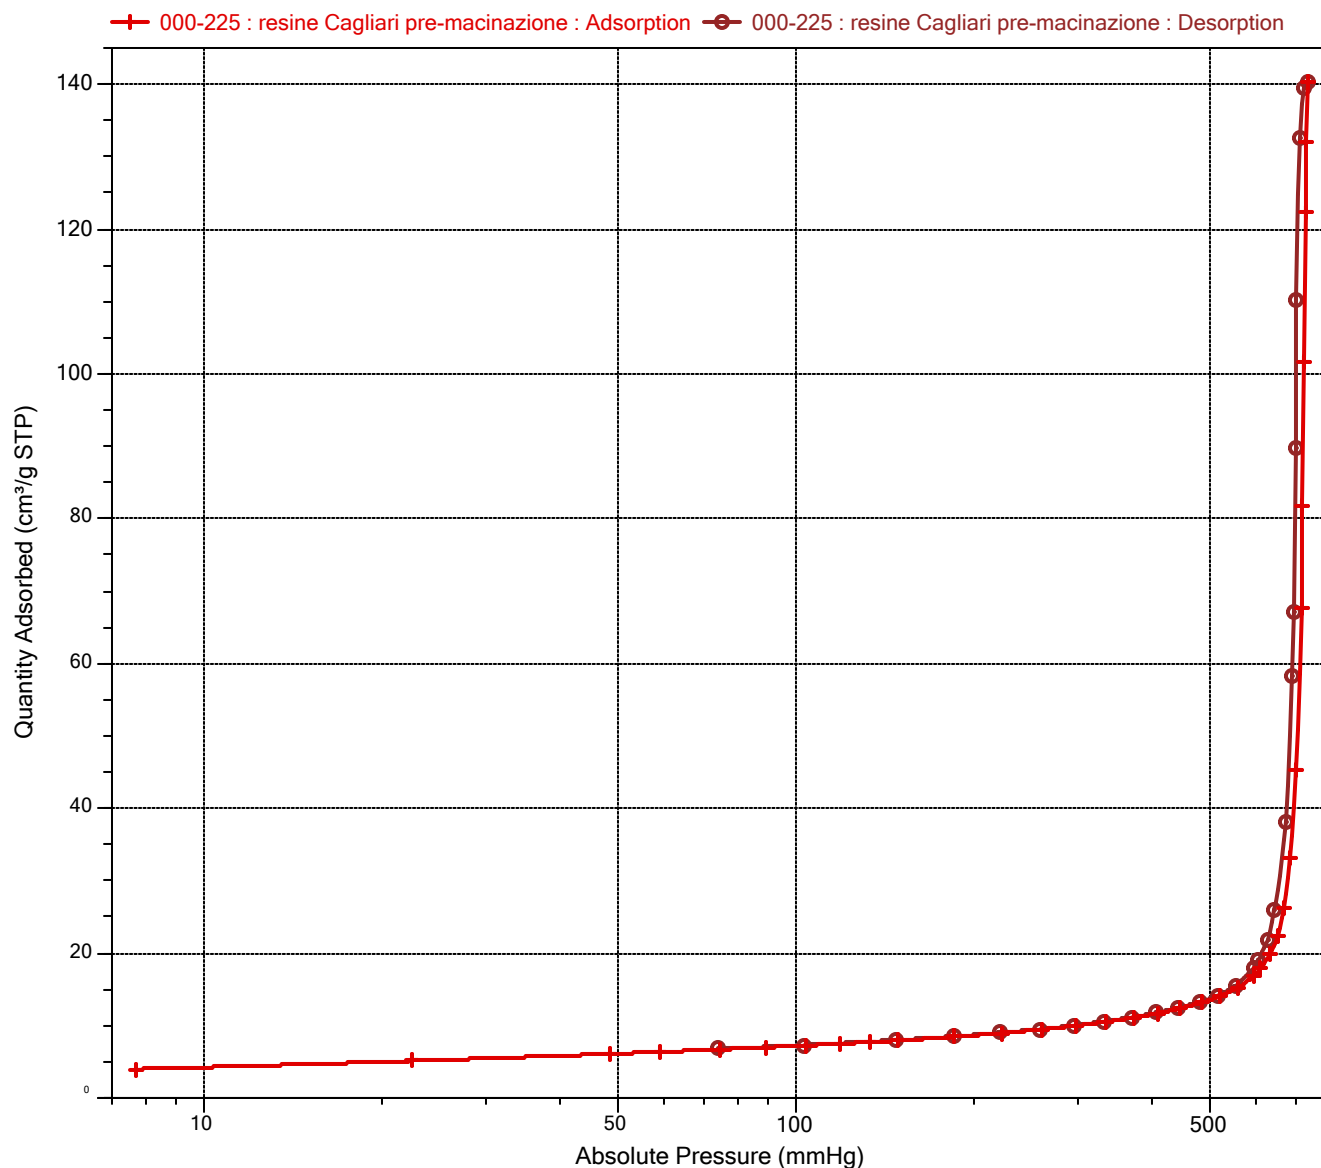

Sample: resine Cagliari pre-macinazione

Operator:

Submitter:

File: C:\ASAP 2020 Plus\data\Chiappone\2022-1...\000-225.SMP

|                      |                         |                         |                                  |
|----------------------|-------------------------|-------------------------|----------------------------------|
| Started:             | 24/10/2022 09:45:14     | Analysis adsorptive:    | N2                               |
| Completed:           | 24/10/2022 18:12:00     | Analysis bath temp.:    | 77,159 K                         |
| Report time:         | 24/10/2022 20:01:54     | Thermal correction:     | No                               |
| Sample mass:         | 0,4650 g                | Ambient free space:     | 27,2106 cm <sup>3</sup> Measured |
| Analysis free space: | 81,8113 cm <sup>3</sup> | Equilibration interval: | 10 s                             |
| Low pressure dose:   | None                    | Sample density:         | 1,000 g/cm <sup>3</sup>          |
| Automatic degas:     | Yes                     |                         |                                  |

Sample prep: Stage  
1

Temperature (°C)  
30

Ramp Rate (°C/min)  
10

Time (min)  
10

### Isotherm Pressure Composition

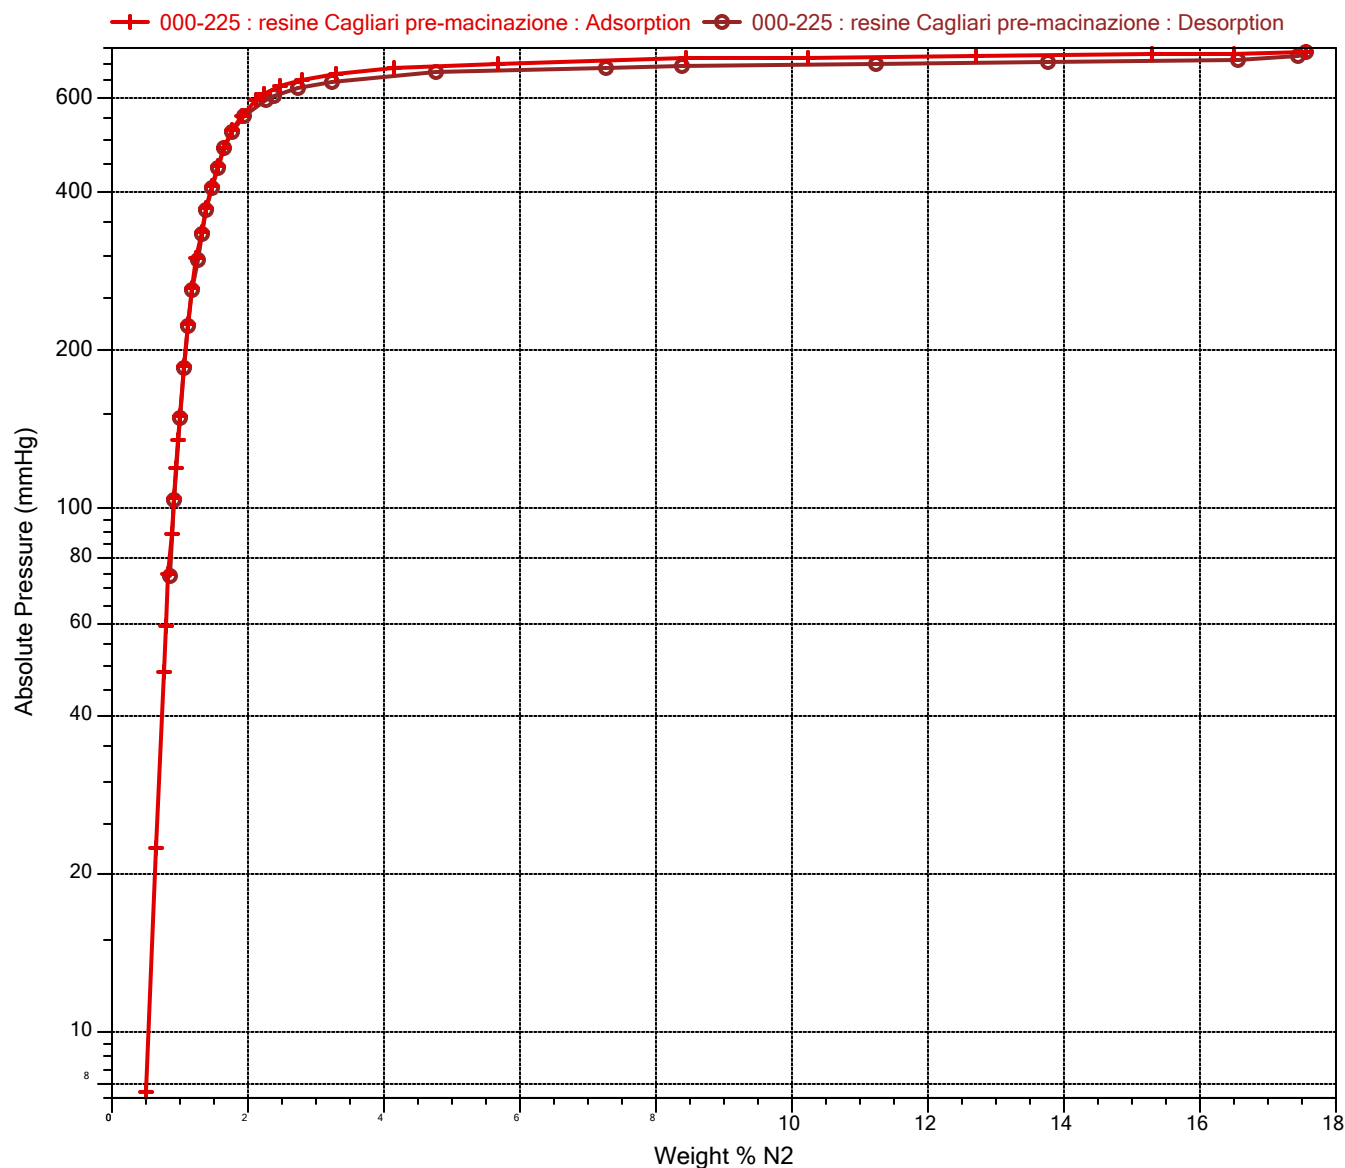

Sample: resine Cagliari pre-macinazione

Operator:

Submitter:

File: C:\ASAP 2020 Plus\data\Chiappone\2022-1...\000-225.SMP

|                      |                         |                         |                                  |
|----------------------|-------------------------|-------------------------|----------------------------------|
| Started:             | 24/10/2022 09:45:14     | Analysis adsorptive:    | N2                               |
| Completed:           | 24/10/2022 18:12:00     | Analysis bath temp.:    | 77,159 K                         |
| Report time:         | 24/10/2022 20:01:54     | Thermal correction:     | No                               |
| Sample mass:         | 0,4650 g                | Ambient free space:     | 27,2106 cm <sup>3</sup> Measured |
| Analysis free space: | 81,8113 cm <sup>3</sup> | Equilibration interval: | 10 s                             |
| Low pressure dose:   | None                    | Sample density:         | 1,000 g/cm <sup>3</sup>          |
| Automatic degas:     | Yes                     |                         |                                  |

| Sample prep: Stage | Temperature (°C) | Ramp Rate (°C/min) | Time (min) |
|--------------------|------------------|--------------------|------------|
| 1                  | 30               | 10                 | 10         |

## BET Report

BET surface area: 28,6015 ± 0,1825 m<sup>2</sup>/g  
 Slope: 0,150686 ± 0,000960 g/cm<sup>3</sup> STP  
 Y-intercept: 0,001494 ± 0,000148 g/cm<sup>3</sup> STP  
 C: 101,859846  
 Qm: 6,5712 cm<sup>3</sup>/g STP  
 Correlation coefficient: 0,9998581  
 Molecular cross-sectional area: 0,1620 nm<sup>2</sup>

| Relative Pressure<br>(p/p°) | Quantity Adsorbed<br>(cm <sup>3</sup> /g STP) | 1/[Q(p°/p - 1)] |
|-----------------------------|-----------------------------------------------|-----------------|
| 0.065211970                 | 6.0868                                        | 0.011461        |
| 0.079628795                 | 6.3611                                        | 0.013601        |
| 0.100255334                 | 6.7047                                        | 0.016619        |
| 0.119977546                 | 6.9822                                        | 0.019526        |
| 0.140335176                 | 7.2456                                        | 0.022530        |
| 0.160395450                 | 7.4869                                        | 0.025516        |
| 0.179942753                 | 7.7117                                        | 0.028454        |
| 0.200404409                 | 7.9326                                        | 0.031595        |
| 0.249877845                 | 8.4467                                        | 0.039437        |



Sample: resine Cagliari pre-macinazione  
Operator:  
Submitter:  
File: C:\ASAP 2020 Plus\data\Chiappone\2022-1...\000-225.SMP

|                                              |                                                      |
|----------------------------------------------|------------------------------------------------------|
| Started: 24/10/2022 09:45:14                 | Analysis adsorptive: N2                              |
| Completed: 24/10/2022 18:12:00               | Analysis bath temp.: 77,159 K                        |
| Report time: 24/10/2022 20:01:54             | Thermal correction: No                               |
| Sample mass: 0,4650 g                        | Ambient free space: 27,2106 cm <sup>3</sup> Measured |
| Analysis free space: 81,8113 cm <sup>3</sup> | Equilibration interval: 10 s                         |
| Low pressure dose: None                      | Sample density: 1,000 g/cm <sup>3</sup>              |
| Automatic degas: Yes                         |                                                      |

| Sample prep: Stage | Temperature (°C) | Ramp Rate (°C/min) | Time (min) |
|--------------------|------------------|--------------------|------------|
| 1                  | 30               | 10                 | 10         |

BET Surface Area Plot

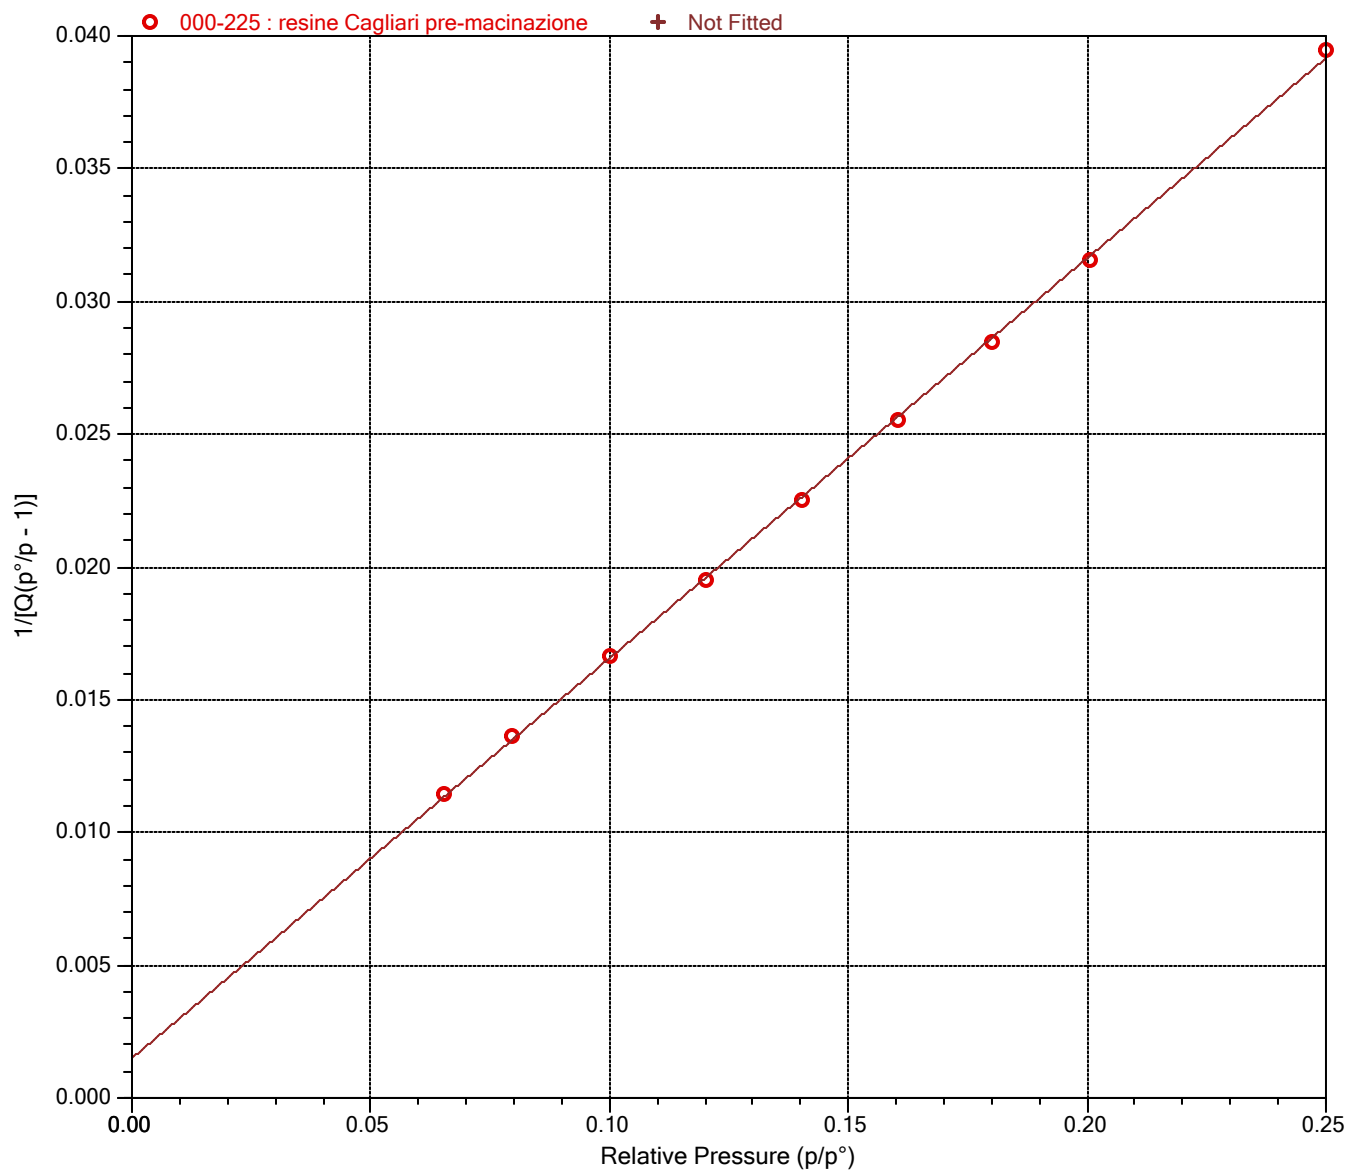

Sample: resine Cagliari pre-macinazione  
Operator:  
Submitter:  
File: C:\ASAP 2020 Plus\data\Chiappone\2022-1...\000-225.SMP

|                      |                         |                         |                                  |
|----------------------|-------------------------|-------------------------|----------------------------------|
| Started:             | 24/10/2022 09:45:14     | Analysis adsorptive:    | N2                               |
| Completed:           | 24/10/2022 18:12:00     | Analysis bath temp.:    | 77,159 K                         |
| Report time:         | 24/10/2022 20:01:54     | Thermal correction:     | No                               |
| Sample mass:         | 0,4650 g                | Ambient free space:     | 27,2106 cm <sup>3</sup> Measured |
| Analysis free space: | 81,8113 cm <sup>3</sup> | Equilibration interval: | 10 s                             |
| Low pressure dose:   | None                    | Sample density:         | 1,000 g/cm <sup>3</sup>          |
| Automatic degas:     | Yes                     |                         |                                  |

| Sample prep: Stage | Temperature (°C) | Ramp Rate (°C/min) | Time (min) |
|--------------------|------------------|--------------------|------------|
| 1                  | 30               | 10                 | 10         |

## Langmuir Report

Langmuir surface area: 535,7181 ± 513,4384 m<sup>2</sup>/g  
Slope: 0,008125 ± 0,007787 g/cm<sup>3</sup> STP  
Y-intercept: 17,328 ± 3,751 g/cm<sup>3</sup> STP·mmHg  
b: 0,000469 1/mmHg  
Qm: 123,0806 cm<sup>3</sup>/g STP  
Correlation coefficient: 0,181388  
Molecular cross-sectional area: 0,1620 nm<sup>2</sup>

| Pressure<br>(mmHg) | Quantity<br>Adsorbed (cm <sup>3</sup> /g<br>STP) | p/Q (g/cm <sup>3</sup><br>STP·mmHg) |
|--------------------|--------------------------------------------------|-------------------------------------|
| 7.684563           | 3.9811                                           | 1.930                               |
| 22.435867          | 5.1231                                           | 4.379                               |
| 48.522526          | 6.0868                                           | 7.972                               |
| 59.245651          | 6.3611                                           | 9.314                               |
| 74.600983          | 6.7047                                           | 11.127                              |
| 89.278870          | 6.9822                                           | 12.787                              |
| 104.428848         | 7.2456                                           | 14.413                              |
| 119.346550         | 7.4869                                           | 15.941                              |
| 133.891785         | 7.7117                                           | 17.362                              |
| 149.121490         | 7.9326                                           | 18.799                              |
| 185.936066         | 8.4467                                           | 22.013                              |
| 224.137924         | 8.9586                                           | 25.019                              |
| 261.575745         | 9.4673                                           | 27.630                              |
| 298.494019         | 9.9784                                           | 29.914                              |
| 335.705383         | 10.5169                                          | 31.921                              |
| 372.961365         | 11.0927                                          | 33.622                              |
| 410.304504         | 11.7071                                          | 35.048                              |
| 447.472290         | 12.3827                                          | 36.137                              |
| 484.788818         | 13.1553                                          | 36.851                              |
| 521.965515         | 14.0705                                          | 37.096                              |
| 558.938110         | 15.2306                                          | 36.698                              |
| 595.883545         | 16.9001                                          | 35.259                              |
| 611.328735         | 17.8894                                          | 34.173                              |
| 632.926575         | 19.8150                                          | 31.942                              |
| 650.938171         | 22.3095                                          | 29.178                              |
| 668.980286         | 26.3163                                          | 25.421                              |
| 686.279785         | 33.1115                                          | 20.726                              |
| 702.075684         | 45.3409                                          | 15.484                              |
| 715.373352         | 67.5952                                          | 10.583                              |
| 720.179810         | 81.8660                                          | 8.797                               |
| 724.679321         | 101.7588                                         | 7.122                               |
| 728.184448         | 122.4877                                         | 5.945                               |

Sample: resine Cagliari pre-macinazione

Operator:

Submitter:

File: C:\ASAP 2020 Plus\data\Chiappone\2022-1...\000-225.SMP

|                      |                         |                         |                                  |
|----------------------|-------------------------|-------------------------|----------------------------------|
| Started:             | 24/10/2022 09:45:14     | Analysis adsorptive:    | N2                               |
| Completed:           | 24/10/2022 18:12:00     | Analysis bath temp.:    | 77,159 K                         |
| Report time:         | 24/10/2022 20:01:54     | Thermal correction:     | No                               |
| Sample mass:         | 0,4650 g                | Ambient free space:     | 27,2106 cm <sup>3</sup> Measured |
| Analysis free space: | 81,8113 cm <sup>3</sup> | Equilibration interval: | 10 s                             |
| Low pressure dose:   | None                    | Sample density:         | 1,000 g/cm <sup>3</sup>          |
| Automatic degas:     | Yes                     |                         |                                  |

| Sample prep: Stage | Temperature (°C)   | Ramp Rate (°C/min)                               | Time (min)                          |
|--------------------|--------------------|--------------------------------------------------|-------------------------------------|
|                    | 30                 | 10                                               | 10                                  |
|                    | Pressure<br>(mmHg) | Quantity<br>Adsorbed (cm <sup>3</sup> /g<br>STP) | p/Q (g/cm <sup>3</sup><br>STP·mmHg) |
|                    | 730.651245         | 132.0595                                         | 5.533                               |
|                    | 734.224243         | 140.4132                                         | 5.229                               |

Sample: resine Cagliari pre-macinazione

Operator:

Submitter:

File: C:\ASAP 2020 Plus\data\Chiappone\2022-1...\000-225.SMP

|                      |                         |                         |                                  |
|----------------------|-------------------------|-------------------------|----------------------------------|
| Started:             | 24/10/2022 09:45:14     | Analysis adsorptive:    | N2                               |
| Completed:           | 24/10/2022 18:12:00     | Analysis bath temp.:    | 77,159 K                         |
| Report time:         | 24/10/2022 20:01:54     | Thermal correction:     | No                               |
| Sample mass:         | 0,4650 g                | Ambient free space:     | 27,2106 cm <sup>3</sup> Measured |
| Analysis free space: | 81,8113 cm <sup>3</sup> | Equilibration interval: | 10 s                             |
| Low pressure dose:   | None                    | Sample density:         | 1,000 g/cm <sup>3</sup>          |
| Automatic degas:     | Yes                     |                         |                                  |

Sample prep: Stage  
1

Temperature (°C)  
30

Ramp Rate (°C/min)  
10

Time (min)  
10

Langmuir Surface Area Plot

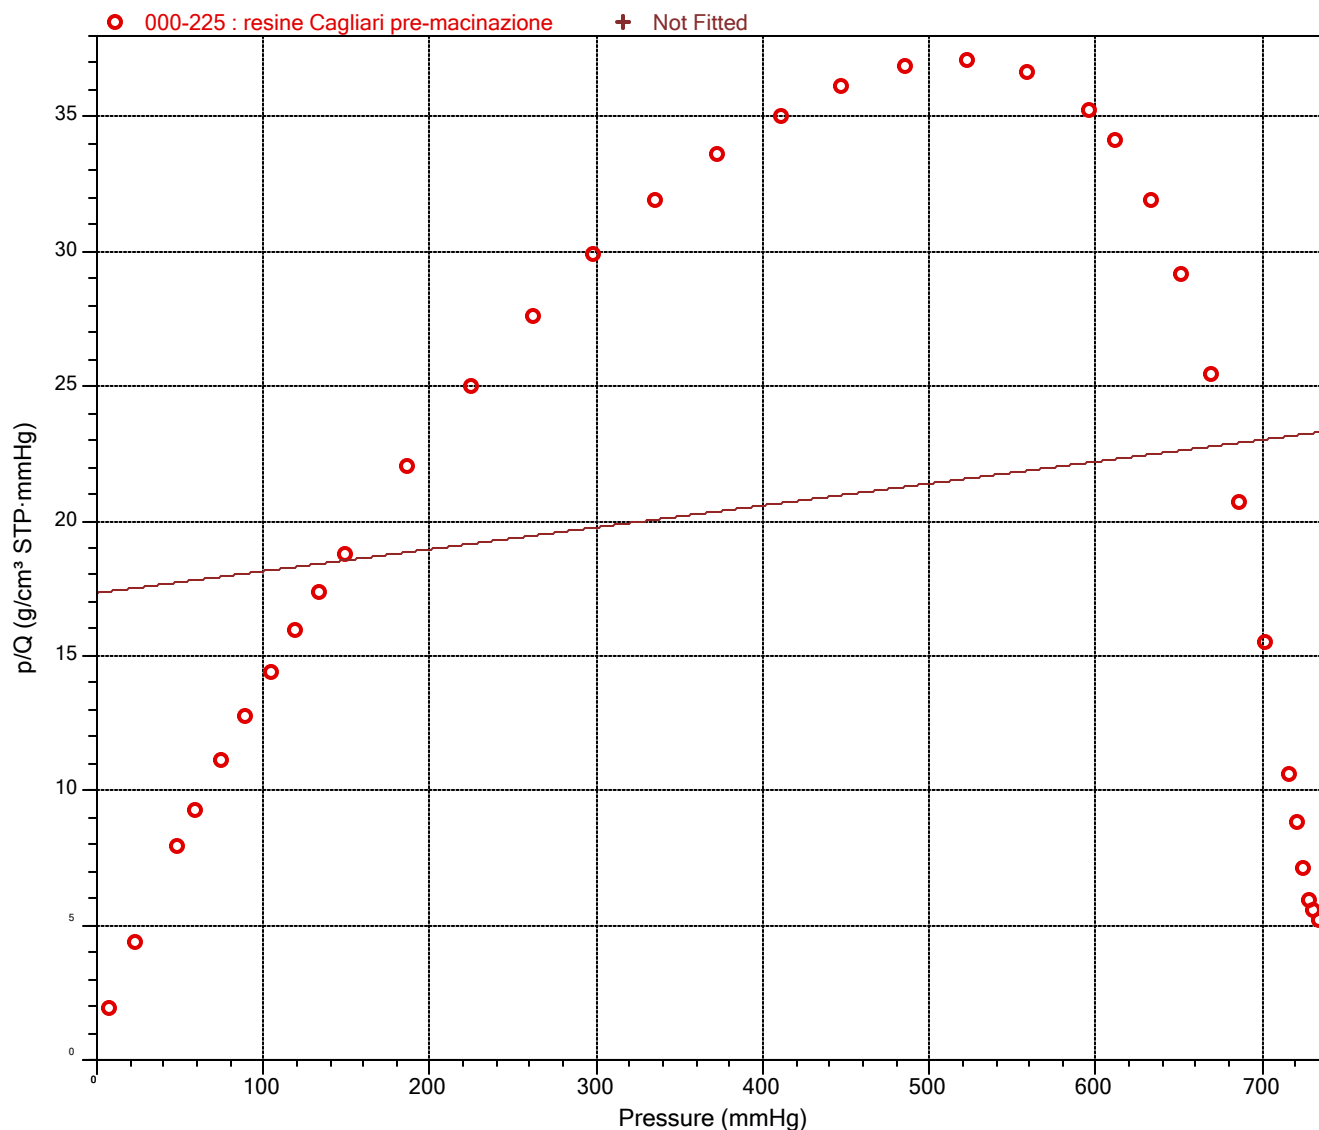

Sample: resine Cagliari pre-macinazione

Operator:

Submitter:

File: C:\ASAP 2020 Plus\data\Chiappone\2022-1...\000-225.SMP

|                      |                         |                         |                                  |
|----------------------|-------------------------|-------------------------|----------------------------------|
| Started:             | 24/10/2022 09:45:14     | Analysis adsorptive:    | N2                               |
| Completed:           | 24/10/2022 18:12:00     | Analysis bath temp.:    | 77,159 K                         |
| Report time:         | 24/10/2022 20:01:54     | Thermal correction:     | No                               |
| Sample mass:         | 0,4650 g                | Ambient free space:     | 27,2106 cm <sup>3</sup> Measured |
| Analysis free space: | 81,8113 cm <sup>3</sup> | Equilibration interval: | 10 s                             |
| Low pressure dose:   | None                    | Sample density:         | 1,000 g/cm <sup>3</sup>          |
| Automatic degas:     | Yes                     |                         |                                  |

|                    |                  |                    |            |
|--------------------|------------------|--------------------|------------|
| Sample prep: Stage | Temperature (°C) | Ramp Rate (°C/min) | Time (min) |
| 1                  | 30               | 10                 | 10         |

### Freundlich Tabular Report

Qm·C: 0,3865 ± 0,0996 cm<sup>3</sup>/g STP

m: 1,4920 ± 0,2311

Correlation coefficient: 0,752104

| Absolute Pressure (mmHg) | Quantity Adsorbed (cm <sup>3</sup> /g STP) | log(p)  | log(Q) |
|--------------------------|--------------------------------------------|---------|--------|
| 7.684563                 | 3.9811                                     | 0.88562 | 0.6000 |
| 22.435867                | 5.1231                                     | 1.35094 | 0.7095 |
| 48.522526                | 6.0868                                     | 1.68594 | 0.7844 |
| 59.245651                | 6.3611                                     | 1.77266 | 0.8035 |
| 74.600983                | 6.7047                                     | 1.87274 | 0.8264 |
| 89.278870                | 6.9822                                     | 1.95075 | 0.8440 |
| 104.428848               | 7.2456                                     | 2.01882 | 0.8601 |
| 119.346550               | 7.4869                                     | 2.07681 | 0.8743 |
| 133.891785               | 7.7117                                     | 2.12675 | 0.8872 |
| 149.121490               | 7.9326                                     | 2.17354 | 0.8994 |
| 185.936066               | 8.4467                                     | 2.26936 | 0.9267 |
| 224.137924               | 8.9586                                     | 2.35052 | 0.9522 |
| 261.575745               | 9.4673                                     | 2.41760 | 0.9762 |
| 298.494019               | 9.9784                                     | 2.47494 | 0.9991 |
| 335.705383               | 10.5169                                    | 2.52596 | 1.0219 |
| 372.961365               | 11.0927                                    | 2.57166 | 1.0450 |
| 410.304504               | 11.7071                                    | 2.61311 | 1.0684 |
| 447.472290               | 12.3827                                    | 2.65077 | 1.0928 |
| 484.788818               | 13.1553                                    | 2.68555 | 1.1191 |
| 521.965515               | 14.0705                                    | 2.71764 | 1.1483 |
| 558.938110               | 15.2306                                    | 2.74736 | 1.1827 |
| 595.883545               | 16.9001                                    | 2.77516 | 1.2279 |
| 611.328735               | 17.8894                                    | 2.78627 | 1.2526 |
| 632.926575               | 19.8150                                    | 2.80135 | 1.2970 |
| 650.938171               | 22.3095                                    | 2.81354 | 1.3485 |
| 668.980286               | 26.3163                                    | 2.82541 | 1.4202 |
| 686.279785               | 33.1115                                    | 2.83650 | 1.5200 |
| 702.075684               | 45.3409                                    | 2.84638 | 1.6565 |
| 715.373352               | 67.5952                                    | 2.85453 | 1.8299 |
| 720.179810               | 81.8660                                    | 2.85744 | 1.9131 |
| 724.679321               | 101.7588                                   | 2.86015 | 2.0076 |
| 728.184448               | 122.4877                                   | 2.86224 | 2.0881 |
| 730.651245               | 132.0595                                   | 2.86371 | 2.1208 |
| 734.224243               | 140.4132                                   | 2.86583 | 2.1474 |

Sample: resine Cagliari pre-macinazione

Operator:

Submitter:

File: C:\ASAP 2020 Plus\data\Chiappone\2022-1...\000-225.SMP

|                      |                         |                         |                                  |
|----------------------|-------------------------|-------------------------|----------------------------------|
| Started:             | 24/10/2022 09:45:14     | Analysis adsorptive:    | N2                               |
| Completed:           | 24/10/2022 18:12:00     | Analysis bath temp.:    | 77,159 K                         |
| Report time:         | 24/10/2022 20:01:54     | Thermal correction:     | No                               |
| Sample mass:         | 0,4650 g                | Ambient free space:     | 27,2106 cm <sup>3</sup> Measured |
| Analysis free space: | 81,8113 cm <sup>3</sup> | Equilibration interval: | 10 s                             |
| Low pressure dose:   | None                    | Sample density:         | 1,000 g/cm <sup>3</sup>          |
| Automatic degas:     | Yes                     |                         |                                  |

Sample prep: Stage  
1

Temperature (°C)  
30

Ramp Rate (°C/min)  
10

Time (min)  
10

Freundlich Plot

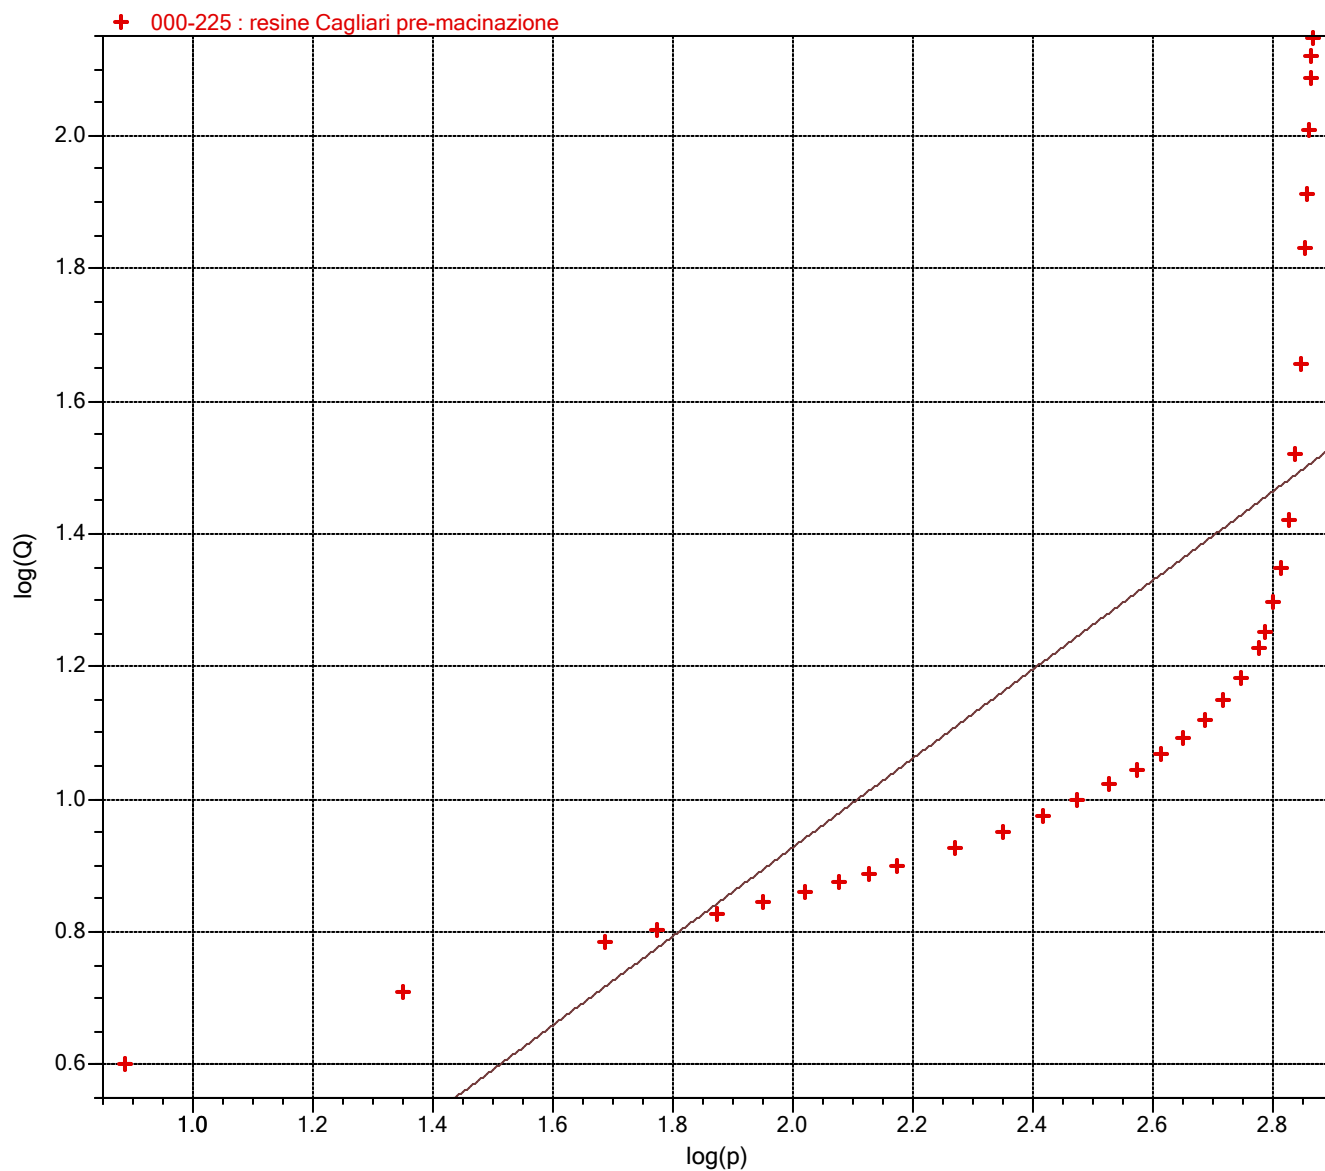

Sample: resine Cagliari pre-macinazione  
Operator:  
Submitter:  
File: C:\ASAP 2020 Plus\data\Chiappone\2022-1...\000-225.SMP

|                      |                         |                         |                                  |
|----------------------|-------------------------|-------------------------|----------------------------------|
| Started:             | 24/10/2022 09:45:14     | Analysis adsorptive:    | N2                               |
| Completed:           | 24/10/2022 18:12:00     | Analysis bath temp.:    | 77,159 K                         |
| Report time:         | 24/10/2022 20:01:54     | Thermal correction:     | No                               |
| Sample mass:         | 0,4650 g                | Ambient free space:     | 27,2106 cm <sup>3</sup> Measured |
| Analysis free space: | 81,8113 cm <sup>3</sup> | Equilibration interval: | 10 s                             |
| Low pressure dose:   | None                    | Sample density:         | 1,000 g/cm <sup>3</sup>          |
| Automatic degas:     | Yes                     |                         |                                  |

| Sample prep: Stage | Temperature (°C) | Ramp Rate (°C/min) | Time (min) |
|--------------------|------------------|--------------------|------------|
| 1                  | 30               | 10                 | 10         |

## t-Plot Report

Micropore volume: 0,000298 cm<sup>3</sup>/g  
 Micropore area: 1,2312 m<sup>2</sup>/g  
 External surface area: 27,3703 m<sup>2</sup>/g  
 Slope: 17,694798 ± 0,317361 cm<sup>3</sup>/g·nm STP  
 Y-intercept: 0,192358 ± 0,129039 cm<sup>3</sup>/g STP  
 Correlation coefficient: 0,999036  
 Surface area correction factor: 1,000  
 Density conversion factor: 0,0015468  
 Total surface area (BET): 28,6015 m<sup>2</sup>/g  
 Thickness range: 0,35000 to 0,50000 nm  
 Thickness equation: Harkins and Jura

## Thickness Curve

$$t = [ 13.99 / ( 0.034 - \log(p/p^0) ) ] ^{0.5}$$

## t-Plot Report - Data

| Relative Pressure (p/p°) | Statistical Thickness (nm) | Quantity Adsorbed (cm <sup>3</sup> /g STP) | Fitted |
|--------------------------|----------------------------|--------------------------------------------|--------|
| 0.065211970              | 0.33868                    | 6.0868                                     |        |
| 0.079628795              | 0.35140                    | 6.3611                                     |        |
| 0.100255334              | 0.36803                    | 6.7047                                     |        |
| 0.119977546              | 0.38276                    | 6.9822                                     |        |
| 0.140335176              | 0.39718                    | 7.2456                                     |        |
| 0.160395450              | 0.41085                    | 7.4869                                     |        |
| 0.179942753              | 0.42382                    | 7.7117                                     |        |
| 0.200404409              | 0.43715                    | 7.9326                                     |        |
| 0.249877845              | 0.46891                    | 8.4467                                     |        |
| 0.301219408              | 0.50201                    | 8.9586                                     |        |
| 0.351548232              | 0.53542                    | 9.4673                                     |        |
| 0.401182812              | 0.56996                    | 9.9784                                     |        |
| 0.451247824              | 0.60709                    | 10.5169                                    |        |
| 0.501321768              | 0.64731                    | 11.0927                                    |        |
| 0.551509705              | 0.69165                    | 11.7071                                    |        |
| 0.601477567              | 0.74101                    | 12.3827                                    |        |
| 0.651666999              | 0.79749                    | 13.1553                                    |        |

Sample: resine Cagliari pre-macinazione

Operator:

Submitter:

File: C:\ASAP 2020 Plus\data\Chiappone\2022-1...\000-225.SMP

|                      |                         |                         |                                  |
|----------------------|-------------------------|-------------------------|----------------------------------|
| Started:             | 24/10/2022 09:45:14     | Analysis adsorptive:    | N2                               |
| Completed:           | 24/10/2022 18:12:00     | Analysis bath temp.:    | 77,159 K                         |
| Report time:         | 24/10/2022 20:01:54     | Thermal correction:     | No                               |
| Sample mass:         | 0,4650 g                | Ambient free space:     | 27,2106 cm <sup>3</sup> Measured |
| Analysis free space: | 81,8113 cm <sup>3</sup> | Equilibration interval: | 10 s                             |
| Low pressure dose:   | None                    | Sample density:         | 1,000 g/cm <sup>3</sup>          |
| Automatic degas:     | Yes                     |                         |                                  |

Sample prep: Stage  
1

Temperature (°C)  
30

Ramp Rate (°C/min)  
10

Time (min)  
10

### t-Plot

Harkins and Jura

○ 000-225 : resine Cagliari pre-macinazione

+ Not Fitted

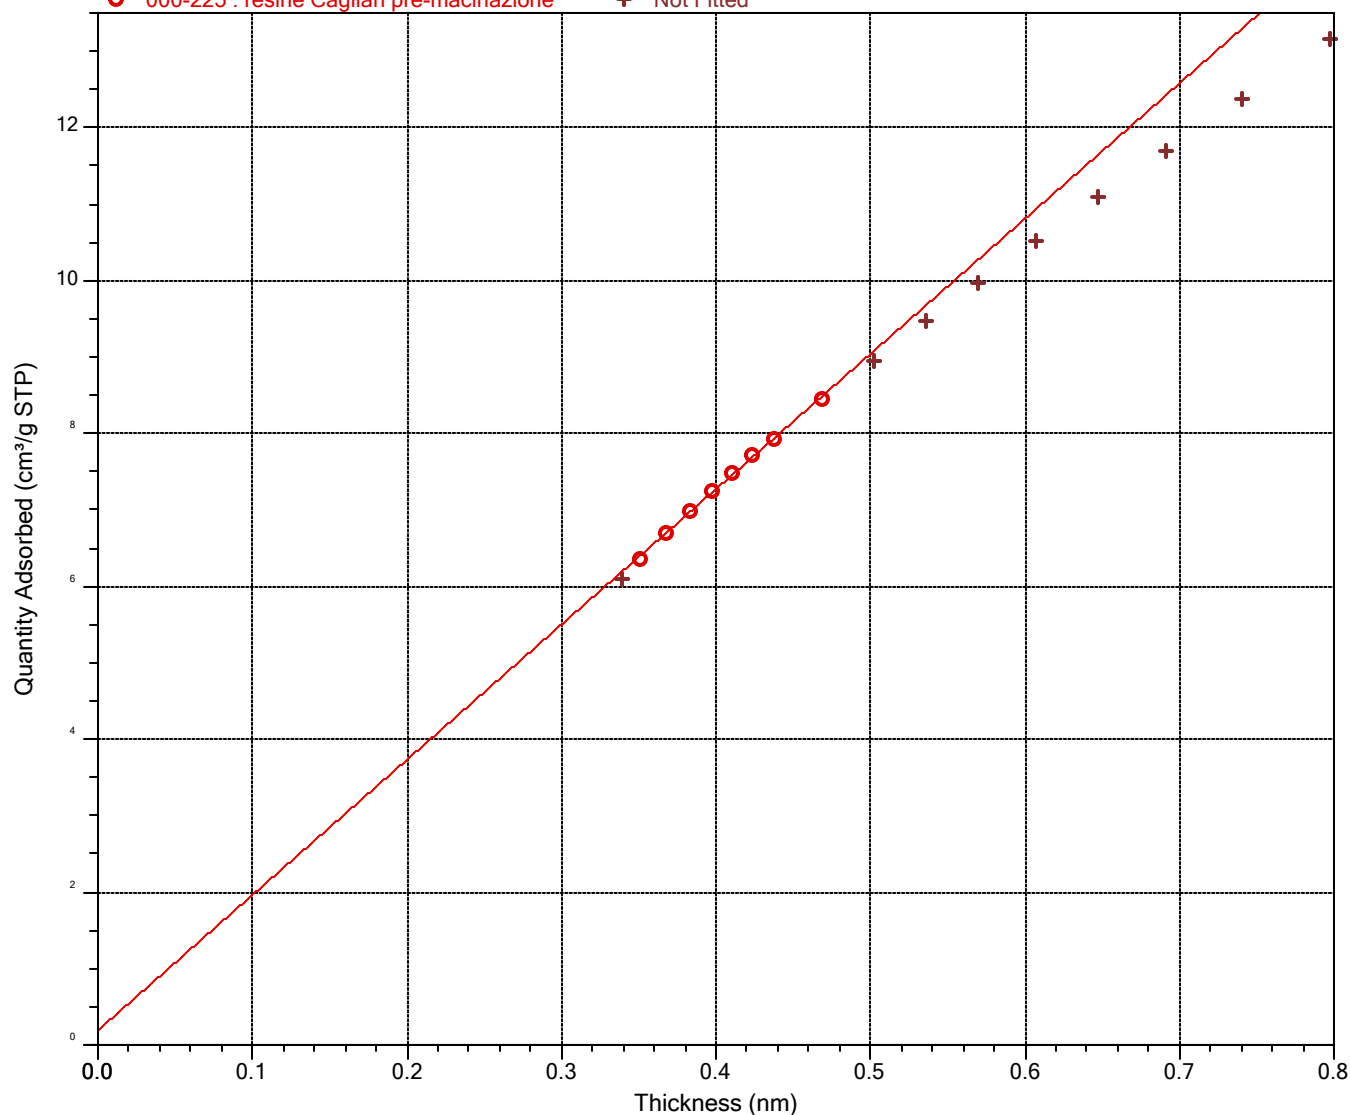



Sample: resine Cagliari pre-macinazione  
Operator:  
Submitter:  
File: C:\ASAP 2020 Plus\data\Chiappone\2022-1...\000-225.SMP

|                      |                         |                         |                                  |
|----------------------|-------------------------|-------------------------|----------------------------------|
| Started:             | 24/10/2022 09:45:14     | Analysis adsorptive:    | N2                               |
| Completed:           | 24/10/2022 18:12:00     | Analysis bath temp.:    | 77,159 K                         |
| Report time:         | 24/10/2022 20:01:54     | Thermal correction:     | No                               |
| Sample mass:         | 0,4650 g                | Ambient free space:     | 27,2106 cm <sup>3</sup> Measured |
| Analysis free space: | 81,8113 cm <sup>3</sup> | Equilibration interval: | 10 s                             |
| Low pressure dose:   | None                    | Sample density:         | 1,000 g/cm <sup>3</sup>          |
| Automatic degas:     | Yes                     |                         |                                  |

| Sample prep: Stage | Temperature (°C) | Ramp Rate (°C/min) | Time (min) |
|--------------------|------------------|--------------------|------------|
| 1                  | 30               | 10                 | 10         |

## BJH Adsorption Pore Distribution Report

Faas Correction

Harkins and Jura

$$t = [ 13.99 / ( 0.034 - \log(p/p^0) ) ] ^{0.5}$$

Width range: 1,7000 to 300,0000 nm  
Adsorbate property factor: 0,95300 nm  
Density conversion factor: 0,0015468  
Fraction of pores open at both ends: 0,00

| Pore Width Range (nm) | Average Width (nm) | Incremental Pore Volume (cm <sup>3</sup> /g) | Cumulative Pore Volume (cm <sup>3</sup> /g) | Incremental Pore Area (m <sup>2</sup> /g) | Cumulative Pore Area (m <sup>2</sup> /g) |
|-----------------------|--------------------|----------------------------------------------|---------------------------------------------|-------------------------------------------|------------------------------------------|
| 173.1 - 120.0         | 137.0              | 0.013646                                     | 0.013646                                    | 0.398                                     | 0.398                                    |
| 120.0 - 99.4          | 107.7              | 0.015840                                     | 0.029487                                    | 0.588                                     | 0.987                                    |
| 99.4 - 79.0           | 86.8               | 0.034788                                     | 0.064275                                    | 1.603                                     | 2.590                                    |
| 79.0 - 63.0           | 69.2               | 0.033903                                     | 0.098178                                    | 1.961                                     | 4.551                                    |
| 63.0 - 52.8           | 56.9               | 0.024652                                     | 0.122830                                    | 1.732                                     | 6.282                                    |
| 52.8 - 36.4           | 41.5               | 0.039337                                     | 0.162167                                    | 3.792                                     | 10.074                                   |
| 36.4 - 26.7           | 30.0               | 0.021762                                     | 0.183929                                    | 2.906                                     | 12.980                                   |
| 26.7 - 20.6           | 22.8               | 0.011820                                     | 0.195749                                    | 2.071                                     | 15.051                                   |
| 20.6 - 16.8           | 18.3               | 0.006612                                     | 0.202361                                    | 1.448                                     | 16.499                                   |
| 16.8 - 14.1           | 15.2               | 0.003765                                     | 0.206126                                    | 0.992                                     | 17.490                                   |
| 14.1 - 11.9           | 12.8               | 0.002520                                     | 0.208645                                    | 0.789                                     | 18.279                                   |
| 11.9 - 10.7           | 11.2               | 0.001096                                     | 0.209741                                    | 0.392                                     | 18.671                                   |
| 10.7 - 8.5            | 9.3                | 0.001435                                     | 0.211176                                    | 0.614                                     | 19.285                                   |
| 8.5 - 7.1             | 7.7                | 0.000653                                     | 0.211829                                    | 0.340                                     | 19.625                                   |
| 7.1 - 6.0             | 6.5                | 0.000367                                     | 0.212196                                    | 0.227                                     | 19.852                                   |
| 6.0 - 5.2             | 5.6                | 0.000258                                     | 0.212455                                    | 0.186                                     | 20.037                                   |
| 5.2 - 4.6             | 4.9                | 0.000218                                     | 0.212672                                    | 0.179                                     | 20.216                                   |
| 4.6 - 4.1             | 4.3                | 0.000211                                     | 0.212883                                    | 0.197                                     | 20.413                                   |
| 4.1 - 3.6             | 3.8                | 0.000245                                     | 0.213128                                    | 0.258                                     | 20.671                                   |
| 3.6 - 3.2             | 3.4                | 0.000241                                     | 0.213369                                    | 0.284                                     | 20.955                                   |
| 3.2 - 2.9             | 3.0                | 0.000252                                     | 0.213621                                    | 0.332                                     | 21.287                                   |
| 2.9 - 2.6             | 2.7                | 0.000288                                     | 0.213909                                    | 0.423                                     | 21.710                                   |
| 2.6 - 2.3             | 2.4                | 0.000303                                     | 0.214212                                    | 0.498                                     | 22.208                                   |
| 2.3 - 2.1             | 2.2                | 0.000372                                     | 0.214584                                    | 0.687                                     | 22.895                                   |
| 2.1 - 2.0             | 2.0                | 0.000172                                     | 0.214756                                    | 0.342                                     | 23.237                                   |
| 2.0 - 1.9             | 1.9                | 0.000209                                     | 0.214965                                    | 0.439                                     | 23.675                                   |
| 1.9 - 1.8             | 1.8                | 0.000235                                     | 0.215200                                    | 0.518                                     | 24.194                                   |
| 1.8 - 1.7             | 1.7                | 0.000284                                     | 0.215483                                    | 0.663                                     | 24.857                                   |

Sample: resine Cagliari pre-macinazione  
Operator:  
Submitter:  
File: C:\ASAP 2020 Plus\data\Chiappone\2022-1...\000-225.SMP

|                      |                         |                         |                                  |
|----------------------|-------------------------|-------------------------|----------------------------------|
| Started:             | 24/10/2022 09:45:14     | Analysis adsorptive:    | N2                               |
| Completed:           | 24/10/2022 18:12:00     | Analysis bath temp.:    | 77,159 K                         |
| Report time:         | 24/10/2022 20:01:54     | Thermal correction:     | No                               |
| Sample mass:         | 0,4650 g                | Ambient free space:     | 27,2106 cm <sup>3</sup> Measured |
| Analysis free space: | 81,8113 cm <sup>3</sup> | Equilibration interval: | 10 s                             |
| Low pressure dose:   | None                    | Sample density:         | 1,000 g/cm <sup>3</sup>          |
| Automatic degas:     | Yes                     |                         |                                  |

| Sample prep: Stage | Temperature (°C) | Ramp Rate (°C/min) | Time (min) |
|--------------------|------------------|--------------------|------------|
| 1                  | 30               | 10                 | 10         |

### BJH Adsorption Cumulative Pore Volume (Larger)

Harkins and Jura : Faas Correction

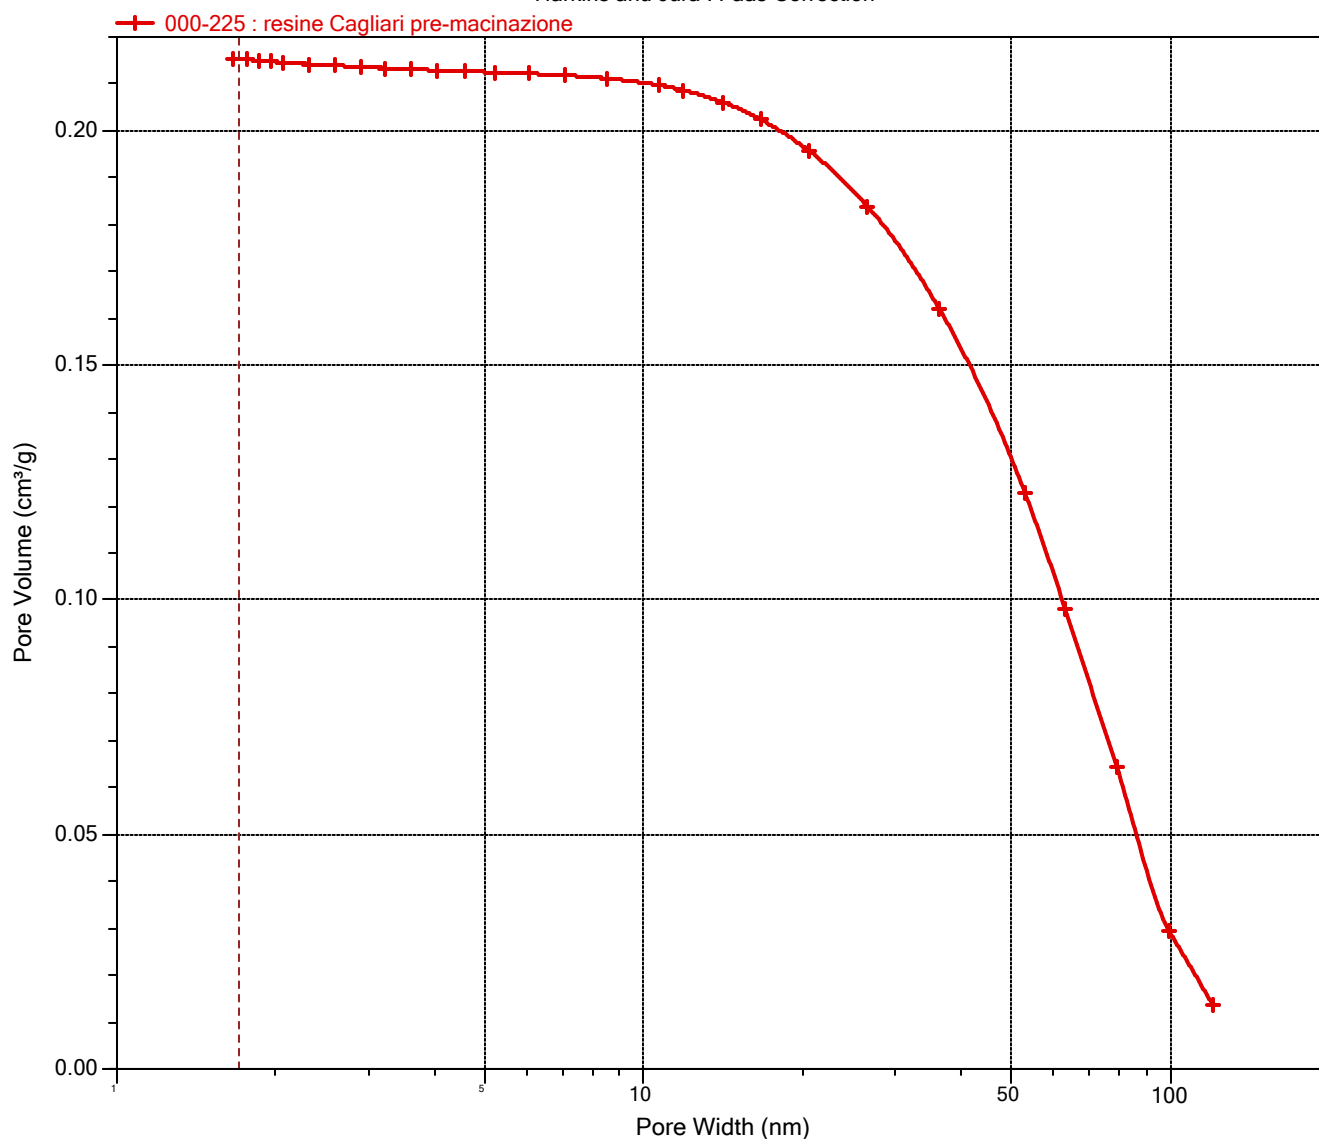

Sample: resine Cagliari pre-macinazione

Operator:

Submitter:

File: C:\ASAP 2020 Plus\data\Chiappone\2022-1...\000-225.SMP

|                      |                         |                         |                                  |
|----------------------|-------------------------|-------------------------|----------------------------------|
| Started:             | 24/10/2022 09:45:14     | Analysis adsorptive:    | N2                               |
| Completed:           | 24/10/2022 18:12:00     | Analysis bath temp.:    | 77,159 K                         |
| Report time:         | 24/10/2022 20:01:54     | Thermal correction:     | No                               |
| Sample mass:         | 0,4650 g                | Ambient free space:     | 27,2106 cm <sup>3</sup> Measured |
| Analysis free space: | 81,8113 cm <sup>3</sup> | Equilibration interval: | 10 s                             |
| Low pressure dose:   | None                    | Sample density:         | 1,000 g/cm <sup>3</sup>          |
| Automatic degas:     | Yes                     |                         |                                  |

Sample prep: Stage  
1

Temperature (°C)  
30

Ramp Rate (°C/min)  
10

Time (min)  
10

### BJH Adsorption dV/dw Pore Volume

Harkins and Jura : Faas Correction

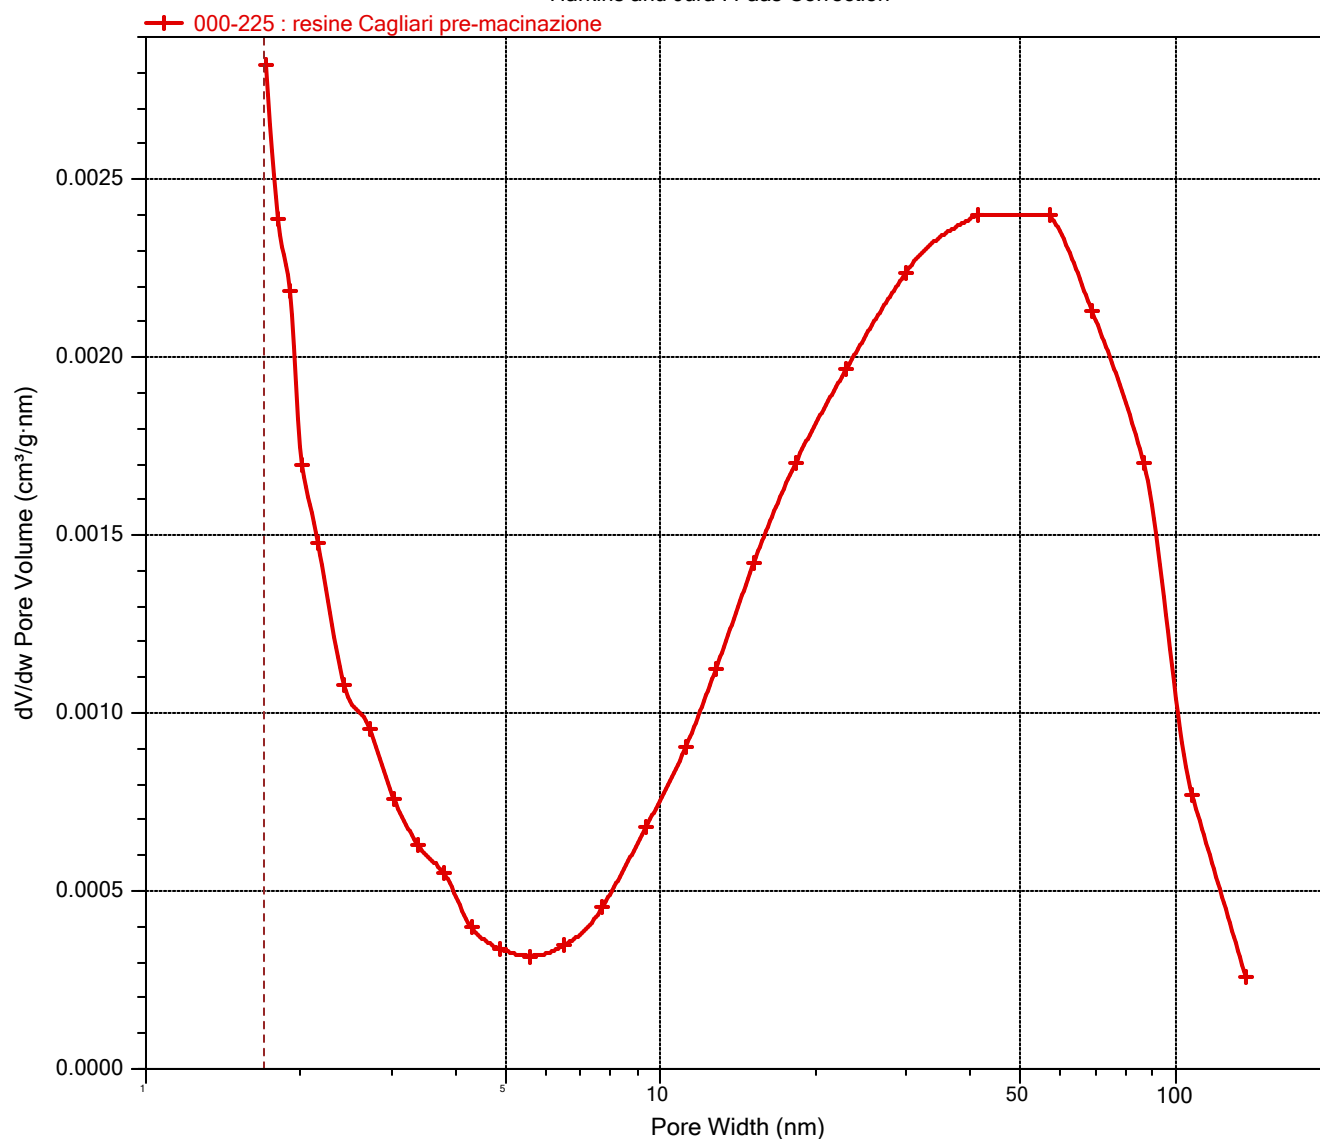

Sample: resine Cagliari pre-macinazione

Operator:

Submitter:

File: C:\ASAP 2020 Plus\data\Chiappone\2022-1...\000-225.SMP

|                      |                         |                         |                                  |
|----------------------|-------------------------|-------------------------|----------------------------------|
| Started:             | 24/10/2022 09:45:14     | Analysis adsorptive:    | N2                               |
| Completed:           | 24/10/2022 18:12:00     | Analysis bath temp.:    | 77,159 K                         |
| Report time:         | 24/10/2022 20:01:54     | Thermal correction:     | No                               |
| Sample mass:         | 0,4650 g                | Ambient free space:     | 27,2106 cm <sup>3</sup> Measured |
| Analysis free space: | 81,8113 cm <sup>3</sup> | Equilibration interval: | 10 s                             |
| Low pressure dose:   | None                    | Sample density:         | 1,000 g/cm <sup>3</sup>          |
| Automatic degas:     | Yes                     |                         |                                  |

| Sample prep: Stage | Temperature (°C) | Ramp Rate (°C/min) | Time (min) |
|--------------------|------------------|--------------------|------------|
| 1                  | 30               | 10                 | 10         |

## BJH Desorption Pore Distribution Report

Faas Correction

Harkins and Jura

$$t = [ 13.99 / ( 0.034 - \log(p/p^0) ) ] ^{0.5}$$

Width range: 1,7000 to 300,0000 nm  
 Adsorbate property factor: 0,95300 nm  
 Density conversion factor: 0,0015468  
 Fraction of pores open at both ends: 0,00

| Pore Width<br>Range (nm) | Average Width<br>(nm) | Incremental<br>Pore Volume<br>(cm <sup>3</sup> /g) | Cumulative Pore<br>Volume (cm <sup>3</sup> /g) | Incremental<br>Pore Area (m <sup>2</sup> /g) | Cumulative Pore<br>Area (m <sup>2</sup> /g) |
|--------------------------|-----------------------|----------------------------------------------------|------------------------------------------------|----------------------------------------------|---------------------------------------------|
| 172.8 - 75.3             | 90.3                  | 0.001364                                           | 0.001364                                       | 0.060                                        | 0.060                                       |
| 75.3 - 46.4              | 54.1                  | 0.012263                                           | 0.013627                                       | 0.906                                        | 0.966                                       |
| 46.4 - 37.9              | 41.3                  | 0.039958                                           | 0.053585                                       | 3.873                                        | 4.840                                       |
| 37.9 - 35.1              | 36.4                  | 0.036843                                           | 0.090429                                       | 4.048                                        | 8.888                                       |
| 35.1 - 31.0              | 32.8                  | 0.041330                                           | 0.131759                                       | 5.037                                        | 13.925                                      |
| 31.0 - 28.7              | 29.7                  | 0.016135                                           | 0.147894                                       | 2.170                                        | 16.095                                      |
| 28.7 - 21.9              | 24.3                  | 0.036412                                           | 0.184306                                       | 5.994                                        | 22.088                                      |
| 21.9 - 16.0              | 18.0                  | 0.021129                                           | 0.205435                                       | 4.707                                        | 26.796                                      |
| 16.0 - 13.4              | 14.5                  | 0.005937                                           | 0.211372                                       | 1.641                                        | 28.437                                      |
| 13.4 - 11.3              | 12.2                  | 0.003661                                           | 0.215034                                       | 1.202                                        | 29.640                                      |
| 11.3 - 10.5              | 10.9                  | 0.000927                                           | 0.215960                                       | 0.340                                        | 29.980                                      |
| 10.5 - 8.2               | 9.1                   | 0.001439                                           | 0.217399                                       | 0.633                                        | 30.612                                      |

Sample: resine Cagliari pre-macinazione  
Operator:  
Submitter:  
File: C:\ASAP 2020 Plus\data\Chiappone\2022-1...\000-225.SMP

|                      |                         |                         |                                  |
|----------------------|-------------------------|-------------------------|----------------------------------|
| Started:             | 24/10/2022 09:45:14     | Analysis adsorptive:    | N2                               |
| Completed:           | 24/10/2022 18:12:00     | Analysis bath temp.:    | 77,159 K                         |
| Report time:         | 24/10/2022 20:01:54     | Thermal correction:     | No                               |
| Sample mass:         | 0,4650 g                | Ambient free space:     | 27,2106 cm <sup>3</sup> Measured |
| Analysis free space: | 81,8113 cm <sup>3</sup> | Equilibration interval: | 10 s                             |
| Low pressure dose:   | None                    | Sample density:         | 1,000 g/cm <sup>3</sup>          |
| Automatic degas:     | Yes                     |                         |                                  |

| Sample prep: Stage | Temperature (°C) | Ramp Rate (°C/min) | Time (min) |
|--------------------|------------------|--------------------|------------|
| 1                  | 30               | 10                 | 10         |

### BJH Desorption Cumulative Pore Volume (Larger)

Harkins and Jura : Faas Correction

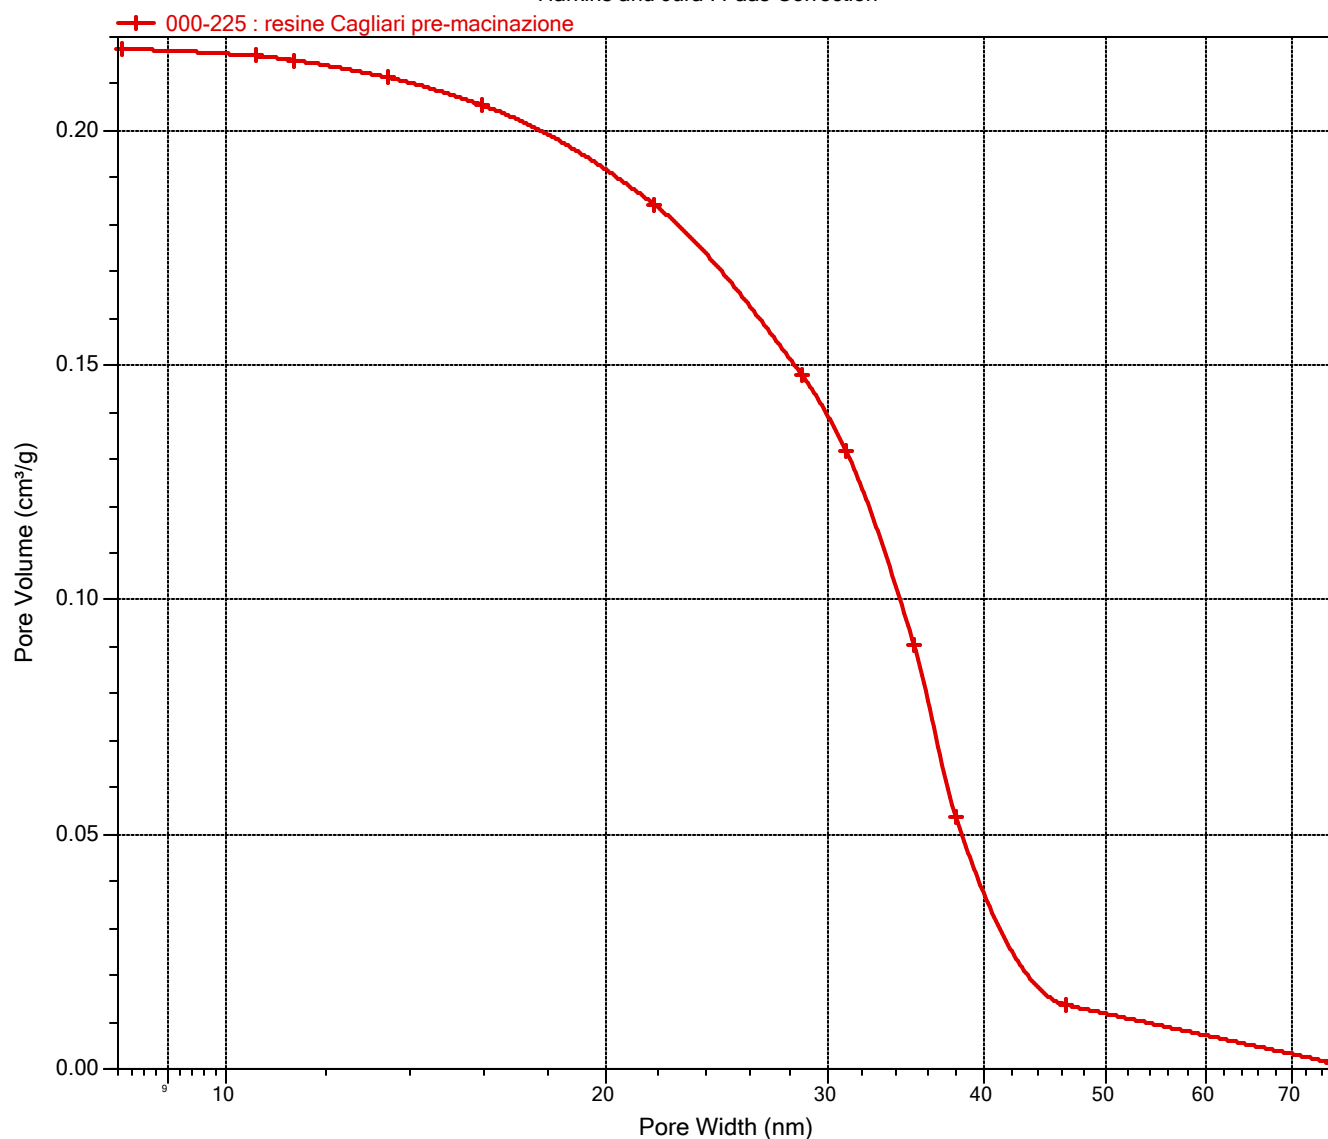

Sample: resine Cagliari pre-macinazione

Operator:

Submitter:

File: C:\ASAP 2020 Plus\data\Chiappone\2022-1...\000-225.SMP

|                      |                         |                         |                                  |
|----------------------|-------------------------|-------------------------|----------------------------------|
| Started:             | 24/10/2022 09:45:14     | Analysis adsorptive:    | N2                               |
| Completed:           | 24/10/2022 18:12:00     | Analysis bath temp.:    | 77,159 K                         |
| Report time:         | 24/10/2022 20:01:54     | Thermal correction:     | No                               |
| Sample mass:         | 0,4650 g                | Ambient free space:     | 27,2106 cm <sup>3</sup> Measured |
| Analysis free space: | 81,8113 cm <sup>3</sup> | Equilibration interval: | 10 s                             |
| Low pressure dose:   | None                    | Sample density:         | 1,000 g/cm <sup>3</sup>          |
| Automatic degas:     | Yes                     |                         |                                  |

Sample prep: Stage  
1

Temperature (°C)  
30

Ramp Rate (°C/min)  
10

Time (min)  
10

### BJH Desorption dV/dw Pore Volume

Harkins and Jura : Faas Correction

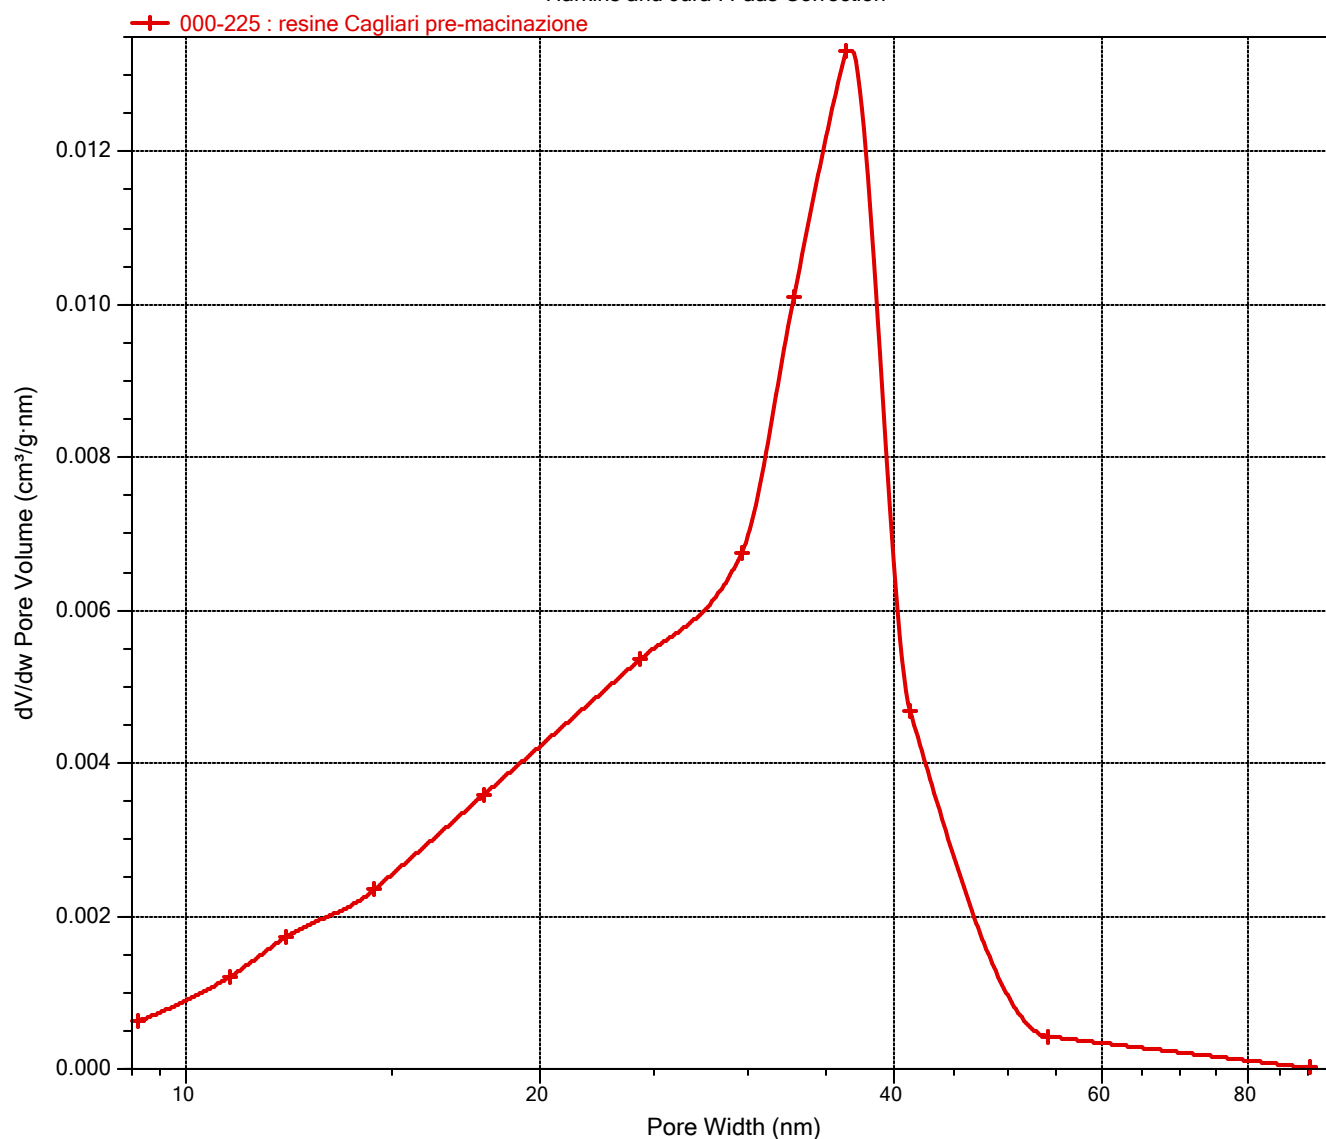

Sample: resine Cagliari pre-macinazione

Operator:

Submitter:

File: C:\ASAP 2020 Plus\data\Chiappone\2022-1...\000-225.SMP

|                      |                         |                         |                                  |
|----------------------|-------------------------|-------------------------|----------------------------------|
| Started:             | 24/10/2022 09:45:14     | Analysis adsorptive:    | N2                               |
| Completed:           | 24/10/2022 18:12:00     | Analysis bath temp.:    | 77,159 K                         |
| Report time:         | 24/10/2022 20:01:54     | Thermal correction:     | No                               |
| Sample mass:         | 0,4650 g                | Ambient free space:     | 27,2106 cm <sup>3</sup> Measured |
| Analysis free space: | 81,8113 cm <sup>3</sup> | Equilibration interval: | 10 s                             |
| Low pressure dose:   | None                    | Sample density:         | 1,000 g/cm <sup>3</sup>          |
| Automatic degas:     | Yes                     |                         |                                  |

| Sample prep: Stage | Temperature (°C) | Ramp Rate (°C/min) | Time (min) |
|--------------------|------------------|--------------------|------------|
| 1                  | 30               | 10                 | 10         |

## DFT Pore Size Reports

Primary Data

4070- Unable to load deconvolution model Invalid.

Sample: resine Cagliari pre-macinazione

Operator:

Submitter:

File: C:\ASAP 2020 Plus\data\Chiappone\2022-1...\000-225.SMP

|                      |                         |                         |                                  |
|----------------------|-------------------------|-------------------------|----------------------------------|
| Started:             | 24/10/2022 09:45:14     | Analysis adsorptive:    | N2                               |
| Completed:           | 24/10/2022 18:12:00     | Analysis bath temp.:    | 77,159 K                         |
| Report time:         | 24/10/2022 20:01:54     | Thermal correction:     | No                               |
| Sample mass:         | 0,4650 g                | Ambient free space:     | 27,2106 cm <sup>3</sup> Measured |
| Analysis free space: | 81,8113 cm <sup>3</sup> | Equilibration interval: | 10 s                             |
| Low pressure dose:   | None                    | Sample density:         | 1,000 g/cm <sup>3</sup>          |
| Automatic degas:     | Yes                     |                         |                                  |

| Sample prep: Stage | Temperature (°C) | Ramp Rate (°C/min) | Time (min) |
|--------------------|------------------|--------------------|------------|
| 1                  | 30               | 10                 | 10         |

## DFT Surface Energy Reports

Primary Data

4070- Unable to load deconvolution model Invalid.
